# Supplementary material for: A Correlation Study on the Prediction of Coronary Artery Lesion Degree by Pulse Wave Harmonics Based on SYNTAX Score
Source: Research Square preprint supplement (doi:10.21203/rs.3.rs-6201108/v1), 2025-07-01
Supplement: Supplementary file 1 [file 80c3bf19a4a52c27a2df675e.xlsx]

## Sheet: 工作表1
Syntax 2	Gender	Age	Height	Weight	Finger	HR	SpO2	C0	C1	C2	C3	C4	C5	C6	C7	Raw File Name	c0	c1	c2	c3	c4	c5	c6	c7	c8	c9	c10	c11	c0cv	c1cv	c2cv	c3cv	c4cv	c5cv	c6cv	c7cv	c8cv	c9cv	c10cv	c11cv	p1	p2	p3	p4	p5	p6	p7	p8	p9
7	'M'	74	170	80	Left index finger'	60	83	-19	24	64	-23	-10	-5	2	2	cgn24gcg0t8edo0ciuqg.txt	0.427251	0.830394	0.473572	0.262892	0.123438	0.0821865	0.0556705	0.0424155	0.0260305	0.0191974	0.011726	0.0098007	0.0650266	0.120153	0.0765148	0.117098	0.133629	0.163354	0.297899	0.23662	0.288069	0.31171	0.349485	0.51025	4.45934	3.96595	3.17258	2.73478	2.59373	2.25035	1.9571	1.76894	1.51812
25	'M'	43	170	72	Left index finger'	65	98	6	0	0	2	-27	12	32	-18	cgn7nu4g0t8edo0cl95g.txt	0.595503	0.639745	0.274119	0.202981	0.0826791	0.0622567	0.0566845	0.0309364	0.0146022	0.013236	0.0103985	0.0060373	0.0373357	0.0374993	0.0572726	0.104481	0.13395	0.104938	0.163666	0.197607	0.193427	0.15148	0.208855	0.254899	4.03325	3.90576	3.25858	2.83634	3.06895	2.51465	1.90955	1.95603	1.97045
3	'M'	72	168	59	Left index finger'	72	99	-5	21	-7	-52	-9	61	-41	6	chcbae4g0t87qvpjlhfg.txt	0.522602	0.784535	0.256211	0.0859761	0.0415709	0.0453241	0.0167567	0.0125478	0.01277	0.0052429	0.00469498	0.00392649	0.00662685	0.0107043	0.0138785	0.0453847	0.058044	0.0310328	0.0982587	0.114533	0.0440803	0.140578	0.137198	0.112057	3.92294	3.15349	2.51195	3.34277	2.71473	2.11583	2.76841	2.21517	1.98359
26	'M'	54	173	66	Left index finger'	68	95	-13	22	36	-4	-18	24	32	-13	cfvgmtavjtonbn3d97b0.txt	0.487173	0.759931	0.369813	0.250296	0.113318	0.0976233	0.0825233	0.0472126	0.0256307	0.0248632	0.0180928	0.0101248	0.0734281	0.152882	0.0709771	0.109482	0.192823	0.0891236	0.103604	0.168252	0.351341	0.281355	0.354569	0.455366	4.38598	3.94778	3.29877	2.96249	3.01439	2.43407	1.78158	1.78636	1.62049
0	'M'	63	175	78	Left index finger'	61	98	-10	25	10	-33	-52	66	46	-24	cgc2p6sg0t8d04b8cqug.txt	0.494118	0.811571	0.302876	0.141556	0.0364057	0.0415867	0.0394693	0.0192075	0.0052911	0.00808689	0.00596312	0.00245646	0.0114478	0.0192055	0.0218453	0.0389879	0.0916704	0.0453847	0.0336432	0.0702172	0.14792	0.0832468	0.105955	0.251756	4.07713	3.36629	2.74369	2.43079	3.14387	2.31317	1.52703	2.05162	1.92409
14	'M'	49	178	85	Left index finger'	72	95	-1	14	-3	-16	-41	-20	100	-2	chi9ud72had9fa0j6jug.txt	0.549459	0.749403	0.261015	0.149825	0.049256	0.0272789	0.0343792	0.0223567	0.00735179	0.00501531	0.00525987	0.0028772	0.0372096	0.0789411	0.0632001	0.123081	0.187564	0.223135	0.0925582	0.278949	0.502539	0.215704	0.175915	0.42129	3.93403	3.44461	2.98753	2.38669	2.84862	2.37656	1.58687	1.17003	1.70222
2	'M'	67	172	70	Left index finger'	58	97	-9	19	29	-17	10	-5	15	38	cbteu7avjtoqui5t4qgg.txt	0.519708	0.839851	0.24175	0.130708	0.0882021	0.0572452	0.0368631	0.0251915	0.0156487	0.00875074	0.00736673	0.00551294	0.127086	0.204378	0.600252	0.641179	0.603978	0.606275	0.788327	0.81457	0.782217	1.01128	1.006	0.988725	3.81152	3.51228	3.29678	3.06349	2.91136	2.66842	2.38661	2.07072	2.10712
9	'M'	67	171	84	Left index finger'	59	95	-8	16	8	-1	0	-47	62	26	cgvs17v2had61ag64kp0.txt	0.506645	0.772147	0.315097	0.213127	0.119699	0.0416979	0.0451443	0.0377577	0.0207926	0.00808137	0.00734041	0.00538699	0.0385457	0.0603676	0.0389865	0.0662966	0.0604765	0.0697868	0.074148	0.0781155	0.0990629	0.212405	0.161553	0.235412	4.24301	3.6753	3.24815	2.53063	2.68272	2.55843	1.79536	1.11108	1.31201
14	'M'	52	183	106	Left index finger'	62	94	0	11	0	-10	-37	-12	45	-13	cg7dmisg0t8d04b7n0n0.txt	0.55633	0.715997	0.280225	0.170488	0.0579086	0.0342917	0.0332799	0.0188207	0.00806899	0.00472091	0.00370202	0.00297061	0.0225408	0.0266619	0.0335698	0.0287606	0.0848865	0.0731921	0.0507096	0.106255	0.118836	0.239367	0.281771	0.298945	3.96749	3.61806	2.89359	2.50797	2.84159	2.19696	1.63879	1.50026	1.59957
6	'M'	64	166	65	Left index finger'	72	97	-10	31	17	-36	-17	46	-3	-35	chmt3l4g0t8fl7e7280g.txt	0.49475	0.834252	0.333738	0.157978	0.0720053	0.0595646	0.0438332	0.023719	0.0143979	0.0110062	0.00760218	0.00514079	0.0507976	0.0841374	0.100673	0.227212	0.272476	0.281558	0.383325	0.541834	0.433758	0.40848	0.431849	0.491959	4.2786	3.61244	3.02539	2.80144	2.87929	2.31453	1.87363	1.8329	1.72959
7	'M'	89	170	69	Left index finger'	70	95	3	6	2	-26	-19	16	3	-21	ccqlj0sg0t8fak1n5kng.txt	0.574948	0.681726	0.286111	0.147918	0.0647535	0.0506466	0.0351819	0.0188854	0.0122216	0.00921079	0.00567171	0.00334772	0.00915681	0.0151761	0.0123578	0.0306787	0.0245511	0.026173	0.0299115	0.0421042	0.0498823	0.0295282	0.0833139	0.126366	3.97767	3.65412	2.91792	2.85852	2.83141	2.32367	2.02392	2.11349	1.78828
7	'M'	74	176	80	Left index finger'	77	96	-4	18	5	-7	-17	-14	-3	-14	cg3faesg0t8d04b77f8g.txt	0.527773	0.716038	0.32204	0.170869	0.101195	0.0476268	0.0447488	0.0188504	0.016005	0.0064197	0.00873581	0.00372638	0.0820496	0.249405	0.327225	0.293928	0.663521	0.200843	0.979039	0.435727	1.41961	0.264785	1.52896	0.780679	4.09396	3.52792	2.94866	2.55118	2.5369	2.2283	1.81959	1.73118	1.71911
3	'M'	71	170	70	Left index finger'	61	94	-11	27	17	-32	-36	11	36	-9	cg9cbvavjtopa61r986g.txt	0.489403	0.827212	0.323906	0.150977	0.0520157	0.0419847	0.036476	0.0206606	0.00841039	0.00705123	0.00509672	0.00263804	0.0131151	0.0222487	0.020671	0.0328179	0.0631051	0.0468531	0.03552	0.117576	0.0935532	0.062986	0.143478	0.274887	4.14557	3.45609	2.78182	2.46341	2.77408	2.29133	1.72572	1.56044	1.81484
11	'M'	58	168	65	Left index finger'	67	95	-2	14	2	-20	-43	26	11	-26	cgn7j54g0t8edo0cl77g.txt	0.549774	0.734326	0.27858	0.153081	0.049274	0.0415875	0.0300671	0.0141209	0.00547121	0.00468749	0.00350846	0.00217008	0.0320691	0.0526236	0.0695781	0.10369	0.106507	0.0898368	0.145389	0.351967	0.275234	0.343711	0.43781	0.502688	3.9582	3.51381	2.84284	2.54888	2.79951	2.16012	1.50514	1.70996	1.84577
31	'M'	61	160	60	Left index finger'	51	97	-6	15	8	-15	-3	-33	30	52	cgvqnf72had61ag63s1g.txt	0.527325	0.731896	0.287802	0.16971	0.0883585	0.0402832	0.0366518	0.0361574	0.0254021	0.0151822	0.011722	0.0108044	0.040345	0.0551801	0.0408144	0.036923	0.0564384	0.266951	0.301079	0.22362	0.215919	0.341002	0.410826	0.339206	4.17544	3.65871	3.2026	2.71795	2.8056	3.02369	2.62815	2.10225	1.88849
0	'M'	47	173	95	Left index finger'	67	95	-3	7	24	-26	-19	4	5	-21	cg3f4fsg0t8d04b77dmg.txt	0.538904	0.695883	0.339584	0.171489	0.0758811	0.0557751	0.0371208	0.0184892	0.0104884	0.00758005	0.00462328	0.00287581	0.0255881	0.0366141	0.0354565	0.0694735	0.111742	0.130362	0.18126	0.251747	0.226576	0.195476	0.192575	0.285018	4.09986	3.643	2.86515	2.69514	2.58457	2.1049	1.78398	1.87138	1.75408
0	'M'	53	170	80	Left index finger'	68	97	4	9	-7	-13	-36	23	-2	-30	cgiiesf2had620d4ftp0.txt	0.592021	0.694781	0.260429	0.147965	0.0543971	0.042599	0.0297538	0.0128018	0.00671004	0.00633874	0.0032966	0.00242246	0.0261531	0.0448196	0.0722016	0.111308	0.16227	0.228325	0.232071	0.331682	0.395901	0.433998	0.465042	0.570953	3.8243	3.5438	2.84605	2.79832	2.66134	1.79739	1.39462	1.87967	1.71261
28	'M'	76	172	82	Left index finger'	69	98	-19	42	40	-40	-36	47	-7	-17	cfvgkiivjtonbn3d96o0.txt	0.452311	0.915585	0.383579	0.156805	0.0546616	0.0556849	0.0338214	0.0186762	0.014022	0.00911862	0.00565587	0.00387383	0.00797532	0.0188568	0.0212708	0.0497995	0.0442086	0.047207	0.0674869	0.0780459	0.101332	0.156185	0.179614	0.334063	4.27427	3.45897	2.65565	2.72935	2.55055	1.98097	1.82112	1.64481	1.3643
5	'M'	67	175	88	Left index finger'	59	96	-11	28	17	-27	-7	-22	34	11	cgglgk4g0t8edo0amca0.txt	0.492549	0.824375	0.322992	0.162891	0.0788721	0.0436837	0.0393405	0.028345	0.0153824	0.00846868	0.00676185	0.00516731	0.0253268	0.0321438	0.0355172	0.0517042	0.117882	0.0690571	0.0575875	0.0464645	0.073366	0.0828461	0.149782	0.139033	4.21271	3.54285	3.02529	2.60464	2.7365	2.55638	2.0065	1.50767	1.4948
29	'M'	68	168	76	Left index finger'	64	97	1	12	-6	-26	-15	32	20	-16	ccaqc4f2hadcsjhiqveg.txt	0.556099	0.74397	0.256647	0.127264	0.0558567	0.0530318	0.0419257	0.0215943	0.0156925	0.0128619	0.00817023	0.00568896	0.0450162	0.0774027	0.0590932	0.181053	0.281354	0.19485	0.214561	0.30429	0.280218	0.310026	0.304858	0.34947	4.03221	3.52412	3.10276	2.97188	3.0451	2.52596	2.14608	2.19203	1.89161
1	'M'	68	175	78	Left index finger'	73	93	-7	21	26	-41	-9	51	-40	-6	cca1lkv2hadcsjhio9d0.txt	0.513798	0.77725	0.352105	0.145721	0.068567	0.070903	0.0288517	0.0164942	0.0161266	0.00739144	0.00505206	0.00390716	0.00797913	0.0118611	0.0246652	0.0598638	0.0518821	0.0482488	0.0686258	0.103596	0.0737582	0.114977	0.110922	0.120784	4.151	3.57008	2.70238	3.09347	2.48186	1.76312	2.12524	1.63244	1.29699
11	'M'	56	170	71	Left index finger'	78	97	-7	22	12	-32	-25	28	14	-22	cgqir872had7n67r8ivg.txt	0.508762	0.801462	0.310987	0.144174	0.0589432	0.0520633	0.0400715	0.019764	0.0114532	0.00996628	0.00614053	0.00338112	0.0188108	0.0376468	0.0267686	0.0733498	0.0969124	0.0629833	0.0772221	0.170658	0.132221	0.148459	0.215566	0.415616	4.12745	3.44625	2.87518	2.91321	2.83897	2.1123	1.67886	1.85129	1.52053
15	'M'	50	170	70	Left index finger'	64	95	-15	14	33	4	-3	-18	19	4	cgvrvk4g0t889ug8sb8g.txt	0.479075	0.721971	0.359337	0.257657	0.137951	0.0758137	0.0605447	0.0407397	0.0212734	0.0103511	0.00771555	0.00637576	0.0211772	0.0280789	0.0172437	0.0550079	0.0598834	0.0423471	0.0535077	0.0729001	0.10816	0.154171	0.109949	0.105523	4.3287	3.9186	3.37612	2.76115	2.60256	2.2697	1.74694	1.35918	1.30615
10	'M'	51	170	70	Left index finger'	80	94	-6	13	34	-40	8	16	-31	8	cgqiqmf2had7n67r8ik0.txt	0.525466	0.72568	0.369452	0.151429	0.0920807	0.0729609	0.0329123	0.0238804	0.0178848	0.00980003	0.00656469	0.00507758	0.0165935	0.0237746	0.0292267	0.0522287	0.0383747	0.0508589	0.0812974	0.063186	0.0649749	0.124869	0.138619	0.181094	4.19434	3.65514	2.92708	3.05889	2.50541	2.10684	2.15635	1.74988	1.50528
12	'M'	65	170	70	Left index finger'	79	96	-8	17	13	-3	-53	-14	58	-23	chmtbbn2had5ptrsf9o0.txt	0.506473	0.757004	0.319692	0.221807	0.0586642	0.0300375	0.0333187	0.0169033	0.00608232	0.00346431	0.00362015	0.00216292	0.0153435	0.0227952	0.0204099	0.0398594	0.104743	0.199155	0.114007	0.165498	0.319536	0.456264	0.288999	0.464715	4.07712	3.63925	2.79808	2.21735	2.53649	1.99563	1.48414	1.34336	1.8539
26	'M'	65	172	70	Left index finger'	49	95	-1	10	-2	-26	-24	-12	54	16	ccqlafkg0t8fak1n5hog.txt	0.553613	0.699054	0.264978	0.136458	0.0560021	0.0341819	0.0345658	0.0260542	0.0134998	0.00996379	0.0116633	0.00862758	0.0297505	0.0466873	0.0556184	0.0737426	0.108241	0.0570634	0.0669045	0.126591	0.124376	0.135433	0.103978	0.167756	4.0247	3.47464	3.01782	2.58763	3.00439	2.89719	2.4388	2.20849	2.6141
20	'M'	71	170	49	Left index finger'	74	99	-5	20	11	-42	-10	37	-37	8	cbfkj572hadbnne3ikog.txt	0.525793	0.779787	0.303277	0.116244	0.0604298	0.0564587	0.0224658	0.0172033	0.0159553	0.00887422	0.00571069	0.0046705	0.0117897	0.0201916	0.0142356	0.0607419	0.0694881	0.0537386	0.105237	0.115559	0.0996832	0.156099	0.197425	0.181218	4.08465	3.42134	2.78849	3.12472	2.65317	2.13798	2.48242	1.96648	1.62525
13	'M'	66	164	80	Left index finger'	64	95	-13	22	30	-27	-48	9	34	-22	chb0ua4g0t889ug9omm0.txt	0.479619	0.791213	0.355811	0.183252	0.0528796	0.0391037	0.0355061	0.0178668	0.010385	0.00810036	0.00522852	0.00295322	0.014935	0.0471413	0.0222305	0.0823555	0.251221	0.184319	0.109861	0.255998	0.106688	0.102419	0.266618	0.208465	4.18301	3.53125	2.76483	2.27396	2.94131	2.33652	1.77203	1.83156	1.79161
26	'M'	58	170	60	Left index finger'	69	98	2	27	-41	-49	-58	69	12	-39	cfu9c9qvjtonbn3d3tn0.txt	0.569087	0.824076	0.16937	0.0566264	0.0123668	0.0158572	0.0110661	0.00477862	0.0024606	0.00215796	0.00178583	0.00139819	0.0226666	0.0272212	0.0738742	0.110094	0.276944	0.175617	0.165	0.302394	0.709883	0.721352	0.484168	0.579034	3.55085	2.84047	2.49246	2.55911	3.25086	2.45038	1.96792	2.27131	2.81452
20	'M'	63	170	60	Left index finger'	63	98	-6	28	-6	-50	-52	-22	53	22	cg3f5gcg0t8d04b77e0g.txt	0.525097	0.816663	0.265475	0.0909642	0.0214141	0.012993	0.0131139	0.00907654	0.00464185	0.00314077	0.00255316	0.00258961	0.0646741	0.0855474	0.0715864	0.233495	0.45985	0.438213	0.309808	0.527222	0.613286	0.630498	0.652167	0.426263	3.81126	3.0356	2.25529	1.91105	3.04158	2.82241	2.12758	2.27052	2.64291
9.5	'M'	55	173	73	Left index finger'	68	93	-10	19	13	5	-17	-53	-6	49	chmtc072had5ptrsfa3g.txt	0.494547	0.76853	0.314143	0.232846	0.101917	0.0310759	0.0204428	0.019961	0.0112339	0.00350942	0.00422677	0.00415388	0.0249003	0.04072	0.0330188	0.0389367	0.0847715	0.108087	0.142193	0.119569	0.145134	0.22805	0.207126	0.123884	4.13871	3.68288	2.994	2.27827	2.07592	2.30615	1.76383	1.23395	1.41443
0	'M'	58	188	101	Left index finger'	60	94	-2	14	0	-16	-18	-20	52	16	cbors8qvjtoqui5si2r0.txt	0.585964	0.689547	0.237278	0.145391	0.0654512	0.0416402	0.039926	0.0297512	0.0167171	0.0110421	0.0102272	0.00757853	0.068469	0.101923	0.108263	0.108286	0.213848	0.139061	0.157517	0.178512	0.274492	0.253506	0.180359	0.223033	3.96126	3.60385	3.1931	2.83677	3.16519	2.9387	2.35672	2.02713	2.25
2	'M'	45	175	95	Left index finger'	80	96	-9	13	25	5	-33	-12	11	-24	cge12qn2had620d2gd80.txt	0.504854	0.728738	0.34285	0.247453	0.0890168	0.0551987	0.039909	0.0192414	0.00721084	0.00439441	0.00369969	0.00258749	0.0464076	0.0520757	0.0886288	0.071653	0.102434	0.0785974	0.118285	0.168663	0.212878	0.188522	0.238773	0.314686	4.13141	3.83678	3.1004	2.4667	2.44048	1.85142	1.2784	1.01889	1.33447
10	'M'	61	173	64	Left index finger'	54	98	-5	11	6	-5	-21	-55	59	14	cfms7tivjtonbn3c03ig.txt	0.521114	0.713098	0.301469	0.204897	0.0858542	0.025835	0.0294295	0.0208633	0.0104299	0.00551237	0.00396344	0.00259406	0.0537095	0.05889	0.0686631	0.0914219	0.0772688	0.0619128	0.0934245	0.0811642	0.10732	0.217775	0.224587	0.640071	4.08152	3.64466	2.98541	2.20549	2.67369	2.6653	2.08708	1.70807	1.67318
9	'M'	68	164	63	Left index finger'	63	94	0	11	7	-11	-39	56	23	-31	cflm7mavjtonbn3bpt9g.txt	0.548042	0.742559	0.278072	0.159856	0.0490699	0.0564396	0.0426858	0.017338	0.0135129	0.0113587	0.00637644	0.00417915	0.0232504	0.0301173	0.0532477	0.0828354	0.101934	0.11332	0.160658	0.245566	0.155628	0.190676	0.228327	0.239554	4.02475	3.70768	2.90323	2.74987	2.98644	2.29093	1.84986	2.15663	1.75762
0	'M'	63	165	70	Left index finger'	64	95	3	12	-6	-25	-3	-28	22	15	chcasnsg0t87qvpjlb6g.txt	0.56867	0.728356	0.258848	0.134295	0.071557	0.034205	0.0270934	0.0211034	0.0114632	0.00541151	0.0051378	0.00420455	0.0296438	0.0348671	0.0376561	0.0284252	0.0559808	0.065586	0.0849107	0.0964184	0.178995	0.228352	0.151425	0.160295	3.97582	3.42857	3.12601	2.6752	2.70754	2.59731	2.04791	1.58282	1.80747
28	'M'	59	173	70	Left index finger'	66	97	-11	27	14	-32	-29	-8	62	-4	chi9qiv2had9fa0j6i60.txt	0.493267	0.823884	0.314904	0.148792	0.0586557	0.0357669	0.0389349	0.0250839	0.00754943	0.00416674	0.00489222	0.00296723	0.0136532	0.0214011	0.0130689	0.0267245	0.110761	0.101406	0.0557358	0.0751051	0.28362	0.24851	0.134989	0.201138	4.11779	3.39646	2.85799	2.40539	2.81636	2.26795	1.43724	0.832797	1.79951
25	'M'	58	168	60	Left index finger'	71	93	-17	22	61	-34	-31	7	-1	-9	cg8np9sg0t8d04b7s220.txt	0.460432	0.793648	0.442802	0.203526	0.0759231	0.0561838	0.0374173	0.0213531	0.0124473	0.00827158	0.00529506	0.00315032	0.0443056	0.0737901	0.0555446	0.0438135	0.0663263	0.0732252	0.0778779	0.117231	0.127523	0.140091	0.158382	0.180587	4.30016	3.66503	2.75851	2.56544	2.4879	1.98735	1.54057	1.39643	1.24609
18	'M'	86	168	63	Left index finger'	67	100	-6	19	4	-42	-44	34	0	-2	cbksv5sg0t87cj2okt8g.txt	0.52672	0.776683	0.28373	0.112912	0.0321354	0.0302315	0.0202231	0.0118534	0.0072882	0.00534587	0.00359404	0.00234066	0.0260437	0.0465418	0.0446571	0.105588	0.142896	0.0790129	0.107747	0.15413	0.146881	0.229155	0.414963	0.533475	3.94268	3.26286	2.58648	2.69884	2.79851	2.33597	2.04337	2.11472	1.99752
18	'M'	36	172	60	Left index finger'	80	93	-23	20	68	6	-34	6	11	-19	cg81tdsg0t8d04b7padg.txt	0.422819	0.7689	0.466345	0.342513	0.124197	0.0938589	0.0685165	0.0356316	0.01821	0.0126777	0.00809632	0.0045852	0.0187661	0.0313839	0.100207	0.0817457	0.161483	0.0409541	0.135902	0.233495	0.199928	0.16722	0.289566	0.289593	4.31287	4.09441	2.86083	2.48539	2.35814	1.51794	0.917093	0.775003	0.866091
0	'M'	61	168	80	Left index finger'	63	93	-10	22	25	-18	-31	-11	14	-17	chlhnvcg0t8fl7e6m7t0.txt	0.496491	0.794961	0.340591	0.19636	0.0744064	0.0447763	0.0341673	0.0182687	0.0078479	0.00559251	0.00412773	0.00214942	0.0156125	0.0213747	0.0255952	0.0226778	0.0366328	0.0508477	0.0513659	0.0535656	0.117571	0.140503	0.200482	0.244552	4.15812	3.63766	2.8273	2.36712	2.47376	2.06108	1.51326	1.26405	1.39635
12	'M'	43	175	80	Left index finger'	53	93	-10	21	23	-8	-5	-26	33	17	cg1ban4g0t8d04b6uu90.txt	0.498862	0.778689	0.342399	0.21671	0.113336	0.05809	0.0509283	0.0398444	0.0219226	0.0102689	0.00821393	0.00685731	0.0197491	0.0206108	0.0274026	0.0435061	0.0424971	0.0707222	0.046234	0.0452144	0.0855825	0.0873798	0.129913	0.0855814	4.30484	3.78761	3.31771	2.72178	2.65686	2.5352	1.97979	1.46517	1.47189
15	'M'	71	167	66	Left index finger'	74	96	-6	21	13	-44	7	37	-36	5	cfe91s2vjtonbn3a6710.txt	0.520812	0.783846	0.310591	0.124473	0.0671978	0.0664023	0.0282136	0.0181547	0.015476	0.00889554	0.00591098	0.00406882	0.00739964	0.0138942	0.0177254	0.0742123	0.0792592	0.0369527	0.115754	0.0538617	0.0539198	0.0983857	0.105508	0.10977	4.11059	3.51905	2.72004	3.16572	2.64986	2.07373	2.26822	1.91203	1.5966
9	'M'	63	178	72	Left index finger'	74	95	-18	32	47	-21	-47	8	10	-26	cgptmtn2had7n67qve00.txt	0.483627	0.809664	0.374028	0.198309	0.0587254	0.0469765	0.0312623	0.0156554	0.00612011	0.00642735	0.0050361	0.0026812	0.125279	0.114789	0.197205	0.229215	0.228645	0.292789	0.347638	0.332271	0.432465	0.484033	0.434195	0.609284	4.19662	3.49733	2.62234	2.39461	2.48728	1.70235	1.47028	1.68469	1.35395
6	'M'	34	178	90	Left index finger'	65	97	-5	14	14	-2	-6	-24	47	13	cg3fj5f2had4qgopfnu0.txt	0.535802	0.725045	0.305559	0.2084	0.107416	0.055073	0.054201	0.0414505	0.0227636	0.011291	0.00792018	0.006244	0.0246639	0.0506061	0.0398189	0.0381274	0.0660355	0.0473408	0.0458603	0.0643265	0.0779395	0.0953821	0.12241	0.242169	4.20065	3.80145	3.3279	2.79314	2.82761	2.57085	1.97463	1.52674	1.38826
3	'M'	58	170	71	Left index finger'	64	91	-1	15	4	-9	-11	9	6	-18	cfvgqaf2haddiqs1s9m0.txt	0.543588	0.743687	0.294159	0.186533	0.0900166	0.0674301	0.0469038	0.0254525	0.0165372	0.0133497	0.00877192	0.00564393	0.0192252	0.030396	0.0225244	0.0509537	0.0532594	0.0329543	0.0840066	0.118319	0.07491	0.11806	0.138566	0.133418	4.19976	3.72061	3.17801	2.92976	2.85836	2.32387	1.91874	2.01051	1.84079
4	'M'	48	170	80	Left index finger'	84	95	-2	12	21	-46	-5	24	-34	-13	cgn731sg0t8edo0ckv80.txt	0.543912	0.710569	0.352063	0.125336	0.0693195	0.0563829	0.0249633	0.0131873	0.008958	0.00492181	0.00299096	0.00229362	0.0247565	0.0464681	0.0548247	0.164232	0.12175	0.0864456	0.187839	0.167321	0.269489	0.349433	0.365972	0.555936	4.00363	3.5353	2.69933	3.00786	2.3713	1.64035	1.70581	1.46577	0.908713
11	'M'	37	170	60	Left index finger'	62	96	-4	11	10	-13	-4	-43	-13	43	cgc2mbqvjtopa61rp29g.txt	0.544846	0.724458	0.287663	0.16973	0.0890429	0.0364083	0.0179784	0.0170167	0.0127579	0.00726125	0.0037194	0.00284456	0.0316751	0.0481358	0.0541275	0.0426014	0.0619005	0.168337	0.133567	0.12279	0.149113	0.215404	0.317152	0.304776	4.02797	3.57029	3.07924	2.47372	2.08668	2.36021	2.29064	1.85068	1.44822
6	'M'	68	172	70	Left index finger'	72	98	-20	13	52	0	-4	-19	4	-1	cgqi3dv2had7n67r854g.txt	0.446475	0.716455	0.417672	0.287775	0.147249	0.0800286	0.0545015	0.0349445	0.0217147	0.0147717	0.0110125	0.00867459	0.0394168	0.0638126	0.0568821	0.0698726	0.0655312	0.0709075	0.0836529	0.0873232	0.0855671	0.084583	0.107328	0.0832666	4.37664	4.14305	3.30255	2.75308	2.51617	2.32514	2.03797	1.7793	1.64795
9	'M'	46	175	70	Left index finger'	59	97	1	14	-10	-10	-24	25	26	-18	chd0dif2had9fa0hev1g.txt	0.560282	0.749703	0.24866	0.158499	0.0630093	0.0531508	0.0447306	0.0227253	0.00985699	0.00787985	0.00651838	0.00398322	0.023563	0.0296087	0.0527738	0.0403651	0.0997656	0.0942486	0.0551583	0.18897	0.137467	0.192114	0.105625	0.303201	4.01223	3.57058	3.11502	2.728	2.87042	2.25279	1.64671	1.74976	1.79755
18	'M'	51	172	80	Left index finger'	80	95	-3	17	-4	-28	-22	73	14	-27	cfu9j8avjtonbn3d3vgg.txt	0.529806	0.770109	0.266634	0.124675	0.0482858	0.0620598	0.0498407	0.0236034	0.0135657	0.0131166	0.0086771	0.00595424	0.0195751	0.0251834	0.03084	0.0758749	0.110243	0.0825661	0.105986	0.174226	0.303077	0.297807	0.351728	0.34725	4.03223	3.48331	3.08227	3.19361	3.21732	2.45931	1.9155	2.01156	1.58538
35	'M'	66	170	75	Left index finger'	70	98	3	13	-8	-31	-38	-31	2	-18	cb8bgov2hadbnne2ovq0.txt	0.585753	0.727121	0.248327	0.127473	0.0476986	0.0208585	0.0128305	0.0074754	0.00444654	0.00232321	0.00261772	0.00165658	0.0359333	0.0419703	0.0659315	0.102259	0.264798	0.2463	0.317077	0.466059	0.734574	0.45578	0.714001	0.812263	3.7897	3.35188	2.79382	2.21722	2.26586	2.29953	1.81409	2.04801	2.33029
18	'M'	59	165	65	Left index finger'	77	96	-5	20	15	-18	-14	16	-6	-33	cgqiu972had7n67r8l7g.txt	0.526249	0.796737	0.306225	0.177975	0.0843981	0.0665391	0.0403315	0.016869	0.0134882	0.00982095	0.00437744	0.00276316	0.0379749	0.0591821	0.148321	0.0905418	0.197627	0.0913419	0.12822	0.1902	0.203364	0.191575	0.247021	0.416563	4.18754	3.56184	3.04084	2.89745	2.52735	1.73745	1.57838	1.79461	1.28387
9	'M'	70	170	80	Left index finger'	77	90	-8	20	17	-45	-47	33	11	-35	cfg9fcqvjtonbn3ah5b0.txt	0.510333	0.770581	0.320282	0.120506	0.0339268	0.0329299	0.0233372	0.00926594	0.00744501	0.00634503	0.00371383	0.00251167	0.0210738	0.0279996	0.045445	0.0540311	0.0810524	0.0890557	0.0875651	0.162057	0.168768	0.176535	0.186604	0.184702	4.01964	3.25816	2.57999	2.65889	2.74953	2.28195	2.08463	2.08325	1.76224
0	'M'	41	182	90	Left index finger'	76	97	-19	11	27	32	-6	-9	6	-11	cdg7p6f2hadc1gjtdmh0.txt	0.440313	0.735404	0.357872	0.32777	0.161774	0.100899	0.0708975	0.039249	0.0181633	0.0110083	0.00769827	0.004606	0.0539494	0.0613248	0.104189	0.100256	0.141885	0.11152	0.137824	0.204603	0.279308	0.340184	0.295872	0.388177	4.3272	4.14193	3.28623	2.69973	2.45432	1.8316	1.21419	1.08922	1.01307
3	'M'	58	174	64	Left index finger'	80	94	-3	11	22	-38	-33	8	-26	-32	cgaimnqvjtopa61rdsh0.txt	0.540732	0.710792	0.328819	0.143032	0.0500224	0.0373194	0.0185023	0.00777188	0.00561324	0.0036364	0.00195528	0.00106151	0.0240213	0.0308751	0.0479848	0.104183	0.0624559	0.0574495	0.16228	0.190398	0.20293	0.213431	0.354334	0.547672	3.9537	3.42717	2.58275	2.69643	2.43519	1.81679	1.83091	1.83201	1.52487
9	'M'	60	180	90	Left index finger'	80	96	-16	24	51	-24	-21	-11	7	-24	chb0gtf2had61aganl9g.txt	0.460291	0.791464	0.417961	0.226624	0.0965642	0.0606746	0.0418936	0.020518	0.0131371	0.00934645	0.00575425	0.00366035	0.0369308	0.049991	0.0542235	0.0876277	0.0805958	0.0997226	0.109897	0.139087	0.113703	0.143751	0.135413	0.232108	4.34882	3.68491	2.99312	2.60284	2.34672	1.81819	1.52739	1.51533	1.21324
7	'M'	62	175	72	Left index finger'	70	98	-13	18	25	8	-19	-27	10	-9	cfqobtqvjtonbn3ci7og.txt	0.487727	0.739783	0.338408	0.264461	0.120402	0.0612263	0.0421057	0.025923	0.0140167	0.00864417	0.00611427	0.00422742	0.0426413	0.0503141	0.0740963	0.102804	0.127143	0.108463	0.0907814	0.149931	0.238552	0.194933	0.183715	0.237043	4.2158	3.95796	3.11096	2.5402	2.43771	2.10429	1.63049	1.40491	1.31161
10	'M'	61	172	80	Left index finger'	71	91	-19	-1	93	-23	-38	-5	26	-15	cge0oiv2had620d2g5o0.txt	0.45469	0.62015	0.510102	0.288899	0.101786	0.0597442	0.0514371	0.030378	0.0163154	0.0107558	0.00701213	0.00412237	0.0248941	0.0434275	0.0632356	0.0889873	0.167873	0.057717	0.0717652	0.207556	0.212868	0.175496	0.229701	0.328979	4.31179	3.97139	2.94714	2.57779	2.52488	2.02209	1.58051	1.31943	1.02091
24.5	'M'	58	165	54	Left index finger'	71	99	-8	21	28	-33	-14	30	-21	-25	cb7nmiv2hadbnne2mls0.txt	0.508536	0.784736	0.353563	0.162972	0.0757683	0.0680972	0.0350092	0.0168693	0.0158061	0.00956331	0.00419575	0.00308941	0.0135984	0.0233349	0.0162653	0.0351351	0.0210185	0.0418971	0.0829582	0.0560821	0.053227	0.110318	0.183267	0.199655	4.19307	3.59752	2.81599	2.90079	2.50796	1.8865	1.9669	1.74334	1.1483
7	'M'	76	170	78	Left index finger'	82	92	-3	17	8	-44	-20	30	-31	-14	cge0q7f2had620d2g6v0.txt	0.538832	0.754956	0.294429	0.114175	0.0467816	0.0430471	0.0223324	0.0111387	0.00738504	0.00460538	0.00285704	0.00174464	0.0380642	0.04775	0.122411	0.144062	0.165053	0.279613	0.343149	0.383508	0.372075	0.403345	0.479454	0.321817	3.91933	3.40461	2.58163	2.70346	2.47222	1.9075	1.92999	1.80765	1.1936
4	'M'	52	170	100	Left index finger'	56	95	0	13	-1	-19	-10	-28	42	21	cg0rb8ivjtonbn3dg820.txt	0.547367	0.724966	0.279031	0.155675	0.0775951	0.0376941	0.034418	0.028003	0.015947	0.00758603	0.00667026	0.00581811	0.0322839	0.0376266	0.053294	0.0589822	0.0720009	0.0546055	0.0587472	0.0819783	0.14643	0.156599	0.128071	0.132675	4.07579	3.54298	3.15855	2.6846	2.75425	2.72951	2.23249	1.79857	1.85109
15	'M'	73	168	67	Left index finger'	67	95	-1	20	-3	-41	-39	-6	0	-35	cgvr97v2had61ag6474g.txt	0.570291	0.748228	0.252402	0.104412	0.0345535	0.0200371	0.013184	0.00562811	0.00187423	0.00154446	0.00103325	0.000739868	0.0205832	0.030012	0.0261191	0.0290134	0.0731491	0.151442	0.105497	0.188321	0.337202	0.442991	0.475842	0.48021	3.75333	3.18219	2.59745	2.32866	2.49675	2.12985	1.71897	1.95424	2.70527
0	'M'	70	158	76	Left index finger'	56	89	-4	15	2	-30	-22	15	52	-8	chb0i3v2had61aganm6g.txt	0.534701	0.734036	0.284264	0.140534	0.0593811	0.0460489	0.0457163	0.027199	0.0138514	0.0140633	0.0111602	0.0063171	0.0233401	0.033542	0.0399987	0.0426609	0.0522777	0.0421189	0.0359214	0.0570716	0.0643903	0.0749462	0.0894625	0.154329	4.10068	3.52623	3.06015	2.81058	3.11442	2.68816	2.14661	2.18135	2.16121
9	'M'	60	180	80	Left index finger'	97	96	-8	16	34	-37	-62	74	-11	-48	chgvhecg0t88crmjavug.txt	0.512522	0.748455	0.360653	0.159712	0.0306808	0.0368556	0.0223588	0.00713292	0.00527372	0.00392095	0.00285231	0.00181849	0.0215194	0.0272082	0.0706283	0.0936651	0.0941475	0.0676362	0.0856564	0.240421	0.209389	0.331764	0.275355	0.421826	3.97481	3.50339	2.3893	2.31089	2.33368	1.50789	1.24183	1.35133	1.41656
15	'M'	54	175	84	Left index finger'	84	97	-6	0	55	-43	0	15	-27	1	cghvf9sg0t8edo0b5l10.txt	0.529502	0.650001	0.406391	0.164304	0.0819494	0.0674341	0.0320728	0.0209867	0.0134537	0.00915356	0.00628489	0.00416192	0.0239817	0.026047	0.0370052	0.0807777	0.0411019	0.0829673	0.1061	0.098733	0.128862	0.184461	0.225298	0.252155	4.15628	3.66273	2.82839	3.02829	2.44341	1.98135	1.96339	1.69055	1.48034
7	'M'	52	167	73	Left index finger'	87	98	-18	20	43	2	-30	-18	4	-13	cghvp7kg0t8edo0b5qs0.txt	0.450884	0.777166	0.402138	0.282535	0.106953	0.0601413	0.0407512	0.0222917	0.0120848	0.00840392	0.00604663	0.00491618	0.0410435	0.0581971	0.0416509	0.0691538	0.0967413	0.062071	0.130895	0.198071	0.399288	0.55904	0.562133	0.547026	4.29182	3.85696	2.91252	2.437	2.30816	1.73246	1.13374	1.20927	1.87057
21.5	'M'	60	175	70	Left index finger'	58	96	5	8	-8	-1	6	-21	18	24	chi9pekg0t88crmjimj0.txt	0.596609	0.690055	0.246216	0.166843	0.0973688	0.0522556	0.0397138	0.0321252	0.0200278	0.0123829	0.0105282	0.00835114	0.0260382	0.0300001	0.0295777	0.0262571	0.0525521	0.040477	0.0282303	0.0350973	0.0622531	0.0621308	0.0569556	0.0680959	4.05663	3.75397	3.41865	2.90786	2.77176	2.71531	2.36581	1.99944	1.97727
14	'M'	69	178	80	Left index finger'	72	98	-4	17	8	-9	-24	10	27	-10	cgqi74v2had7n67r8740.txt	0.549062	0.733617	0.279559	0.165933	0.080428	0.0552049	0.039517	0.0237509	0.0125317	0.00996235	0.00822782	0.00584851	0.105447	0.161935	0.200353	0.197917	0.334947	0.320095	0.270861	0.280256	0.410366	0.382309	0.468358	0.578332	4.09231	3.63388	3.00807	2.71829	2.86495	2.37786	1.87509	1.82752	1.9118
33	'M'	66	152	64	Left index finger'	80	94	0	17	8	-46	71	-8	-13	30	cc3d20sg0t8e9qh4vbn0.txt	0.557998	0.756608	0.29219	0.106173	0.0971046	0.0633917	0.0339903	0.0298441	0.0194812	0.0130673	0.00986571	0.00715271	0.0203623	0.0368535	0.0301129	0.0805554	0.0439474	0.0913658	0.052047	0.0551839	0.0877236	0.0641864	0.0558948	0.0720354	4.10869	3.59544	3.18847	3.23926	2.59924	2.45208	2.25267	1.83214	1.59941
15.5	'M'	43	175	60	Left index finger'	79	84	-5	4	23	-14	-34	16	15	-10	cg9cfb2vjtopa61r98r0.txt	0.532715	0.775931	0.228174	0.118856	0.105827	0.05848	0.0373131	0.023784	0.0209102	0.0123057	0.0237745	0.00741997	0.126568	0.186588	0.322672	0.530386	0.398424	0.766714	0.985167	0.622451	0.577672	0.771524	0.518011	0.61015	3.31682	3.36364	3.62613	2.7968	2.86649	2.59987	3.78985	3.17381	3.54934
5	'M'	54	165	55	Left index finger'	63	98	6	2	1	-10	-25	19	19	-14	ccql8j4g0t8fak1n5h30.txt	0.582204	0.731722	0.241507	0.171614	0.0674203	0.0523153	0.0446291	0.0254443	0.0146315	0.0120647	0.00968153	0.00703368	0.104102	0.18387	0.266559	0.18371	0.317412	0.246027	0.284214	0.280741	0.34427	0.476158	0.319545	0.547201	3.91613	3.82796	3.18822	2.73519	2.79481	2.55355	2.35777	2.1185	2.08043
14	'M'	54	166	73	Left index finger'	66	94	-3	20	6	-30	0	-12	-4	3	cgqivrf2had7n67r8m30.txt	0.526459	0.795453	0.315373	0.159552	0.0918846	0.0576226	0.0387789	0.0261924	0.0172943	0.0116217	0.00836159	0.0063991	0.105027	0.137577	0.174603	0.248139	0.270097	0.312185	0.303	0.287102	0.332367	0.27787	0.379517	0.383154	4.19538	3.591	3.16576	2.79667	2.52187	2.23286	2.03655	1.77439	1.58757
17	'M'	51	170	85	Left index finger'	78	94	-12	13	46	-19	-26	-6	13	-14	cfqo0p2vjtonbn3ci4a0.txt	0.494383	0.715432	0.396901	0.22309	0.0895898	0.0543774	0.0419564	0.0248979	0.0113941	0.00871668	0.00769431	0.00494999	0.0635912	0.075668	0.108318	0.156078	0.185729	0.274739	0.260963	0.242444	0.47807	0.528936	0.451238	0.817612	4.19376	3.7543	2.93128	2.43172	2.65354	2.16128	1.51869	1.44949	1.55755
8	'M'	62	165	70	Left index finger'	86	97	-13	8	68	-43	-63	73	-11	-44	cghvh1sg0t8edo0b5lv0.txt	0.47915	0.703946	0.463034	0.183863	0.0359922	0.0429447	0.0255229	0.00871409	0.00594162	0.0036848	0.00285095	0.00136367	0.0241443	0.0333125	0.0380576	0.0768451	0.0766609	0.0646843	0.133004	0.295063	0.239093	0.272357	0.259928	0.373565	4.13854	3.51705	2.43014	2.61253	2.23993	1.42434	1.3591	1.31954	1.22439
21.5	'M'	56	174	75	Left index finger'	85	97	-3	19	0	-27	-10	55	-8	-42	cfut7lqvjtonbn3d6i40.txt	0.537088	0.763863	0.275163	0.13442	0.0644283	0.0695166	0.0427185	0.0157326	0.0148761	0.0112443	0.00555614	0.00393908	0.0100136	0.01401	0.0202931	0.07971	0.0478436	0.0270803	0.0812941	0.123941	0.12334	0.0762028	0.121587	0.171281	4.07072	3.46312	3.06159	3.19267	2.82925	1.99518	1.84704	1.95887	1.38245
12	'M'	70	170	73	Left index finger'	69	90	-11	20	35	-19	-41	22	16	-25	cg0r5u72haddiqs209m0.txt	0.500823	0.761526	0.364957	0.205257	0.0632843	0.0546373	0.0428666	0.0209873	0.0103335	0.00918426	0.00625601	0.00394856	0.0447269	0.0699419	0.0705165	0.0776164	0.117115	0.0898199	0.110073	0.223048	0.219234	0.162323	0.221974	0.335674	4.20431	3.75314	2.84978	2.528	2.70524	2.05023	1.47534	1.62996	1.54291
23.5	'M'	88	175	73	Left index finger'	90	94	-3	16	2	-37	-58	27	17	-34	cdavb5n2hadc1gjsmt7g.txt	0.539981	0.752558	0.28326	0.121581	0.0276579	0.0251387	0.0189341	0.00788157	0.00370197	0.00270182	0.00186006	0.00117035	0.0160424	0.022094	0.0310945	0.0759402	0.160803	0.1359	0.093719	0.179192	0.23968	0.321435	0.428504	0.46936	3.87505	3.28618	2.55793	2.34242	2.74768	2.08268	1.68401	1.81745	1.72965
16	'M'	76	172	74	Left index finger'	61	96	-7	27	1	-46	-32	21	8	-21	cflmdnivjtonbn3bpv50.txt	0.517104	0.817003	0.277356	0.106184	0.0385662	0.0306324	0.0231811	0.0125861	0.00810587	0.00676204	0.00447358	0.00308362	0.0220282	0.0297077	0.0453328	0.0840197	0.0745242	0.0921615	0.09792	0.12776	0.13683	0.222489	0.344382	0.345032	3.97857	3.25199	2.64035	2.60201	2.76144	2.33549	2.00031	1.96326	1.7791
13	'M'	69	160	65	Left index finger'	80	94	0	10	2	-41	18	39	-28	-6	cflm6t2vjtonbn3bpt10.txt	0.562311	0.708526	0.278711	0.109113	0.0719664	0.0671416	0.0308901	0.0186006	0.0157893	0.00924424	0.00586761	0.00454047	0.0185894	0.028538	0.0489532	0.0964398	0.146671	0.0794863	0.150299	0.249446	0.22492	0.294001	0.412878	0.502006	3.97153	3.50911	2.9594	3.32361	2.72648	2.07534	2.24254	1.83427	1.41947
17	'M'	52	170	83	Left index finger'	77	98	2	10	8	-39	16	24	-40	-5	cbktei2vjtoh3rj0sog0.txt	0.574788	0.708403	0.30067	0.119096	0.0787309	0.0623067	0.0239344	0.0172556	0.0135033	0.0068382	0.00422708	0.00267954	0.0550247	0.0949547	0.110975	0.243861	0.257372	0.344487	0.458268	0.323455	0.384516	0.540645	0.508368	0.630761	3.9626	3.60769	2.9002	3.23505	2.37343	1.8797	2.07218	1.53649	1.32876
9	'M'	60	180	78	Left index finger'	54	94	4	5	-4	-5	-13	-18	37	17	cggl94cg0t8edo0am820.txt	0.587455	0.679135	0.25385	0.164966	0.078239	0.0441706	0.0406904	0.0312034	0.0207514	0.0142697	0.010841	0.00829029	0.0244884	0.0315671	0.0254107	0.0400387	0.0772171	0.0674515	0.0424354	0.0666197	0.103342	0.117151	0.131701	0.112946	4.01226	3.77586	3.26005	2.85538	2.96026	2.84643	2.42467	2.0841	1.93506
18	'M'	60	178	80	Left index finger'	65	96	-11	20	28	-1	0	-36	71	26	cbflbg4g0t87cj2o82i0.txt	0.499554	0.766821	0.345394	0.234822	0.127583	0.0572652	0.0619053	0.0518374	0.0275944	0.0118875	0.00937001	0.00725875	0.0473711	0.0666873	0.10767	0.0969263	0.114673	0.11078	0.0949349	0.0977241	0.117221	0.166894	0.210857	0.176328	4.31583	3.80674	3.43277	2.70443	2.72995	2.57047	1.90322	1.29607	1.31399
19	'M'	50	160	60	Left index finger'	68	98	6	9	-16	-11	-36	9	51	-21	cggl8icg0t8edo0am7p0.txt	0.604128	0.688549	0.220583	0.144164	0.0562387	0.0376657	0.0401123	0.02133	0.00683015	0.0054985	0.005281	0.00339188	0.0516968	0.0764491	0.123426	0.124854	0.215969	0.141146	0.17904	0.210624	0.281892	0.286377	0.383329	0.28041	3.81334	3.464	3.22939	2.71164	3.10457	2.37012	1.73317	1.77864	1.99597
10	'M'	65	170	62	Left index finger'	74	95	6	8	-10	-12	-44	18	0	-36	cfusgqf2haddiqs1qn10.txt	0.591703	0.70083	0.244448	0.1507	0.0450916	0.0356466	0.0238969	0.00991445	0.00445882	0.00316753	0.00214323	0.00167435	0.0230188	0.0279119	0.0303713	0.0490457	0.0491097	0.0397979	0.0500333	0.0927019	0.177895	0.235052	0.273845	0.462913	3.84307	3.47472	2.8224	2.57637	2.71415	2.03349	1.60432	1.89641	1.90809
14	'M'	75	160	60	Left index finger'	91	97	-4	24	0	-55	34	-19	-26	12	chmta84g0t8fl7e72b00.txt	0.52627	0.814276	0.273685	0.0826496	0.0594522	0.0322263	0.0151866	0.0113982	0.00655992	0.00299806	0.00234971	0.00149814	0.0118273	0.0198633	0.0190527	0.0528747	0.0515631	0.0636693	0.0769853	0.0709288	0.103219	0.169871	0.224566	0.373091	3.95022	3.07438	2.78753	2.75303	2.20684	2.14548	2.03595	1.60271	1.47956
2	'M'	58	180	75	Left index finger'	65	96	-6	17	17	-36	-50	32	-2	-37	cfqoak2vjtonbn3ci760.txt	0.52223	0.757371	0.318297	0.142411	0.0386025	0.0341025	0.0221386	0.00896476	0.00531071	0.00423414	0.00263303	0.00157921	0.0258693	0.0347403	0.0362102	0.0600458	0.072795	0.101141	0.0921842	0.123533	0.195724	0.215134	0.357932	0.48201	3.97852	3.43128	2.54106	2.35906	2.62054	2.00255	1.65429	1.89202	1.77656
17.5	'M'	67	166	60	Left index finger'	60	94	0	14	1	-21	-8	12	28	4	cg828vv2had4qgoq70a0.txt	0.552241	0.746317	0.27783	0.152782	0.0763551	0.0556839	0.0473097	0.0331021	0.022405	0.0169218	0.0130605	0.00989101	0.0402197	0.0523759	0.058666	0.0456329	0.0866328	0.0485219	0.0401485	0.0639462	0.0723796	0.0564866	0.0707737	0.0723437	4.12246	3.72347	3.27126	3.00797	3.001	2.66078	2.27859	2.07256	1.91574
7	'M'	69	170	79	Left index finger'	61	96	-5	22	-4	-47	-43	10	92	17	cfus9aqvjtonbn3d6cd0.txt	0.537723	0.782228	0.251874	0.0915681	0.0276889	0.0222843	0.0260441	0.0179587	0.01022	0.00800775	0.00655985	0.0042031	0.0301397	0.0466092	0.044838	0.116601	0.36363	0.389279	0.284956	0.239722	0.417215	0.511514	0.393163	0.521721	3.87652	3.1289	2.65352	2.45427	3.28118	3.05916	2.34693	2.28536	2.41049
7	'M'	47	185	101	Left index finger'	66	94	-12	5	53	-19	-20	0	0	-23	chc60472had61agb7nt0.txt	0.484986	0.665972	0.417405	0.252024	0.105883	0.0739909	0.0509384	0.0257652	0.0131861	0.00955888	0.00637453	0.00365342	0.0370928	0.0326119	0.059388	0.0709657	0.0804902	0.0787932	0.0937522	0.141175	0.128632	0.128584	0.147397	0.199244	4.23707	3.96303	3.04916	2.65299	2.55644	1.97461	1.47928	1.46006	1.3473
8	'M'	70	178	72	Left index finger'	60	96	-15	28	36	-22	-19	-26	62	6	cdcu6mn2hadc1gjsvf40.txt	0.473424	0.820042	0.37256	0.201115	0.0899212	0.0429283	0.0473248	0.0337622	0.0151405	0.00797169	0.00726649	0.00454282	0.0232067	0.0393798	0.0295648	0.0338497	0.0591109	0.0962015	0.0609798	0.0637245	0.109217	0.140212	0.149077	0.263518	4.27872	3.68222	3.03454	2.46687	2.73438	2.44714	1.73075	1.24417	1.43914
20	'M'	45	165	68	Left index finger'	66	92	-5	14	14	0	-12	-5	26	-3	cg81rm4g0t8d04b7p9j0.txt	0.53012	0.726338	0.311541	0.218051	0.104871	0.0670268	0.0562654	0.035744	0.017615	0.0119823	0.00961607	0.00604928	0.0224386	0.0245797	0.030239	0.0356727	0.0591988	0.0381059	0.0352814	0.0505939	0.0857849	0.0758053	0.0647451	0.0981483	4.23642	3.80223	3.2282	2.82342	2.85063	2.35691	1.72134	1.46337	1.65185
0	'M'	59	170	74	Left index finger'	88	94	6	9	0	-32	4	10	-42	11	cgn747f2had620d61j4g.txt	0.593196	0.714296	0.275429	0.124935	0.0686335	0.0522239	0.0191501	0.0136793	0.00920144	0.0045752	0.00309986	0.00214123	0.013014	0.0169459	0.0294204	0.0791046	0.0740875	0.0653621	0.1354	0.100307	0.135051	0.173047	0.205356	0.296739	3.89232	3.63073	2.77181	2.96691	2.30148	1.7841	2.11383	1.69383	1.37748
25	'M'	75	168	69	Left index finger'	60	98	-5	18	-6	-37	-22	64	44	-13	cgqimqn2had7n67r8g30.txt	0.524665	0.758667	0.265052	0.115333	0.0489471	0.050541	0.0512751	0.0316282	0.0143514	0.0125124	0.0119651	0.00701125	0.023788	0.0258795	0.0459831	0.0735544	0.232602	0.120586	0.056318	0.117902	0.218608	0.153131	0.102227	0.226413	4.07638	3.45365	3.07301	2.9296	3.30005	2.82787	2.18185	1.94429	2.19092
0	'M'	45	172	83	Left index finger'	66	95	-2	15	4	-11	-23	-2	31	-15	cdavifn2hadc1gjsmv9g.txt	0.542732	0.742243	0.28726	0.184071	0.0736972	0.0505053	0.0411868	0.0227575	0.00958672	0.00665433	0.0055844	0.00298514	0.0529956	0.0896011	0.0849161	0.126539	0.199721	0.107411	0.117413	0.225674	0.311868	0.300741	0.221857	0.468522	4.12063	3.55467	3.14678	2.58273	2.74655	2.29353	1.70277	1.38851	1.67163
0	'M'	67	163	45	Left index finger'	63	97	-16	42	21	-38	-46	56	3	-29	cbfl7fsg0t87cj2o81rg.txt	0.460462	0.933519	0.336861	0.136661	0.0404662	0.046006	0.0299787	0.0136495	0.0114322	0.00916963	0.0054406	0.00338641	0.0325426	0.0599925	0.0456593	0.120465	0.177665	0.133067	0.192639	0.463169	0.276093	0.18622	0.377885	0.448579	4.15845	3.36972	2.47561	2.67316	2.52973	1.84603	1.73948	1.79013	1.31449
7	'M'	59	175	65	Left index finger'	73	95	-18	19	24	25	-11	-12	27	-2	cfh1fiivjtonbn3an260.txt	0.445224	0.769453	0.351789	0.317117	0.161275	0.0990563	0.0810603	0.0519631	0.0271426	0.0212001	0.0145782	0.00795616	0.0986482	0.0996397	0.142305	0.185135	0.15059	0.170731	0.196355	0.213461	0.35863	0.275278	0.321711	0.398147	4.42168	4.05255	3.48178	2.80161	2.93108	2.27983	1.58409	1.4827	1.54471
2	'M'	56	170	74	Left index finger'	84	96	-7	8	35	-36	-42	-20	-7	-31	cg9ce62vjtopa61r98lg.txt	0.517752	0.698912	0.367452	0.165061	0.0530528	0.027754	0.0165627	0.00719041	0.00395515	0.00284439	0.00190664	0.00127091	0.0204687	0.0212095	0.029857	0.0430845	0.0662547	0.0808646	0.0914342	0.163152	0.181508	0.248558	0.289146	0.57735	4.01293	3.42832	2.5645	2.35064	2.25754	1.82002	1.70659	1.98513	1.65865
0	'M'	61	180	75	Left index finger'	63	97	-4	14	9	-20	-37	11	14	-23	cck1662vjtoo7op4vqqg.txt	0.533062	0.735064	0.300743	0.170428	0.0599434	0.0444695	0.0348256	0.01734	0.0101675	0.00870601	0.00501415	0.00301925	0.0233373	0.0503278	0.0395104	0.0903503	0.0752129	0.0893492	0.0919462	0.146758	0.140186	0.189713	0.24867	0.472178	4.08384	3.56823	2.88185	2.61873	2.81406	2.28983	1.89588	2.09824	1.89281
17.5	'M'	52	173	75	Left index finger'	72	98	3	6	-4	2	-27	-5	11	-11	cb8be5n2hadbnne2ovag.txt	0.582587	0.682777	0.258299	0.185442	0.0757058	0.0495727	0.0363812	0.0210344	0.0118832	0.00833198	0.00550788	0.00372688	0.0296849	0.0418017	0.0643431	0.0861204	0.121211	0.0753137	0.0798752	0.153986	0.15184	0.127617	0.151849	0.25745	4.00021	3.71738	3.08528	2.73437	2.83072	2.35414	1.93647	1.91937	1.93138
10	'M'	56	178	66	Left index finger'	61	96	-8	19	17	-22	-22	-6	38	-6	cg0rcmf2haddiqs20aug.txt	0.508354	0.777139	0.323309	0.176867	0.0765315	0.0459106	0.043815	0.027739	0.0120967	0.00868077	0.00693419	0.00452243	0.0631588	0.0761536	0.0866578	0.10807	0.135904	0.10169	0.123356	0.145586	0.253697	0.184853	0.201674	0.293181	4.14459	3.59026	2.98161	2.54965	2.84426	2.42578	1.80845	1.43148	1.55067
32	'M'	67	170	70	Left index finger'	61	96	-13	31	28	-32	-29	12	13	-18	cgchr1kg0t8d04b8gu30.txt	0.483719	0.84891	0.347439	0.164746	0.0636153	0.0480525	0.0361074	0.0193905	0.0117141	0.00952516	0.00685608	0.00385629	0.0240078	0.0290091	0.042245	0.054422	0.0810199	0.061338	0.0727292	0.142455	0.165804	0.209914	0.293345	0.47081	4.20425	3.51156	2.84071	2.53093	2.56612	2.13219	1.62834	1.5882	1.54083
7	'M'	54	172	95	Left index finger'	71	98	-19	17	30	32	-19	-19	20	-18	cb8bbkavjtoh3rj01iag.txt	0.455797	0.737744	0.348203	0.324774	0.143049	0.0765244	0.0593523	0.0329069	0.0168803	0.0125679	0.0079975	0.00440085	0.0365465	0.0438163	0.0616546	0.0573624	0.0737271	0.0546217	0.0857305	0.0964845	0.129301	0.147036	0.239198	0.332057	4.33746	4.07664	3.23668	2.63723	2.64856	2.1502	1.58177	1.44812	1.40041
7	'M'	54	171	67	Left index finger'	72	94	-17	18	72	-20	-11	8	18	13	cfpeiq72haddiqs1c60g.txt	0.47793	0.705538	0.453435	0.253019	0.116872	0.0897963	0.0724373	0.0536442	0.040574	0.0300961	0.0234234	0.0188899	0.0974259	0.119181	0.118001	0.147479	0.224666	0.21115	0.195306	0.265769	0.250799	0.269702	0.28499	0.293846	4.37485	4.20696	3.35445	3.16283	3.10099	2.69912	2.40237	2.13953	1.86436
10	'M'	35	175	110	Left index finger'	87	95	-3	7	19	-21	-58	-4	28	-26	cgc2nicg0t8d04b8cq8g.txt	0.547081	0.683673	0.330968	0.171833	0.0388643	0.0242856	0.0220251	0.0102741	0.0032989	0.0031496	0.00258675	0.00158981	0.0329898	0.052173	0.081339	0.0924394	0.24166	0.217135	0.183127	0.331082	0.456562	0.443793	0.570739	0.624947	3.85534	3.56015	2.53134	2.03814	2.49724	2.00684	1.1368	1.70264	1.86533
15	'M'	65	172	79	Left index finger'	78	97	0	12	0	-29	-2	37	-14	-15	chmt21sg0t8fl7e72750.txt	0.55952	0.725601	0.255548	0.113706	0.0596388	0.059211	0.030516	0.0166765	0.0163896	0.00936109	0.00648839	0.0057327	0.0209958	0.0324809	0.0665965	0.16409	0.203387	0.148332	0.253225	0.364246	0.295241	0.441299	0.545698	0.655787	3.96725	3.4922	2.94411	3.35433	2.76409	2.09038	2.32129	2.07089	1.64725
28	'M'	51	169	70	Left index finger'	66	93	-14	36	39	-32	-5	18	0	-7	chc5u9sg0t889ug9rsu0.txt	0.490298	0.869794	0.37028	0.16921	0.0974159	0.082859	0.0544197	0.0336088	0.0238205	0.0184025	0.0134753	0.00923869	0.0193398	0.0243141	0.0192516	0.0489108	0.0671249	0.0613907	0.0754291	0.0985427	0.123552	0.118069	0.140383	0.178186	4.30508	3.72914	3.0662	3.10115	2.65004	2.1415	1.80862	1.55253	1.20066
13	'M'	71	170	80	Left index finger'	59	95	-13	29	25	-26	-16	4	54	2	cc23qd2vjtoqui5tp3dg.txt	0.477888	0.834906	0.350684	0.177858	0.0772832	0.0577517	0.0620929	0.0419264	0.0151785	0.0070218	0.00984347	0.0054475	0.0551683	0.0906949	0.0522391	0.0997744	0.130367	0.256619	0.0968318	0.160535	0.367893	0.40877	0.201457	0.277128	4.22424	3.54052	3.01947	2.6528	3.0326	2.21169	1.28171	0.591682	1.55553
16	'M'	74	171	86	Left index finger'	65	98	-14	34	20	-52	-59	43	37	-21	cgn2d2cg0t8edo0cj26g.txt	0.470658	0.875244	0.334286	0.112349	0.0245679	0.0224774	0.0212445	0.0108558	0.00466613	0.00474001	0.00291871	0.00169425	0.0129054	0.0160992	0.0176826	0.030757	0.0537942	0.041712	0.0409247	0.0904921	0.243149	0.210899	0.208688	0.242568	4.02696	3.15964	2.27638	2.16689	2.68927	2.13898	1.56163	1.4998	1.49208
9	'M'	54	163	70	Left index finger'	89	95	0	12	8	-8	-50	55	9	-52	cfvgnv2vjtonbn3d97qg.txt	0.555955	0.738254	0.294218	0.182142	0.0454921	0.056555	0.0366906	0.00944755	0.00711783	0.00759268	0.00385894	0.00180643	0.0230703	0.031435	0.0651001	0.0858046	0.132984	0.102036	0.114577	0.430079	0.410136	0.308667	0.502193	0.633915	3.99217	3.66555	2.82709	2.43371	2.52199	1.64556	1.0993	2.08109	1.41524
31	'M'	56	174	71	Left index finger'	82	95	-2	17	13	-49	32	4	-42	21	cca1ntn2hadcsjhio9rg.txt	0.543818	0.754936	0.314393	0.109734	0.0793053	0.0566946	0.0214223	0.0170974	0.0117065	0.00594874	0.0041705	0.00275245	0.0116861	0.0240282	0.0363035	0.111785	0.0829877	0.126208	0.150909	0.0774564	0.180348	0.201909	0.118551	0.277188	4.04522	3.48271	2.77181	3.05322	2.31213	1.99453	2.06201	1.6471	1.53009
28	'M'	49	173	87	Left index finger'	58	97	0	10	-5	9	-6	-43	19	36	cgvqtbf2had61ag63ve0.txt	0.563794	0.703351	0.255091	0.191947	0.0995904	0.0378273	0.0289235	0.0267978	0.0161876	0.00724775	0.00453252	0.00373764	0.0432664	0.0537843	0.0487503	0.0271093	0.0510882	0.091472	0.0731106	0.0688639	0.0924576	0.129958	0.175129	0.186637	4.05074	3.67963	3.25108	2.60956	2.45603	2.66385	2.22999	1.69207	1.52389
30	'M'	60	165	68	Left index finger'	60	96	-15	30	34	-20	-5	-26	62	26	chgvmdf2had9fa0ip4q0.txt	0.467275	0.850847	0.369183	0.201487	0.10374	0.0511787	0.0574077	0.0469862	0.0257245	0.0147311	0.0109665	0.00915915	0.0285816	0.0404046	0.0450193	0.0438204	0.0753883	0.095509	0.0594529	0.0574861	0.114285	0.128965	0.0997447	0.139415	4.36263	3.7452	3.20878	2.69086	2.78386	2.65587	2.0852	1.5791	1.43986
15	'M'	59	170	81	Left index finger'	79	95	-2	10	22	-32	-6	6	-19	-14	cc3d0d4g0t8e9qh4vb80.txt	0.54809	0.709656	0.331509	0.15539	0.0799703	0.0596715	0.0314985	0.017614	0.013368	0.00872524	0.00527763	0.0033668	0.0150207	0.0198659	0.0256735	0.0427789	0.0402096	0.0382424	0.0580846	0.0617744	0.0859387	0.108591	0.154449	0.234739	4.10353	3.63689	2.9432	2.92308	2.52221	2.02939	1.93939	1.81026	1.61593
0	'M'	60	176	68	Left index finger'	66	95	2	9	-7	12	-18	-34	14	13	cg207ev2had4qgop8e60.txt	0.561486	0.704815	0.262546	0.203711	0.0869456	0.0390519	0.0299658	0.0206665	0.0115906	0.00596184	0.004194	0.00319435	0.0258338	0.0375929	0.0860973	0.0680623	0.156928	0.108089	0.105418	0.156086	0.309154	0.332816	0.323664	0.444715	4.02831	3.76931	3.15571	2.54548	2.60339	2.46329	2.01675	1.64439	1.63541
14	'M'	52	165	67	Left index finger'	61	92	-1	12	-6	-28	5	-4	83	30	ch3r9kf2had61ag7qjvg.txt	0.548312	0.717923	0.254662	0.129486	0.0725444	0.0503806	0.0603204	0.0484576	0.0272442	0.0159332	0.0156761	0.0126659	0.0188186	0.0264515	0.025734	0.029648	0.0367371	0.0844526	0.0654001	0.0328903	0.108309	0.0621475	0.0756291	0.0618157	4.10459	3.58893	3.339	3.07553	3.36537	3.0283	2.35906	1.85456	1.95002
10	'M'	60	165	65	Left index finger'	67	96	-6	19	7	-24	-36	48	10	-31	cfu94hqvjtonbn3d3rv0.txt	0.522429	0.76958	0.292176	0.151023	0.0522028	0.0546959	0.0391441	0.0170171	0.0106606	0.00950712	0.0052084	0.00247209	0.0145251	0.0282749	0.0253164	0.0320375	0.0584338	0.0451418	0.0685989	0.125798	0.111485	0.129339	0.17944	0.231757	4.09016	3.44189	2.89532	2.81903	2.92021	2.12988	1.59711	2.0049	1.68687
7	'M'	71	171	69	Left index finger'	60	97	-4	18	0	-34	-17	18	53	-6	cg8nj772had4qgoqaa70.txt	0.532177	0.752411	0.281319	0.129908	0.0594828	0.0479566	0.0483904	0.0291238	0.0112566	0.0135981	0.0119535	0.00606716	0.024885	0.0346119	0.0413159	0.0560862	0.0912226	0.0719982	0.0591751	0.104353	0.12075	0.133992	0.0941936	0.163274	4.08777	3.5145	3.09274	2.8411	3.1139	2.619	1.9556	1.95085	2.16981
32.5	'M'	76	167	64	Left index finger'	78	98	-7	21	11	-34	-36	17	14	-34	cbkth24g0t87cj2ol0kg.txt	0.51199	0.781327	0.323229	0.161658	0.0540389	0.0367326	0.0316044	0.0142059	0.0112701	0.00919511	0.0058736	0.00364803	0.124653	0.161111	0.340832	0.313351	0.72225	0.474928	0.344882	0.543035	0.675123	0.445282	0.510481	0.58559	3.96721	3.42031	2.70281	2.23461	2.67534	2.42036	2.1864	2.60652	2.18271
3	'M'	51	176	76	Left index finger'	96	95	-13	23	48	-44	-33	-2	-21	-27	cgvriq72had61ag64ctg.txt	0.472208	0.807452	0.41174	0.170335	0.0575282	0.0395823	0.0210602	0.0090857	0.00562665	0.00307779	0.00166707	0.00137624	0.0341452	0.0462598	0.0576627	0.103383	0.0876754	0.0849657	0.177599	0.266261	0.341859	0.431772	0.527534	0.706775	4.14871	3.43292	2.49343	2.31335	1.92306	1.30419	1.25331	1.11984	1.12422
12	'M'	35	169	85	Left index finger'	81	94	3	6	-1	-38	23	28	-33	-25	cghvr9n2had620d48v7g.txt	0.591294	0.686038	0.241481	0.108013	0.0631668	0.0589643	0.0294554	0.0100252	0.0106889	0.00591554	0.00253332	0.003538	0.0371641	0.0429564	0.0771658	0.0854945	0.159975	0.0973203	0.181593	0.233233	0.211895	0.353621	0.524074	0.672821	3.77534	3.46602	2.89347	3.21545	2.75333	1.87082	1.94009	1.88003	1.13406
2	'M'	55	172	78	Left index finger'	61	97	-5	16	6	-12	-26	-16	77	7	cdav5cv2hadc1gjsmr80.txt	0.527002	0.746687	0.292435	0.173715	0.0666863	0.0415592	0.0471742	0.0310741	0.0135091	0.0112739	0.00915258	0.00492869	0.0140887	0.0250566	0.0168078	0.0363467	0.0855359	0.147024	0.0658711	0.0813582	0.103503	0.130005	0.115326	0.177283	4.11533	3.63516	3.10399	2.55126	3.06104	2.68513	1.95973	1.69036	2.00705
24	'M'	52	170	78	Left index finger'	81	96	-3	13	13	-35	-50	39	-21	-51	cg3fbk72had4qgopfm80.txt	0.535719	0.749353	0.308963	0.141221	0.0337139	0.0343815	0.0183761	0.00483633	0.00385946	0.00265502	0.00150965	0.00145351	0.040933	0.0394645	0.0813286	0.0829426	0.166753	0.105434	0.136062	0.326058	0.347818	0.415082	0.531355	0.617429	3.86919	3.36038	2.40745	2.73704	2.24759	1.34188	1.33936	1.67202	1.15385
20	'M'	71	180	73	Left index finger'	60	94	5	3	-4	-6	-8	-33	-7	31	chgve4f2had9fa0iovlg.txt	0.611557	0.64914	0.252445	0.159836	0.0804857	0.0384726	0.02357	0.0196952	0.0152331	0.0100128	0.00723536	0.00571296	0.0313844	0.0393774	0.0280878	0.0385791	0.0734819	0.117167	0.139041	0.103618	0.132054	0.197608	0.224842	0.263086	3.91723	3.63761	3.26389	2.77258	2.57404	2.60394	2.5287	2.28486	2.06026
10	'M'	37	178	87	Left index finger'	76	93	2	3	20	-25	-26	24	-12	-25	chgvp0f2had9fa0ip5u0.txt	0.569593	0.662297	0.332263	0.168427	0.0669875	0.0576399	0.0319292	0.0158142	0.00954982	0.00626043	0.00453405	0.00262065	0.015516	0.0197867	0.0366387	0.083109	0.0618337	0.0586502	0.150473	0.140721	0.130116	0.167405	0.234548	0.359727	3.99732	3.78778	2.90596	2.84042	2.61335	2.04212	1.83859	1.67967	1.52992
17	'M'	50	170	62	Left index finger'	56	98	-4	17	1	-19	-30	-2	46	-1	cfi8vd72haddiqs0ss50.txt	0.531114	0.759646	0.282326	0.15715	0.0598967	0.0381716	0.0379223	0.0245442	0.00990764	0.00754344	0.00748515	0.00507863	0.0292705	0.0332642	0.0393476	0.0455333	0.0810701	0.0506389	0.0532097	0.0640939	0.109404	0.123249	0.106254	0.160715	4.07129	3.53398	3.01518	2.49814	2.86808	2.52397	1.91692	1.65343	1.99828
8	'M'	61	160	53	Left index finger'	66	96	-9	21	22	-23	-30	19	16	-37	cfqofsavjtonbn3ci94g.txt	0.500402	0.790246	0.345111	0.183343	0.0690234	0.0588802	0.0444148	0.0165766	0.00641522	0.00918906	0.00643372	0.00253881	0.030279	0.0464653	0.040244	0.0404965	0.0945561	0.060835	0.101895	0.17106	0.16296	0.165084	0.234582	0.383924	4.20266	3.55431	2.86836	2.56921	2.74406	1.99492	1.28468	1.76076	1.60035
18	'M'	48	174	90	Left index finger'	60	95	-5	20	6	-14	-8	-44	69	34	cfu96lavjtonbn3d3scg.txt	0.533424	0.763889	0.282717	0.170254	0.0789074	0.0333015	0.0375835	0.0313755	0.0143722	0.00634571	0.00575058	0.00518044	0.0629186	0.103186	0.0772271	0.107328	0.19236	0.0559403	0.0789632	0.154637	0.271002	0.260172	0.206311	0.216159	4.08465	3.53837	3.12249	2.55227	2.78459	2.5788	1.85156	1.2732	1.81681
11	'M'	71	170	64	Left index finger'	68	93	0	15	21	-29	3	38	1	0	cgn77rv2had620d61l5g.txt	0.569284	0.715748	0.311948	0.14456	0.0867247	0.0818569	0.0529287	0.0353814	0.0286299	0.0217377	0.0157732	0.0119215	0.063608	0.0992406	0.0831109	0.145606	0.102536	0.0903489	0.120983	0.111688	0.11118	0.128034	0.135798	0.119246	4.12939	3.88895	3.2893	3.36328	3.01851	2.55058	2.41417	2.20359	1.85992
17	'M'	63	173	85	Left index finger'	70	94	-1	18	-8	-52	-34	51	-25	-31	cgvrk7n2had61ag64dog.txt	0.549618	0.768722	0.247056	0.0870534	0.0237995	0.0280828	0.0151191	0.00534848	0.00439471	0.00290903	0.00129577	0.00074484	0.0165317	0.0201095	0.0165331	0.0796785	0.0698138	0.0277976	0.124384	0.169726	0.174973	0.257535	0.471754	0.441608	3.77709	3.14903	2.44589	2.75036	2.75705	2.11302	2.04011	2.30051	1.90121
28.5	'M'	79	170	90	Left index finger'	62	97	0	13	-6	-37	-33	70	22	-21	cghvq8kg0t8edo0b5ru0.txt	0.543191	0.756872	0.240073	0.104533	0.0380855	0.0495061	0.0365926	0.0167644	0.0120304	0.0104528	0.00606472	0.00423218	0.0684433	0.105406	0.211006	0.258464	0.22761	0.217833	0.271889	0.362628	0.368949	0.346774	0.394807	0.40649	3.94922	3.33907	2.89285	3.20676	3.22838	2.5149	2.1205	2.40266	2.05395
2	'M'	61	182	88	Left index finger'	58	91	-8	19	20	-18	-45	31	8	-40	cfusc02vjtonbn3d6d70.txt	0.512654	0.764798	0.333362	0.186018	0.0555562	0.0507	0.0350537	0.0136459	0.00932528	0.00730515	0.00421935	0.00247424	0.0176552	0.0261864	0.0178079	0.082691	0.115842	0.0427911	0.13283	0.198687	0.0631036	0.163309	0.185353	0.214858	4.09907	3.65455	2.7224	2.52052	2.67031	1.94583	1.62664	1.84614	1.46673
11	'M'	47	170	80	Left index finger'	67	93	-1	14	-4	-18	-44	17	36	-27	cg8nkav2had4qgoqaap0.txt	0.550558	0.742052	0.254235	0.145672	0.0462242	0.0304406	0.0300424	0.0175377	0.00432521	0.00449859	0.00456616	0.00228988	0.0248925	0.0294914	0.0409971	0.0556622	0.116877	0.089	0.0609476	0.139633	0.356607	0.181967	0.157384	0.426061	3.93908	3.40342	2.8677	2.4307	2.94776	2.51965	1.75466	1.44712	2.28465
18.5	'M'	65	170	75	Left index finger'	55	89	3	11	-5	-13	-21	-36	31	8	cgiia8cg0t8edo0bb6r0.txt	0.570896	0.734363	0.259487	0.157198	0.0694076	0.0299304	0.0253017	0.018417	0.0113179	0.00760864	0.00576998	0.00422888	0.0516535	0.0539088	0.0658053	0.0498099	0.0821594	0.075614	0.0729216	0.0716435	0.091074	0.114198	0.128497	0.118131	3.95236	3.61767	3.05957	2.49985	2.51961	2.5257	2.11562	1.83757	1.69659
1	'M'	59	168	65	Left index finger'	92	92	-8	18	27	-24	-12	-13	6	12	cbortvavjtoqui5si3b0.txt	0.518599	0.745822	0.335239	0.175364	0.0854861	0.0506181	0.0352589	0.0259595	0.018699	0.0137294	0.0103145	0.00805272	0.0152872	0.0243879	0.0243416	0.0372334	0.0918013	0.054622	0.0337798	0.041352	0.0610415	0.0700532	0.06275	0.0762972	4.198	3.70673	3.14237	2.77494	2.62343	2.46121	2.22846	1.97162	1.74267
15	'M'	42	180	89	Left index finger'	78	93	-9	19	26	-8	-20	12	8	-18	cg3f6h4g0t8d04b77e4g.txt	0.499278	0.772184	0.347455	0.230482	0.0974415	0.0739919	0.0539156	0.0293082	0.0132377	0.00962388	0.00679288	0.0036355	0.0321877	0.022477	0.0503146	0.0806034	0.121058	0.158931	0.168077	0.180121	0.218466	0.222117	0.224695	0.307754	4.24038	3.81238	3.0445	2.76801	2.6011	1.98709	1.27684	1.11112	1.11733
11	'M'	56	166	66	Left index finger'	53	95	-2	15	1	-22	-12	-16	41	14	cflmb6avjtonbn3bpudg.txt	0.545669	0.732888	0.27595	0.146118	0.0704598	0.039094	0.0369531	0.0278982	0.0168905	0.0121542	0.0110131	0.00902479	0.027376	0.0570518	0.0434908	0.0551684	0.0870958	0.106303	0.0675706	0.0978908	0.18923	0.148323	0.110672	0.179014	4.08685	3.59413	3.14452	2.728	2.92671	2.84727	2.39133	2.08175	2.11148
13	'M'	55	172	80	Left index finger'	81	94	-13	30	30	-31	-42	35	-11	-49	cfe90qsg0t8desl5tgj0.txt	0.481532	0.841977	0.3589	0.174683	0.0546358	0.0504662	0.0307111	0.00984758	0.00820977	0.00648066	0.00301941	0.0022148	0.0232154	0.025963	0.038682	0.118177	0.0742317	0.0634096	0.134967	0.137557	0.21177	0.177168	0.252693	0.294185	4.18835	3.43109	2.66339	2.60213	2.35712	1.5961	1.56535	1.55181	0.97952
16	'M'	58	168	72	Left index finger'	57	97	-1	13	-8	-34	-35	65	38	-26	cgqintv2had7n67r8gp0.txt	0.558271	0.714661	0.248394	0.112504	0.0420023	0.0463445	0.0415718	0.019784	0.0139766	0.0140277	0.0087148	0.00517857	0.0120588	0.0187515	0.0112617	0.0297523	0.0808075	0.0466498	0.0490009	0.108669	0.095447	0.0793138	0.118949	0.135745	3.95495	3.44487	2.96847	2.98212	3.22743	2.67581	2.24374	2.56842	2.24575
17	'M'	78	163	61	Left index finger'	53	94	-13	24	29	-28	-24	-29	47	12	cfqodh2vjtonbn3ci8b0.txt	0.485075	0.797451	0.352631	0.175792	0.0720479	0.0340362	0.0332892	0.0242723	0.0105478	0.00670517	0.00609324	0.00398181	0.0233624	0.0322149	0.042539	0.0584446	0.128809	0.0875252	0.0785541	0.141564	0.287212	0.17656	0.188106	0.328188	4.19721	3.56605	2.88976	2.34087	2.6202	2.45461	1.88889	1.53906	1.87268
7	'M'	53	180	80	Left index finger'	71	94	-5	15	16	-1	-24	7	23	-23	chcbbtsg0t882og8t6qg.txt	0.503144	0.76212	0.341202	0.234551	0.0967731	0.0710218	0.0570016	0.0285588	0.0114393	0.00742109	0.00570233	0.00342866	0.046705	0.0628895	0.0648119	0.071015	0.121363	0.118073	0.0812737	0.160244	0.194371	0.146052	0.218747	0.30025	4.21229	3.81294	3.04879	2.60245	2.65223	1.88981	1.18258	1.15567	1.21805
16	'M'	41	176	100	Left index finger'	69	97	-4	19	12	-8	-4	36	17	-24	cfqoh0avjtonbn3ci9jg.txt	0.524861	0.773415	0.313044	0.200143	0.104565	0.0979817	0.0757449	0.0370681	0.0174127	0.0148182	0.010485	0.00553682	0.0423811	0.0547206	0.0625975	0.134044	0.13484	0.11591	0.0833897	0.128801	0.146512	0.131638	0.131111	0.286898	4.28264	3.68747	3.35123	3.09761	2.96738	2.18203	1.52842	1.5456	1.51135
26	'M'	50	174	93	Left index finger'	71	97	-11	16	16	24	-24	-24	41	1	cbtevrqvjtoqui5t4r50.txt	0.491015	0.758655	0.321522	0.278932	0.112551	0.0571317	0.0536407	0.0349747	0.0165513	0.0113358	0.00816253	0.0045616	0.0392255	0.0562653	0.0478596	0.0653784	0.0667903	0.0914991	0.0528491	0.0701541	0.11975	0.194128	0.240302	0.359828	4.25537	3.94535	3.17827	2.62716	2.72664	2.28625	1.63503	1.31785	1.48149
20	'M'	78	170	65	Left index finger'	56	95	4	9	-5	-18	-24	-51	19	26	cfpeldivjtonbn3cc65g.txt	0.578845	0.708454	0.257696	0.146277	0.0582459	0.0179831	0.0145264	0.0118988	0.00705703	0.0041444	0.00199986	0.00128169	0.0299066	0.0238497	0.0316875	0.0345878	0.0380046	0.118137	0.107647	0.0892375	0.0931156	0.176233	0.245775	0.346952	3.84168	3.45134	2.82649	2.21787	2.29886	2.72604	2.39125	2.03104	1.82945
19	'M'	67	180	102	Left index finger'	58	98	-7	22	3	-37	-51	47	43	-26	cb7nhl4g0t87cj2nn56g.txt	0.509507	0.795407	0.285653	0.122322	0.0308383	0.031893	0.0307033	0.0140647	0.00734417	0.00782907	0.00505618	0.00261722	0.012754	0.0202665	0.0265423	0.0628058	0.168186	0.125964	0.0486235	0.186264	0.197029	0.111365	0.224087	0.260878	3.99466	3.28744	2.64582	2.35999	3.11429	2.39728	1.85941	2.28568	2.10297
26	'M'	69	170	74	Left index finger'	69	96	-7	12	35	-26	-10	39	-9	-9	cgn2ebkg0t8edo0cj2pg.txt	0.519567	0.739233	0.354655	0.181237	0.0825208	0.0811991	0.0476792	0.0253092	0.0213712	0.0157718	0.0106795	0.00813767	0.0184512	0.026993	0.0264337	0.0236886	0.0306612	0.0338171	0.0520096	0.0656021	0.0562711	0.0855465	0.11681	0.1353	4.25769	3.80904	3.04847	3.09482	2.80462	2.21224	2.22579	2.13839	1.83325
3	'M'	71	178	70	Left index finger'	63	95	-1	18	-8	-40	-49	25	35	-27	cg3f2acg0t8d04b77de0.txt	0.551894	0.765139	0.248922	0.100973	0.0252145	0.0218078	0.0195945	0.00822412	0.00422719	0.00458812	0.00325708	0.00141583	0.036191	0.0336171	0.0584881	0.073459	0.207098	0.161583	0.123825	0.363797	0.330402	0.181094	0.291868	0.609359	3.78964	3.17729	2.54137	2.24783	3.00233	2.45919	1.82366	2.54103	2.26517
6	'M'	53	170	80	Left index finger'	60	97	-14	33	11	-40	-57	-33	100	-3	cgglakcg0t8edo0am8ig.txt	0.471909	0.866227	0.315018	0.128752	0.0286555	0.0150815	0.0193142	0.0112086	0.00271894	0.00232919	0.00290579	0.00206022	0.0382084	0.0510086	0.0424792	0.0525588	0.199737	0.202179	0.0829314	0.112961	0.389756	0.49555	0.44454	0.450911	3.9608	3.02384	2.22216	1.29121	3.76442	2.60327	1.5758	1.79557	3.36587
8	'M'	62	173	80	Left index finger'	68	97	1	11	-6	-20	-23	16	18	-24	cfs66o2vjtonbn3cpqi0.txt	0.562369	0.730288	0.257588	0.143749	0.057846	0.0416271	0.0334977	0.0167691	0.00896285	0.00606559	0.0039845	0.00296596	0.0235427	0.0299973	0.0373969	0.0534188	0.0992593	0.0787046	0.0615853	0.115173	0.132982	0.215796	0.243176	0.242518	3.9612	3.45628	2.98429	2.65812	2.80209	2.28055	1.77932	1.75016	1.84063
2	'M'	66	175	80	Left index finger'	71	96	-2	23	-18	-51	-14	37	-33	-51	cfi6upavjtonbn3avbqg.txt	0.540743	0.800578	0.219014	0.0711776	0.0361169	0.0348179	0.0148439	0.00487693	0.00594544	0.00260495	0.000856915	0.00133977	0.00609219	0.00952877	0.0269211	0.0508779	0.0658995	0.0599936	0.125873	0.2457	0.154566	0.300516	0.500712	0.462902	3.76342	3.07027	2.55409	3.02043	2.49467	1.75694	2.48854	2.0739	1.36632
11	'M'	60	172	73	Left index finger'	83	99	-25	8	100	-10	-68	0	59	-43	cfu9bi72haddiqs1p7dg.txt	0.412936	0.703084	0.57101	0.363841	0.0648758	0.0404403	0.0452104	0.0158023	0.0122569	0.00970346	0.00643591	0.00403798	0.0128974	0.01251	0.0209532	0.0402998	0.11851	0.110325	0.0420818	0.0862886	0.0750214	0.118436	0.120505	0.1741	4.28725	3.98084	2.64024	1.39309	2.79648	1.76394	1.18231	1.38665	0.961388
38	'M'	60	172	84	Left index finger'	61	98	1	13	-6	-9	-6	-26	38	0	cbaavof2hadbnne30g2g.txt	0.564498	0.732318	0.258328	0.168317	0.0841129	0.0417815	0.0393164	0.0260774	0.0113394	0.00765619	0.0072127	0.00482483	0.0416959	0.060212	0.0980803	0.0688142	0.136161	0.153933	0.0770805	0.145872	0.280256	0.320918	0.23052	0.453277	4.03957	3.50639	3.30223	2.62731	2.82188	2.50636	1.79909	1.44256	1.98566
14	'M'	72	174	82	Left index finger'	92	99	-3	16	9	-53	-7	26	-40	-13	cbab3rsg0t87cj2nsujg.txt	0.520093	0.775227	0.312831	0.09513	0.0470386	0.040653	0.0156327	0.00868477	0.00562453	0.00322978	0.00213913	0.00143191	0.0194176	0.0239055	0.0446947	0.17941	0.0954849	0.0805426	0.167986	0.199937	0.171259	0.267099	0.440496	0.588789	3.94678	3.21755	2.43168	2.95954	2.30079	1.86221	1.90154	1.4925	1.50583
10	'M'	71	170	60	Left index finger'	69	96	-10	27	4	-44	-45	94	8	-35	cfllppqvjtonbn3bpoug.txt	0.490142	0.827566	0.300878	0.124698	0.0343934	0.045651	0.0366393	0.0136906	0.0101085	0.0123014	0.00621756	0.00471539	0.0264402	0.0378444	0.0479555	0.151628	0.18223	0.189605	0.150238	0.426737	0.538485	0.585631	0.500994	0.662118	4.05093	3.24262	2.6641	3.09177	2.87917	2.05126	1.7234	2.28769	1.47486
13	'M'	49	177	75	Left index finger'	80	94	-6	7	37	-27	1	29	-44	-23	cfpedlivjtonbn3cc4lg.txt	0.516289	0.685605	0.390189	0.186519	0.109805	0.090316	0.0288044	0.0183192	0.0178945	0.010094	0.00674611	0.00505616	0.0217345	0.024207	0.0287023	0.0794941	0.0369523	0.0710287	0.163339	0.0967143	0.0777983	0.114317	0.137071	0.163549	4.13511	3.8029	3.06212	3.08027	2.11065	1.42047	1.84288	1.253	0.914856
0	'M'	68	171	71	Left index finger'	72	92	-8	24	18	-39	-22	13	-19	-30	cgvs1s72had61ag64l40.txt	0.513638	0.799309	0.32375	0.136142	0.0582595	0.0453822	0.0239006	0.0109479	0.00903191	0.00705798	0.00365748	0.00243695	0.0231305	0.0420417	0.0380288	0.100117	0.0722147	0.0915226	0.168971	0.212493	0.191562	0.237926	0.387668	0.344212	4.08285	3.43172	2.64388	2.71709	2.41745	1.92311	1.86338	1.87407	1.42362
15	'M'	65	170	65	Left index finger'	78	97	-3	16	13	-27	-28	35	-27	-26	cfqoe272haddiqs1fk2g.txt	0.533008	0.754307	0.31625	0.163332	0.0598614	0.0554466	0.0268436	0.0119138	0.0110782	0.00572775	0.00380723	0.00285047	0.0123565	0.0164673	0.0276014	0.066821	0.0475427	0.0424268	0.0894209	0.0885111	0.0631477	0.114621	0.134999	0.145146	4.06984	3.56825	2.75447	2.83415	2.49443	1.7734	2.06972	1.81548	1.41498
0	'M'	59	176	85	Left index finger'	67	98	-13	20	29	4	-26	7	21	-12	cbsuenqvjtoqui5t30qg.txt	0.487423	0.765623	0.356713	0.254205	0.102877	0.0737132	0.0587044	0.0337948	0.0161881	0.0104013	0.00769435	0.00455393	0.0415377	0.0536186	0.0471809	0.0479936	0.0733408	0.113972	0.109507	0.123879	0.134351	0.170877	0.265343	0.349671	4.31313	3.81451	3.13352	2.73425	2.76644	2.15939	1.57666	1.37036	1.65556
14	'M'	66	170	70	Left index finger'	49	95	-7	17	10	-27	-25	-21	50	46	cghvlkv2had620d48qtg.txt	0.514002	0.652553	0.327298	0.198715	0.0856745	0.0531408	0.0518903	0.0408153	0.0288417	0.0131643	0.0104725	0.0147953	0.0841479	0.266491	0.194702	0.481084	0.207048	1.17388	0.861324	0.395547	0.841481	0.784022	0.2787	1.25025	4.15912	3.63069	3.139	2.6676	2.80408	2.95325	2.49405	1.99482	1.95777
4	'M'	64	163	66	Left index finger'	60	95	2	10	-21	-32	-3	65	7	-23	chi9opkg0t88crmjimd0.txt	0.573917	0.705565	0.214867	0.0879819	0.069662	0.0632186	0.0276725	0.0163703	0.0180051	0.0103651	0.00364952	0.000537885	0.0139063	0.0187306	0.0482767	0.104479	0.108073	0.0624934	0.191638	0.123638	0.0659352	0.230102	0.855606	0.870282	3.81446	3.41012	2.98225	3.34134	2.65504	2.09519	2.51043	1.9819	1.63613
4	'M'	61	170	170	Left index finger'	74	97	0	13	0	0	-32	-12	58	0	cg3fcmv2had4qgopfmr0.txt	0.552857	0.739008	0.278692	0.184279	0.0686386	0.0380852	0.0411848	0.0279461	0.00811742	0.00632594	0.00695193	0.00423929	0.0411303	0.0595286	0.0595342	0.128552	0.208132	0.217439	0.127487	0.179831	0.353787	0.312663	0.214439	0.391573	4.04501	3.54128	3.16973	2.67971	2.7804	2.17156	1.49842	1.33613	1.65932
22.5	'M'	55	177	66	Left index finger'	92	92	-6	13	35	-62	-5	-8	-28	-29	cgcho6ivjtopa61rss5g.txt	0.53442	0.703876	0.358575	0.104788	0.0486039	0.0304906	0.0143577	0.00666021	0.00367297	0.00279422	0.00160862	0.00118927	0.0620285	0.110668	0.173549	0.30054	0.169343	0.152925	0.251871	0.373317	0.49839	0.73475	0.647266	0.578337	3.85627	3.30138	2.58604	2.62112	2.25738	1.81446	1.58485	2.13105	2.46699
6	'M'	65	162	75	Left index finger'	48	98	-6	18	7	-24	-10	-21	-19	65	chmt82n2had5ptrsf81g.txt	0.530033	0.700804	0.302952	0.14513	0.0674717	0.0432295	0.0311522	0.0270299	0.0231536	0.0139756	0.00828358	0.00549747	0.132176	0.228295	0.25401	0.388158	0.451539	0.309845	0.347527	0.542994	0.523901	0.831235	0.927869	0.938788	3.96058	3.46392	2.89328	2.88162	2.81373	2.7152	2.36806	2.19754	2.34192
8	'M'	64	173	75	Left index finger'	53	94	0	12	-1	-19	2	-29	26	36	cg3f0ssg0t8d04b77d2g.txt	0.550121	0.733147	0.273725	0.147419	0.0848184	0.0400334	0.0330055	0.0302056	0.019801	0.00953728	0.00802957	0.00825145	0.0328465	0.0450063	0.0349867	0.0290061	0.0443013	0.04155	0.0777862	0.044845	0.0746683	0.104662	0.158104	0.117376	4.08625	3.58498	3.2211	2.72362	2.70993	2.8317	2.42877	1.82515	1.62708
33	'M'	70	170	85	Left index finger'	81	87	-12	20	32	-31	-66	71	27	-46	cfs865v2haddiqs1k2o0.txt	0.493249	0.756743	0.357032	0.173837	0.0450237	0.0325235	0.0380813	0.011331	0.00544093	0.00345419	0.00626059	0.0022813	0.0553945	0.140882	0.148705	0.153454	1.51053	0.142743	0.801339	0.303104	1.02569	0.482928	1.38376	0.556148	4.03379	3.48223	2.53403	2.1666	2.69197	1.86535	1.11702	2.13586	2.16537
0	'M'	53	175	71	Left index finger'	79	93	-5	17	14	-39	-47	15	-11	-31	ccaq2ev2hadcsjhiqtk0.txt	0.525572	0.756807	0.318486	0.134516	0.0394956	0.030608	0.017674	0.00796302	0.00380164	0.00284797	0.00201489	0.000986429	0.0136876	0.0156778	0.0424507	0.0380596	0.0410477	0.0732693	0.0557403	0.115637	0.23691	0.163512	0.303001	0.386196	3.95268	3.37166	2.44082	2.44894	2.33117	1.82067	1.54321	1.79475	1.70219
0	'M'	69	175	65	Left index finger'	54	96	-1	16	-5	-37	-32	21	38	-11	cbfkfuavjtoh3rj0eh50.txt	0.543764	0.753079	0.262504	0.113105	0.0427538	0.0346005	0.0322781	0.0188339	0.0110026	0.00959924	0.00792275	0.00468032	0.0155323	0.024246	0.0341166	0.0676356	0.105091	0.0897212	0.0803158	0.209166	0.165381	0.104988	0.186853	0.381102	3.97368	3.38912	2.92609	2.70117	3.01497	2.60422	2.14234	2.16392	2.2897
29.5	'M'	54	168	90	Left index finger'	64	93	-21	26	42	3	1	-13	43	7	cgn1vc4g0t8edo0citng.txt	0.439752	0.790979	0.400328	0.293068	0.158456	0.081661	0.0877442	0.0650134	0.0353743	0.0233072	0.0190215	0.0130601	0.0604245	0.0936681	0.102206	0.134602	0.131681	0.240891	0.159926	0.197848	0.433573	0.294218	0.411487	0.485149	4.46512	3.94548	3.43159	2.79365	2.80449	2.46731	1.68189	1.53766	1.65237
0	'M'	59	182	75	Left index finger'	66	98	-7	23	4	-19	-34	68	28	-37	cg0r812vjtonbn3dg6qg.txt	0.519427	0.785587	0.278426	0.147675	0.0529109	0.0675566	0.0555781	0.0213364	0.0121616	0.0135169	0.00798425	0.00365474	0.0194228	0.0256454	0.0251348	0.0799184	0.0582933	0.0623443	0.0485138	0.211154	0.203821	0.0822154	0.112378	0.142669	4.10175	3.4808	3.08877	3.10002	3.04292	2.1457	1.52909	2.05993	1.49817
23	'M'	60	178	80	Left index finger'	77	95	-20	25	38	35	-52	-40	100	-12	cg1b5okg0t8d04b6ustg.txt	0.444315	0.798676	0.372702	0.367133	0.101353	0.0359198	0.0559896	0.034323	0.0140599	0.00631	0.00611556	0.00425617	0.0314148	0.0440265	0.0559135	0.0393855	0.120253	0.107544	0.0660423	0.095103	0.24324	0.198621	0.178412	0.2559	4.182	3.87401	2.93296	1.76533	1.74087	1.57442	1.44061	3.1097	1.50391
31	'M'	63	175	65	Left index finger'	69	95	-18	16	33	17	-8	-40	12	10	cgchnd2vjtopa61rsrag.txt	0.457708	0.750807	0.366061	0.295309	0.140761	0.0560969	0.0449829	0.0310973	0.0149571	0.0063127	0.00446604	0.00343486	0.0311098	0.0544573	0.045889	0.0708089	0.129432	0.102774	0.0846251	0.130152	0.253466	0.268564	0.201385	0.323151	4.31517	3.91308	3.18019	2.41747	2.33935	2.18562	1.55105	1.02939	1.02449
7	'M'	43	175	95	Left index finger'	82	96	-23	28	51	9	-48	45	13	-43	cgqitff2had7n67r8kgg.txt	0.41508	0.849105	0.425849	0.331706	0.0934926	0.0893747	0.0711711	0.025595	0.00845436	0.00845015	0.00517122	0.00243627	0.0247697	0.0373408	0.034682	0.0692434	0.153804	0.0874456	0.12553	0.311337	0.445547	0.312106	0.341289	0.567715	4.36233	3.76522	2.95523	2.19491	2.15542	1.22478	1.36796	1.21574	0.885806
13	'M'	62	176	60	Left index finger'	65	96	2	11	0	-32	-15	8	1	-11	cg1b6vn2had4qgop5060.txt	0.574663	0.708382	0.269436	0.124079	0.0574572	0.0433278	0.0287496	0.0166196	0.0103759	0.00731473	0.00441512	0.00253261	0.0113942	0.0169293	0.0307949	0.0585726	0.0753821	0.035701	0.0674693	0.0791193	0.104286	0.17429	0.168196	0.173727	3.9254	3.5005	2.92518	2.87341	2.75657	2.39509	2.08385	1.95281	1.78289
1	'M'	70	176	83	Left index finger'	72	99	-3	14	12	-25	-39	35	2	-40	cbfkmuavjtoh3rj0ehvg.txt	0.538903	0.731156	0.308027	0.160483	0.0524211	0.0482524	0.0335194	0.0128922	0.00963395	0.00809894	0.00399476	0.00214752	0.0233821	0.0431413	0.0299886	0.0419688	0.0620057	0.0281191	0.0607584	0.198568	0.10925	0.138479	0.263057	0.342835	4.03212	3.54742	2.76801	2.75305	2.74086	2.02534	1.57588	2.07958	1.58899
32	'M'	47	167	60	Left index finger'	63	98	-19	17	28	16	14	-9	18	26	cb8c24ivjtoh3rj01jt0.txt	0.458157	0.739401	0.342493	0.277863	0.165968	0.104892	0.0844428	0.0699943	0.0430556	0.0231644	0.0164958	0.0128478	0.04864	0.107641	0.068906	0.0774626	0.0770031	0.0727851	0.121178	0.0677821	0.25169	0.230968	0.206908	0.36081	4.43146	4.11201	3.63565	3.07505	2.86864	2.60286	2.09052	1.52938	1.46539
23	'M'	70	170	60	Left index finger'	62	92	-4	24	-8	-51	-48	36	13	-34	cfpegtivjtonbn3cc56g.txt	0.53307	0.801842	0.249164	0.0833188	0.0240809	0.0232164	0.016768	0.00695273	0.00457398	0.00422433	0.00243234	0.00122609	0.0175807	0.0183537	0.0230673	0.0457959	0.0810363	0.0567208	0.0402374	0.134632	0.17082	0.147637	0.246693	0.406471	3.8248	3.05496	2.41931	2.56567	2.82898	2.34813	2.08211	2.5747	2.2904
20	'M'	66	168	70	Left index finger'	70	93	0	17	-13	-47	-34	47	-1	-35	cg8nlg4g0t8d04b7s0l0.txt	0.556431	0.767728	0.23361	0.082304	0.0277722	0.0289795	0.0189351	0.00752589	0.00573149	0.00389722	0.00229222	0.00135413	0.00860651	0.0148016	0.0264634	0.0522385	0.0756766	0.0527466	0.117799	0.181749	0.163772	0.200531	0.379644	0.436403	3.77484	3.14668	2.60836	2.87358	2.85029	2.25346	2.04478	2.17104	1.99311
7	'M'	70	170	82	Left index finger'	59	93	-4	20	3	-12	-10	-24	32	8	cgptjin2had7n67qvc2g.txt	0.531621	0.780698	0.288573	0.177574	0.0862654	0.0456985	0.0394797	0.0278835	0.0140673	0.00934441	0.00776769	0.0049639	0.0204467	0.0280379	0.0348697	0.0353373	0.045935	0.073023	0.08322	0.0647989	0.0833013	0.0973167	0.176419	0.17666	4.15186	3.63851	3.20539	2.66126	2.65745	2.44618	1.95826	1.6384	1.69046
10	'M'	70	167	68	Left index finger'	60	95	-4	16	14	-24	-22	20	16	-28	cgijdu72had620d4gm40.txt	0.525075	0.759814	0.331581	0.173574	0.0746677	0.0641767	0.0478363	0.0210069	0.0130066	0.0135658	0.00878696	0.00540613	0.0257362	0.0318346	0.0348956	0.0593764	0.0594644	0.0781896	0.0688133	0.150743	0.095041	0.0529295	0.139051	0.125703	4.20024	3.715	3.05332	2.81915	2.78619	2.24849	1.87306	2.15663	1.85477
26	'M'	56	170	80	Left index finger'	65	96	-3	15	5	-17	-32	-5	38	-7	cg1b9jcg0t8d04b6utv0.txt	0.542425	0.738778	0.285391	0.168175	0.0634982	0.0378965	0.0350036	0.0215307	0.0102157	0.00614373	0.00465554	0.00334205	0.0283853	0.0560891	0.0587235	0.0880225	0.195324	0.145995	0.151117	0.263796	0.378739	0.449498	0.55739	0.55116	4.01679	3.56356	2.88146	2.41891	2.69772	2.26105	1.70481	1.45922	1.72851
0	'M'	46	173	81	Left index finger'	61	90	1	10	-12	-18	-31	35	26	-25	cc3cvgcg0t8e9qh4vb5g.txt	0.566321	0.715247	0.243436	0.138324	0.0495263	0.0480991	0.0362564	0.0161769	0.00799967	0.00847122	0.00527336	0.00240633	0.0315632	0.0304211	0.0450457	0.0523304	0.0910177	0.0666776	0.0687294	0.206033	0.173199	0.161073	0.221501	0.344289	3.93083	3.43248	2.93369	2.88536	3.04949	2.3362	1.72602	2.3505	2.02025
17	'M'	58	175	75	Left index finger'	76	96	-9	20	15	-47	-49	100	-14	-46	cfpe7i2vjtonbn3cc3d0.txt	0.500863	0.777146	0.316512	0.115439	0.0300089	0.0526407	0.0295088	0.0101247	0.0114465	0.00624073	0.0030987	0.0020588	0.0120928	0.0191297	0.0210697	0.0532357	0.163254	0.0615539	0.103766	0.176053	0.121917	0.130112	0.174752	0.37381	4.00016	3.31375	2.37643	3.20343	2.85311	1.96558	2.0465	1.98431	1.46781
17	'M'	67	170	75	Left index finger'	68	98	-21	34	57	-16	-10	-14	46	9	cfusi52vjtonbn3d6eeg.txt	0.442197	0.861016	0.42623	0.252472	0.124901	0.0710097	0.0661061	0.0484309	0.026114	0.0170544	0.014407	0.0100967	0.11055	0.135143	0.0896119	0.143317	0.227283	0.223595	0.126904	0.2677	0.326346	0.299185	0.223098	0.351661	4.48118	3.85669	3.21671	2.76397	2.789	2.55624	1.88463	1.55384	1.65252
3	'M'	68	173	70	Left index finger'	92	94	-3	20	14	-55	28	-18	-53	30	cfu9n8ivjtonbn3d411g.txt	0.540895	0.776098	0.30975	0.09195	0.0697837	0.0347566	0.0103302	0.00998276	0.00432119	0.00244647	0.00194578	0.00109139	0.0114818	0.0154298	0.0297725	0.100986	0.0372794	0.215682	0.196579	0.0818997	0.380594	0.326495	0.30319	0.419447	3.97898	3.24876	2.72769	2.70856	1.88276	1.79354	1.77915	1.04611	1.58594
18	'M'	60	175	86	Left index finger'	74	97	1	11	-2	-45	15	19	-25	-6	cfpe2e2vjtonbn3cc1lg.txt	0.568604	0.716449	0.264978	0.104525	0.0631593	0.0536244	0.0267377	0.0158036	0.0109877	0.0071005	0.00440219	0.00261225	0.00788886	0.0172706	0.0396725	0.06342	0.0368975	0.0287182	0.0476779	0.0639328	0.069391	0.10231	0.12518	0.235152	3.91115	3.4504	2.85989	3.12727	2.64148	2.15796	2.10284	1.93065	1.65091
16	'M'	67	173	75	Left index finger'	68	97	-10	25	14	-28	-28	1	48	-7	cgqikbf2had7n67r8el0.txt	0.488523	0.820873	0.322742	0.157177	0.0577909	0.0443902	0.0404676	0.0229197	0.00842007	0.0062308	0.00525263	0.00323814	0.0241446	0.0460485	0.0653511	0.0941578	0.238362	0.139916	0.103349	0.330447	0.507644	0.231831	0.450373	0.496406	4.15897	3.43899	2.88416	2.39159	2.90831	2.34503	1.54081	1.32615	1.73582
0	'M'	67	173	75	Left index finger'	68	96	-9	22	17	-24	-30	-7	14	-13	cgptlrv2had7n67qvdcg.txt	0.516171	0.776753	0.309023	0.165952	0.0623147	0.0408447	0.0308168	0.0167956	0.00771589	0.00591576	0.00485144	0.00326613	0.0375523	0.0715496	0.0575533	0.099805	0.112541	0.113543	0.0820678	0.130376	0.235478	0.202264	0.189119	0.401193	4.0866	3.49541	2.83903	2.46077	2.66132	2.21531	1.73295	1.49418	1.71461
21	'M'	50	180	100	Left index finger'	78	97	-12	17	47	-33	-30	13	-19	-26	cbaaqjv2hadbnne30ffg.txt	0.487651	0.76117	0.401703	0.194206	0.071104	0.0571018	0.0310685	0.0148411	0.00860678	0.00495401	0.00338047	0.00200489	0.0144142	0.0334446	0.0333662	0.0701911	0.0875422	0.0879895	0.107856	0.145071	0.19418	0.214864	0.30979	0.356938	4.18335	3.62151	2.69318	2.60714	2.26314	1.645	1.43008	1.38901	1.1797
2	'M'	45	180	86	Left index finger'	80	94	-21	17	55	-9	-4	0	-12	-29	chcb05f2hadcimregabg.txt	0.432417	0.723168	0.459796	0.269028	0.153557	0.0952227	0.0588499	0.0215271	0.0229792	0.014479	0.0132952	0.00621365	0.114185	0.25146	0.0871297	0.238165	0.310302	0.258832	0.767139	0.42181	1.00509	0.497383	1.07653	0.628743	4.32123	3.8481	3.06255	2.68702	2.07738	1.31001	1.12512	1.35159	2.33996
17	'M'	50	175	80	Left index finger'	63	92	-2	14	10	-6	-15	41	7	-29	cfms90ivjtonbn3c03o0.txt	0.55554	0.727778	0.299154	0.187991	0.0874611	0.0838261	0.0566404	0.0257425	0.0164509	0.012703	0.00761062	0.0043849	0.0225895	0.0220715	0.030666	0.0911003	0.0720751	0.0569874	0.148175	0.206475	0.10558	0.156965	0.219571	0.385035	4.15418	3.80096	3.16713	3.08222	2.80705	2.12788	1.74913	1.7887	1.45211
20	'M'	56	183	75	Left index finger'	71	96	-7	11	37	-55	-4	-6	-34	-8	cgiiarkg0t8edo0bb750.txt	0.517816	0.711987	0.377963	0.119468	0.0586217	0.0400141	0.0172254	0.0102772	0.00648859	0.00352777	0.00176636	0.00141741	0.0148781	0.0284094	0.0229098	0.102566	0.0737037	0.08436	0.109274	0.109814	0.149338	0.208854	0.45367	0.360519	4.05127	3.38027	2.49155	2.82678	2.29545	2.01193	2.05656	1.98526	1.98203
17	'M'	61	175	85	Left index finger'	63	93	-3	7	13	-20	-30	-12	33	3	chgvkv72had9fa0ip3q0.txt	0.537075	0.709117	0.305871	0.171892	0.0661829	0.0398654	0.0356889	0.0235982	0.014509	0.0101733	0.00738142	0.00533777	0.0652336	0.0892195	0.165335	0.195298	0.21009	0.27515	0.219595	0.236761	0.250853	0.244376	0.280092	0.265643	4.05933	3.67929	3.00308	2.58265	2.92626	2.63568	2.22249	2.02508	1.82183
10	'M'	64	165	64	Left index finger'	65	92	-5	13	21	-17	-14	30	22	-12	ch5269n2had61ag8b4n0.txt	0.54083	0.726173	0.31656	0.179111	0.0860687	0.0748846	0.0610939	0.0360129	0.0215289	0.0171916	0.0133383	0.00952502	0.0386472	0.07521	0.125368	0.0724156	0.103681	0.0846486	0.0589663	0.126174	0.0688242	0.0950507	0.115658	0.0898907	4.20272	3.82485	3.26909	3.08918	3.07493	2.56217	2.0366	2.04109	1.97992
21.5	'M'	55	173	100	Left index finger'	76	96	-11	4	37	-5	-7	-8	-7	-9	cb8b81cg0t87cj2nogog.txt	0.502865	0.654624	0.367326	0.228237	0.141494	0.0741706	0.0464572	0.0228752	0.0125751	0.00856499	0.0092196	0.00543881	0.0929718	0.173023	0.137883	0.173399	0.171685	0.209721	0.295411	0.384586	0.493841	0.473947	0.494569	0.485824	4.19546	3.81667	3.17894	2.53866	2.50677	1.94725	1.93656	1.77669	1.84991
13	'M'	48	170	71	Left index finger'	80	96	-9	25	13	-30	-41	12	14	-27	cg8nqekg0t8d04b7s2c0.txt	0.509834	0.786083	0.308965	0.143308	0.0455175	0.039742	0.0327266	0.0136293	0.00738692	0.00486497	0.00342599	0.00238207	0.0354959	0.0848315	0.0876409	0.120339	0.591524	0.694327	1.81761	1.35364	1.32466	1.29259	1.24173	1.31566	3.99653	3.3338	2.47022	2.39467	2.38612	1.68751	1.46762	2.30373	2.89336
19	'M'	53	178	82	Left index finger'	100	94	-8	18	34	-48	-24	-15	-32	-37	cgn1snkg0t8edo0ciskg.txt	0.510856	0.758778	0.36746	0.131189	0.0521984	0.0300121	0.0133421	0.00504523	0.00179427	0.00108052	0.00114898	0.00134332	0.0180311	0.0242703	0.0240859	0.0437679	0.0350863	0.0523066	0.110333	0.19435	0.386542	0.61985	0.569145	0.359633	3.99151	3.26628	2.46866	2.22406	1.82136	1.26461	0.849752	1.26996	3.81818
18	'M'	68	176	75	Left index finger'	61	99	-1	13	7	-13	-2	0	25	-1	cg7d8p4g0t8d04b7mt50.txt	0.549474	0.733813	0.2921	0.170577	0.0880016	0.0630344	0.0529369	0.0329305	0.0176086	0.0129044	0.00946491	0.00655356	0.0153756	0.0315843	0.0304217	0.0598595	0.0996924	0.0552428	0.0509383	0.112498	0.157665	0.12091	0.135101	0.18022	4.15531	3.68135	3.26481	2.89961	2.89283	2.42219	1.93472	1.76192	1.72043
19	'M'	70	165	63	Left index finger'	53	93	-8	19	9	5	12	-28	-11	37	cghvchkg0t8edo0b5j1g.txt	0.511605	0.773664	0.299935	0.206489	0.117788	0.0595138	0.0378867	0.0323017	0.0227948	0.012409	0.00653316	0.00558361	0.0696986	0.114071	0.226545	0.230317	0.317686	0.297571	0.325045	0.344147	0.405391	0.459297	0.357012	0.364515	4.2038	3.76753	3.26856	2.57387	2.57407	2.53984	2.25265	1.66585	1.24225
16	'M'	58	170	75	Left index finger'	60	99	1	13	-8	-21	-23	-12	44	0	cgj8tikg0t8edo0biqag.txt	0.558904	0.735857	0.253161	0.140349	0.0571853	0.03603	0.0345769	0.0222677	0.0109322	0.00684299	0.00547011	0.00359807	0.0319635	0.0481548	0.0482734	0.0502318	0.106075	0.0880952	0.073397	0.0973309	0.160877	0.142281	0.150127	0.166888	3.9768	3.45998	3.00177	2.55105	2.90048	2.57271	2.05248	1.77781	1.93231
2	'M'	57	170	71	Left index finger'	62	95	-2	14	3	-19	-25	21	21	-16	cgvrl7kg0t889ug8sa5g.txt	0.544109	0.742165	0.28303	0.159366	0.0638503	0.0516723	0.0420475	0.0231976	0.0123282	0.00996321	0.00694634	0.00389884	0.0332786	0.0439564	0.0456297	0.0385332	0.0581529	0.0910142	0.0623877	0.0968605	0.110057	0.137531	0.160088	0.184046	4.06924	3.59726	3.00389	2.80226	2.90967	2.36087	1.83941	1.88207	1.80377
0	'M'	55	170	95	Left index finger'	63	97	-12	24	21	-9	-38	-42	66	-5	cg06hs2vjtonbn3dcpbg.txt	0.490938	0.780109	0.340592	0.215011	0.0688954	0.0284185	0.030974	0.0185416	0.00732294	0.00351393	0.00183106	0.00149683	0.0471494	0.0827529	0.070966	0.123683	0.147502	0.221258	0.160075	0.166109	0.33248	0.432869	0.635536	0.551597	4.11862	3.52513	2.81505	1.98684	2.41451	1.9602	1.22846	0.69561	1.17226
0	'M'	70	172	64	Left index finger'	68	92	-7	25	0	-47	-10	60	-21	-28	cbkrv32vjtoh3rj0sgeg.txt	0.515489	0.806749	0.275929	0.0988944	0.0481579	0.0537901	0.0276307	0.0127539	0.0134821	0.00729762	0.00435252	0.00386173	0.013338	0.0180561	0.0293332	0.0449917	0.0497919	0.0287123	0.0800339	0.0861645	0.0563917	0.130758	0.156149	0.159035	4.02175	3.34004	2.68941	3.23998	2.72568	2.049	2.20595	2.0259	1.64888
20	'M'	68	176	80	Left index finger'	68	97	-9	15	24	-9	-23	4	23	-13	cgvrbekg0t889ug8s94g.txt	0.516994	0.731969	0.327841	0.205721	0.0847567	0.0616342	0.0497633	0.027398	0.0192808	0.0181337	0.0132304	0.00900762	0.0217118	0.0301305	0.0307665	0.0438075	0.0302454	0.0331991	0.0440076	0.0780087	0.0489651	0.038917	0.0465645	0.0879066	4.25173	3.76485	3.13141	2.89947	2.92684	2.50264	2.16901	2.20384	1.87402
2	'M'	61	175	72	Left index finger'	66	94	3	10	-8	-23	-35	9	23	-27	chhjlb72had9fa0ivg10.txt	0.573626	0.714853	0.254275	0.134681	0.0467054	0.0357858	0.0291113	0.013413	0.00608643	0.00628695	0.00410917	0.0022089	0.0170726	0.0145877	0.0261973	0.0223489	0.047893	0.0751464	0.0513158	0.0655301	0.167442	0.157332	0.130751	0.240379	3.87409	3.45191	2.86551	2.64217	2.84421	2.26459	1.7309	2.14683	2.01339
3	'M'	44	178	78	Left index finger'	62	95	-2	9	14	-26	-32	9	13	-26	cg2m294g0t8d04b7460g.txt	0.542061	0.700483	0.313385	0.16053	0.0599579	0.0440318	0.0328711	0.016396	0.00964406	0.00797626	0.00648675	0.00416919	0.0261002	0.0378509	0.0384486	0.0529661	0.101422	0.128334	0.100342	0.15379	0.258992	0.255554	0.219158	0.304241	4.0331	3.61218	2.84191	2.57251	2.76587	2.39201	2.04375	2.02827	1.93485
14	'M'	55	170	84	Left index finger'	72	91	-7	14	26	-24	-15	0	21	8	cg81gbv2had4qgoq6nvg.txt	0.523025	0.721466	0.33837	0.177389	0.0825329	0.0560496	0.0453651	0.0316895	0.0226443	0.0176963	0.0136694	0.00991017	0.0195079	0.0236523	0.0276378	0.0374819	0.0577419	0.0357268	0.0333683	0.0861473	0.0979274	0.0772666	0.118027	0.138869	4.22349	3.76219	3.15898	2.91091	2.88625	2.59286	2.29742	2.08539	1.88861
3	'M'	65	162	60	Left index finger'	74	99	3	13	-24	-44	-21	80	-33	-41	cgpuelf2had7n67qvrmg.txt	0.579016	0.726648	0.206422	0.078796	0.031381	0.0410666	0.0177651	0.00610861	0.0083264	0.00447658	0.00130216	0.00200778	0.014198	0.02204	0.037968	0.0692257	0.084619	0.0667247	0.147952	0.252826	0.155401	0.27295	0.530731	0.356329	3.66286	3.15681	2.66852	3.29753	2.8556	2.03845	2.66963	2.53997	1.92609
0	'M'	69	170	70	Left index finger'	79	94	-1	6	26	-40	-48	78	-19	-22	cca1cr72hadcsjhio7rg.txt	0.541698	0.690466	0.348726	0.137636	0.0390179	0.0468389	0.0237568	0.0122605	0.0103658	0.0060367	0.00427065	0.00286616	0.0341664	0.0422235	0.0728929	0.113767	0.134779	0.130204	0.208326	0.224857	0.200625	0.184528	0.257772	0.337239	3.9314	3.59736	2.51628	3.18309	2.70698	1.9293	2.00732	1.7599	1.47176
8	'M'	49	188	88	Left index finger'	74	94	-10	12	30	3	-27	16	29	-26	cfvgm6avjtonbn3d974g.txt	0.494196	0.720161	0.356346	0.260958	0.104587	0.0800161	0.0700992	0.034709	0.0143837	0.012743	0.00962966	0.00497783	0.0238071	0.0206952	0.0391921	0.0367778	0.0680681	0.0858672	0.0522386	0.0946332	0.0982652	0.0988658	0.121151	0.187207	4.2829	3.93387	3.22209	2.76037	2.80712	2.10243	1.48651	1.32621	1.30683
0	'M'	74	166	70	Left index finger'	52	98	0	9	-1	-27	-8	-3	19	12	cbtfhkivjtoqui5t4uug.txt	0.573814	0.65317	0.286192	0.141124	0.0782061	0.0475181	0.0359362	0.0278185	0.0191713	0.0119841	0.0080139	0.00547335	0.122669	0.268237	0.163812	0.28613	0.258586	0.266979	0.359528	0.403881	0.52092	0.602596	0.578916	0.786289	3.96114	3.57066	3.19122	2.94741	2.83824	2.69028	2.36043	2.42704	2.09113
7	'M'	62	170	68	Left index finger'	80	95	-3	19	-4	-52	-13	10	-50	1	cgvruun2had61ag64jug.txt	0.539679	0.773728	0.261588	0.086968	0.0398641	0.0302393	0.0102291	0.00599404	0.00450703	0.00182629	0.00112626	0.00113117	0.00730808	0.0132191	0.0197037	0.0590636	0.0413547	0.0654925	0.12591	0.210725	0.190495	0.393633	0.520169	0.403118	3.81269	3.1008	2.415	2.9597	2.32411	1.66999	2.47085	1.90679	1.64248
17	'M'	60	170	80	Left index finger'	63	96	-9	18	21	-8	-22	-25	56	3	cghvjf4g0t8edo0b5n60.txt	0.503036	0.75798	0.330532	0.207785	0.0873422	0.0405866	0.0433186	0.029732	0.0139189	0.0121273	0.011484	0.00797593	0.0201502	0.0278554	0.0253652	0.0137324	0.0233673	0.0392382	0.0417552	0.0313587	0.075847	0.0796924	0.0591172	0.0890143	4.23414	3.76667	3.10448	2.5351	2.85356	2.62235	2.00953	1.83283	2.16183
6	'M'	46	175	78	Left index finger'	79	94	-28	17	72	13	-18	-20	8	-4	chi9risg0t88crmjin80.txt	0.398398	0.765962	0.465703	0.380584	0.167582	0.0909448	0.0653145	0.0405072	0.0219106	0.0103241	0.00855111	0.00586208	0.0314959	0.0361751	0.0894772	0.0650139	0.110617	0.103516	0.122187	0.188662	0.326964	0.283584	0.265334	0.376044	4.41112	4.18854	3.12906	2.50236	2.31206	1.76956	1.18518	0.905849	1.03835
0	'M'	48	165	62	Left index finger'	65	96	1	11	-2	-32	-24	16	23	-10	cghvdqf2had620d48l70.txt	0.558688	0.726991	0.266995	0.119524	0.0413035	0.0347056	0.0281046	0.0143543	0.00836722	0.00723092	0.00490923	0.00267412	0.0222889	0.0255321	0.0379808	0.0824886	0.128255	0.108194	0.0883671	0.159976	0.156599	0.20577	0.227371	0.44981	3.89281	3.40684	2.79442	2.74216	2.86893	2.41312	2.0205	2.14716	1.96381
11	'M'	64	172	70	Left index finger'	70	95	0	14	0	-22	-16	-2	19	0	cfqnt2ivjtonbn3ci2q0.txt	0.564482	0.722794	0.275395	0.147089	0.0676035	0.0446554	0.0341093	0.0227592	0.0153896	0.0115091	0.00862892	0.00654319	0.0322068	0.0427274	0.0526835	0.0555533	0.0850972	0.0817032	0.088155	0.138492	0.163955	0.195664	0.228081	0.277094	4.02832	3.64917	3.11981	2.80522	2.83412	2.56259	2.27297	2.10517	1.96663
3	'M'	72	168	67	Left index finger'	67	94	-6	19	24	-37	-20	19	-6	-24	cg7dldcg0t8d04b7n0fg.txt	0.514175	0.781648	0.347384	0.15083	0.0648387	0.0547772	0.0337328	0.0162259	0.0121556	0.00782692	0.00429295	0.00234317	0.0142029	0.0211491	0.0297344	0.054313	0.0507664	0.0396687	0.093371	0.0861508	0.0579284	0.103546	0.162468	0.172331	4.12217	3.571	2.78668	2.7436	2.48605	1.90287	1.779	1.63534	1.2252
3	'M'	60	172	83	Left index finger'	65	95	5	6	-5	-20	-6	-8	25	8	cgvs37f2had61ag64log.txt	0.591176	0.69404	0.242021	0.122551	0.0592791	0.0358691	0.0321834	0.0230717	0.0146332	0.010654	0.00882113	0.00670648	0.0374489	0.0361949	0.0449244	0.0218565	0.0403746	0.0498558	0.0403923	0.069983	0.105972	0.0896062	0.0937387	0.117216	3.92201	3.48965	3.18264	2.86509	2.99234	2.832	2.46927	2.25395	2.20968
3	'M'	77	182	86	Left index finger'	56	95	-10	22	16	-25	-32	-2	34	-5	cg0r4tivjtonbn3dg5rg.txt	0.498527	0.786926	0.315952	0.159965	0.0556222	0.0400646	0.0352383	0.0206764	0.0112023	0.00956427	0.00775448	0.00572058	0.0117909	0.017372	0.0168927	0.0189643	0.0425641	0.0571981	0.0346229	0.0696516	0.0688333	0.0535429	0.051068	0.0540118	4.16853	3.44515	2.85986	2.61909	3.00977	2.49213	2.02167	2.1673	2.09771
9.5	'M'	42	173	85	Left index finger'	88	97	-7	13	45	-51	28	-7	-50	-3	cgpumjv2had7n67r00u0.txt	0.514252	0.729197	0.402794	0.132157	0.0943828	0.0603671	0.0195326	0.0128638	0.00767252	0.00277296	0.00149372	0.00100612	0.017771	0.0257268	0.0197398	0.0455188	0.0353263	0.0430446	0.0816028	0.067695	0.132282	0.234817	0.308393	0.322465	4.11361	3.50192	2.73548	2.72079	1.87005	1.53302	1.69545	1.19766	1.16909
13	'M'	59	175	75	Left index finger'	85	97	-12	36	18	-53	-17	31	-41	-33	cgqi5qn2had7n67r86i0.txt	0.483317	0.881666	0.328208	0.103943	0.0478181	0.0441158	0.0164125	0.00726365	0.00799236	0.00308483	0.00143331	0.00178643	0.0144344	0.0227697	0.0278169	0.0937531	0.0901591	0.0623462	0.150587	0.243814	0.146032	0.352267	0.471342	0.310259	4.06153	3.16217	2.37623	2.87802	2.06549	1.12986	2.09099	1.46213	0.656494
7	'M'	75	170	73	Left index finger'	73	90	-20	16	71	-20	-31	-12	-8	-23	ch522a4g0t889ug9ads0.txt	0.459972	0.754005	0.433982	0.270504	0.103607	0.0627223	0.0407179	0.021052	0.0116891	0.00817385	0.00571153	0.00430415	0.0588435	0.0939764	0.122384	0.133531	0.293203	0.155005	0.220803	0.367376	0.274239	0.492558	0.438955	0.500994	4.13236	3.84895	2.65937	2.17384	1.88447	1.2479	0.831824	2.42354	3.69314
15	'M'	66	179	90	Left index finger'	59	96	-3	15	1	-35	-29	-7	57	-5	cghvmpsg0t8edo0b5p80.txt	0.536777	0.754958	0.273574	0.121013	0.0443319	0.0316177	0.0315417	0.018311	0.00839242	0.00714309	0.00657461	0.00421495	0.0201202	0.0352282	0.0514571	0.100223	0.1871	0.138191	0.134995	0.258838	0.358734	0.275463	0.219451	0.477144	3.96795	3.38541	2.85175	2.45062	2.99554	2.60077	2.02377	1.71124	2.02351
0	'M'	65	165	80	Left index finger'	76	97	-9	28	11	-39	-25	48	-28	-40	cg8nrev2had4qgoqae80.txt	0.502776	0.835847	0.309082	0.133677	0.0510289	0.0525906	0.0262859	0.00925569	0.00869789	0.00573576	0.00276565	0.00201756	0.0257679	0.0436041	0.0467241	0.110535	0.0863193	0.0941106	0.205218	0.213488	0.182564	0.239785	0.372198	0.283335	4.06953	3.37207	2.64303	2.84374	2.48866	1.68635	1.83021	1.87028	1.38311
7	'M'	58	172	91	Left index finger'	61	95	-9	18	16	6	-3	-32	16	33	cfusadn2haddiqs1qm20.txt	0.507182	0.749693	0.314283	0.236329	0.133395	0.0611572	0.0443494	0.0392533	0.0266979	0.0134099	0.00803034	0.00642367	0.0226016	0.0282968	0.0365858	0.0292865	0.0766905	0.0728302	0.0583496	0.0489218	0.094608	0.114201	0.129559	0.110623	4.2681	3.8967	3.40083	2.76427	2.54782	2.57698	2.12676	1.52883	1.18951
0	'M'	73	176	80	Left index finger'	67	96	-10	27	17	-24	-25	-32	34	9	chcarnv2hadcimreg7jg.txt	0.495086	0.818239	0.322486	0.167891	0.0689788	0.0335681	0.0296206	0.0210097	0.0116738	0.00669586	0.00513653	0.00380682	0.0230228	0.028925	0.0334911	0.0326606	0.06482	0.0740229	0.0555845	0.0596237	0.0677133	0.0781462	0.101571	0.169873	4.15241	3.47777	2.89491	2.41578	2.54011	2.32381	1.81782	1.49035	1.44526
10	'M'	41	180	100	Left index finger'	82	95	-6	11	38	-31	-47	40	-6	-43	chgvkef2had9fa0ip3gg.txt	0.524275	0.718464	0.373653	0.17592	0.0465937	0.0459299	0.0286858	0.0103328	0.00680512	0.00616587	0.00407559	0.00267777	0.0128792	0.0349406	0.0297721	0.0628402	0.0829273	0.0577549	0.0799722	0.171379	0.116712	0.138717	0.124181	0.173796	4.0288	3.65462	2.65342	2.69449	2.33768	1.63089	1.28599	1.62805	1.2932
15	'M'	78	170	74	Left index finger'	60	95	-4	17	-5	-37	-34	16	75	-4	cg06dnqvjtonbn3dco10.txt	0.533854	0.764616	0.259939	0.115085	0.0406335	0.0320916	0.0373653	0.0230187	0.00800581	0.00650826	0.00683194	0.00387394	0.0331065	0.0457679	0.0538192	0.0529457	0.0750271	0.0706413	0.0555884	0.0905801	0.200462	0.195057	0.213016	0.25801	3.94847	3.29916	2.86491	2.51551	3.31252	2.67114	1.86213	1.41181	2.04766
7	'M'	65	170	75	Left index finger'	94	96	-3	8	29	-43	-26	51	-24	-8	cfllfnivjtonbn3bplp0.txt	0.533042	0.699914	0.363573	0.139772	0.0509188	0.0513817	0.0241943	0.0163719	0.0118824	0.00876265	0.00626802	0.00418148	0.0588625	0.0907517	0.100548	0.172413	0.376927	0.237441	0.348369	1.30901	0.433642	1.03333	0.907887	0.622017	4.0411	3.51448	2.73112	2.7101	2.42931	2.14946	2.00673	1.82857	1.58082
10	'M'	58	174	73	Left index finger'	66	97	-1	15	7	-22	-22	16	0	-27	cghvo5n2had620d48t20.txt	0.548827	0.743186	0.293678	0.161043	0.0677773	0.0533056	0.0365356	0.0174985	0.00987987	0.00706212	0.00453437	0.0027097	0.0055248	0.0104432	0.0143395	0.0347301	0.0363196	0.0351445	0.064287	0.12199	0.161243	0.130467	0.181029	0.262046	4.06763	3.62292	2.97256	2.76774	2.64651	2.13797	1.76638	1.88416	1.7115
14	'M'	65	179	77	Left index finger'	69	96	-7	20	11	0	-16	-28	41	13	cfllhb2vjtonbn3bpmgg.txt	0.512291	0.7875	0.306773	0.211919	0.0942559	0.0465999	0.0426863	0.0318311	0.0160328	0.00796063	0.00656971	0.0049275	0.023993	0.0381028	0.0318114	0.0610573	0.120595	0.0433307	0.0642308	0.126797	0.185978	0.0946133	0.180668	0.218476	4.20713	3.68511	3.18678	2.63175	2.69537	2.38808	1.73921	1.31129	1.29775
16	'M'	67	170	80	Left index finger'	65	95	-3	17	5	-18	-23	3	26	-12	cg3fdccg0t8d04b77fpg.txt	0.53261	0.763279	0.295973	0.164954	0.0679317	0.0465769	0.0389053	0.0219964	0.0118159	0.0102474	0.00685106	0.00433384	0.0161593	0.022127	0.0188591	0.0421395	0.0402433	0.0516394	0.0360081	0.0818211	0.0832204	0.107357	0.103424	0.11021	4.10873	3.6208	3.01046	2.72513	2.81897	2.34442	1.85219	1.92174	1.83925
13	'M'	68	165	65	Left index finger'	65	97	-1	14	-3	-31	-29	26	18	-22	cg3evl4g0t8d04b77cg0.txt	0.542992	0.739476	0.267909	0.121856	0.045373	0.0402763	0.0319632	0.015917	0.00655657	0.00688331	0.00586702	0.00343718	0.0130908	0.0176826	0.0259764	0.0369841	0.100823	0.088219	0.0535098	0.14971	0.205394	0.114956	0.125082	0.202127	3.95884	3.36381	2.86865	2.577	3.01008	2.45134	1.80788	1.86854	2.14294
15	'M'	65	170	70	Left index finger'	57	95	6	5	-10	-11	1	4	28	5	cg069mivjtonbn3dcmt0.txt	0.582479	0.691414	0.243528	0.14668	0.0797155	0.0599174	0.0507963	0.0341245	0.0184213	0.0156421	0.0142596	0.00957726	0.0209445	0.0332607	0.0334243	0.0374274	0.0556095	0.0436337	0.034037	0.0604762	0.0847808	0.0600606	0.0546765	0.101111	4.0603	3.64906	3.33211	3.08288	3.06078	2.7402	2.26406	2.06502	2.17099
4	'M'	58	173	81	Left index finger'	58	95	-6	20	0	-27	-31	9	49	-10	cge0h3cg0t8edo09po7g.txt	0.513913	0.79611	0.280103	0.136512	0.0497344	0.0376121	0.0382369	0.0233291	0.00767271	0.00484156	0.00543037	0.00336371	0.0258916	0.0416441	0.0665714	0.048138	0.0981598	0.109507	0.0850782	0.0823627	0.268922	0.256262	0.198238	0.303197	4.02113	3.39411	2.84543	2.41009	2.99857	2.44398	1.62858	1.06627	2.03804
15	'M'	49	170	86	Left index finger'	72	98	-8	22	19	-20	-20	24	24	-16	cbtf0lavjtoqui5t4r90.txt	0.516881	0.776559	0.319045	0.183414	0.0801181	0.0652897	0.0539479	0.0302205	0.01341	0.0107972	0.00866263	0.00538205	0.0273737	0.0381827	0.034962	0.0703816	0.16539	0.0491936	0.0541795	0.162998	0.181626	0.0825325	0.0968408	0.227375	4.20811	3.61552	3.10073	2.81603	2.88556	2.23868	1.57207	1.54697	1.62261
13	'M'	51	173	90	Left index finger'	75	96	-12	16	29	18	-40	-21	38	-8	cfqo9uqvjtonbn3ci6sg.txt	0.489912	0.694816	0.366694	0.298527	0.0938042	0.0512859	0.0463819	0.0262324	0.0135026	0.00906843	0.00591954	0.00373677	0.080621	0.199809	0.160978	0.118283	0.10669	0.152053	0.140755	0.164575	0.226785	0.224359	0.304191	0.380944	4.19533	3.98568	2.96661	2.35885	2.68876	2.05636	1.46974	1.41217	1.03327
7	'M'	58	175	70	Left index finger'	72	92	0	15	9	-40	2	0	-12	-11	cfg9hjivjtonbn3ah650.txt	0.554228	0.736815	0.295665	0.119784	0.0659287	0.0449737	0.0260692	0.0152453	0.0112268	0.00856861	0.00647015	0.00538057	0.0112604	0.0183099	0.0172689	0.0424796	0.0402017	0.0530322	0.0591932	0.0533564	0.0511538	0.0599327	0.0826977	0.247942	4.02019	3.49492	2.96173	2.89523	2.57893	2.23857	2.11904	2.05167	1.82604
3	'M'	53	160	65	Left index finger'	90	96	-2	19	1	-46	-30	18	-34	-27	chgvc3kg0t88crmjau50.txt	0.533839	0.809197	0.27885	0.118255	0.0393324	0.0348451	0.0155747	0.00628211	0.00519607	0.00312427	0.00172404	0.00158913	0.0780219	0.16103	0.173162	0.274617	0.228565	0.198442	0.30433	0.331198	0.389743	0.652397	0.736371	0.475133	3.87003	3.233	2.54417	2.67232	2.22505	1.59405	1.76414	1.44437	2.37506
14	'M'	68	170	45	Left index finger'	59	91	-14	26	26	-33	-2	-41	58	33	chlhm7v2had5ptrs5k00.txt	0.483371	0.802446	0.350779	0.16812	0.0914354	0.0340025	0.036022	0.0308659	0.0199697	0.00797076	0.00638884	0.00585535	0.0345225	0.0593953	0.0681595	0.0720357	0.0891185	0.175783	0.151803	0.150186	0.109592	0.282058	0.414144	0.37509	4.23545	3.56876	2.97871	2.56981	2.51576	2.7475	2.04265	1.38715	1.11113
2	'M'	66	170	60	Left index finger'	69	98	-12	29	20	-43	-23	8	-10	-13	cgglfrcg0t8edo0ambo0.txt	0.522751	0.810818	0.302317	0.128088	0.0651384	0.0419389	0.0212117	0.0121437	0.00860785	0.00472117	0.00335558	0.0029128	0.144528	0.198993	0.0807213	0.251302	0.380955	0.226503	0.142998	0.257464	0.319653	0.365146	0.410764	0.321586	4.06824	3.2718	2.59294	2.71696	2.36036	1.88404	1.89934	1.65301	1.41802
15	'M'	49	173	81	Left index finger'	82	93	-20	24	71	-35	-11	20	-25	-17	cg3f73cg0t8d04b77e80.txt	0.472061	0.805617	0.431722	0.177737	0.0805977	0.0649238	0.0311352	0.0146493	0.00919184	0.0056812	0.00380521	0.00212534	0.0698046	0.0719744	0.10461	0.136683	0.140609	0.157958	0.223738	0.309859	0.370399	0.524305	0.293903	0.504617	4.24013	3.58104	2.67669	2.67056	2.06893	1.45809	1.32163	1.63182	1.80424
2	'M'	75	160	75	Left index finger'	70	95	-4	20	-8	-41	-22	63	-17	-40	chc62v72had61agb7q6g.txt	0.530522	0.781623	0.253908	0.104722	0.0427747	0.0478702	0.0261554	0.00971561	0.0140666	0.00990872	0.0048343	0.00437646	0.00934985	0.0122856	0.0209808	0.0642019	0.0584371	0.043956	0.0777461	0.0825456	0.0524333	0.0850244	0.120515	0.133573	3.97007	3.3015	2.70945	3.10372	2.85926	2.21636	2.4924	2.35575	1.74897
13	'M'	50	170	85	Left index finger'	66	97	-7	19	8	-26	-36	1	45	-23	cg06igivjtonbn3dcplg.txt	0.507159	0.774369	0.316159	0.164227	0.0556091	0.0361496	0.0364022	0.0180715	0.00539777	0.00559913	0.00417037	0.00256792	0.0345926	0.0473037	0.0567991	0.0602318	0.076336	0.112521	0.0644632	0.0936619	0.213529	0.174654	0.190481	0.254801	4.0828	3.44636	2.8288	2.26933	2.87624	2.27362	1.52406	1.53102	2.03408
8	'M'	59	165	65	Left index finger'	61	92	-9	19	27	-16	-29	5	26	-19	cdd1gasg0t8bqalbq0t0.txt	0.503544	0.765608	0.350949	0.204106	0.0795601	0.0575346	0.0479507	0.0254923	0.0161786	0.0139891	0.00930772	0.006032	0.0189576	0.0209458	0.031052	0.0229989	0.026411	0.0454062	0.0349575	0.0446094	0.0533828	0.0517558	0.0580664	0.0995891	4.2247	3.83244	3.03489	2.66669	2.81612	2.34062	1.87728	1.95464	1.71151
29	'M'	70	185	90	Left index finger'	55	97	-2	17	-3	-30	-19	-13	42	2	cborpjqvjtoqui5si2a0.txt	0.548192	0.754674	0.262382	0.125566	0.0555985	0.033071	0.0321222	0.0211979	0.0107388	0.00622076	0.00591697	0.00390639	0.0390308	0.0465354	0.0489196	0.0692678	0.138077	0.0700499	0.0657009	0.107001	0.170731	0.340789	0.31671	0.42094	3.98531	3.41732	2.93284	2.60919	2.9079	2.61848	2.01423	1.7316	1.96604
9	'M'	65	175	65	Left index finger'	69	96	-5	19	25	-33	2	24	-26	-9	cb7nr32vjtoh3rj00hf0.txt	0.522909	0.770282	0.345043	0.16199	0.0871051	0.0766068	0.0383324	0.0216115	0.0195093	0.0115205	0.00723473	0.00516602	0.0160823	0.0212332	0.0244937	0.0550364	0.0329882	0.0311622	0.100878	0.0416989	0.0532513	0.0991232	0.0742777	0.112671	4.20902	3.68578	2.94903	3.11247	2.6135	1.99225	2.12584	1.85167	1.46239
7	'M'	78	165	60	Left index finger'	74	88	-9	12	22	-29	-35	30	54	-9	cg2m4i4g0t8d04b746fg.txt	Inf	0.812631	0.391863	0.271869	0.138393	0.0895065	0.12631	0.0625746	0.0547211	0.0950271	0.0507571	0.0484587	NaN	0.257713	0.419539	1.40864	1.66412	2.12775	3.09395	3.12994	3.60385	4.1776	3.89922	4.09541	4.11495	3.52223	2.72534	2.54608	2.67215	2.07095	2.05273	1.76918	2.24177
18	'M'	60	170	78	Left index finger'	77	93	1	11	-4	-48	65	0	-44	37	cgqilnf2had7n67r8fcg.txt	0.565767	0.722684	0.260787	0.0910933	0.0850994	0.0565376	0.0211934	0.0189126	0.0105217	0.00590764	0.00432232	0.0029728	0.0146172	0.0308855	0.0187518	0.0579004	0.0430741	0.0455213	0.0683665	0.0514215	0.0742865	0.081815	0.0899578	0.144469	3.93733	3.44404	2.94741	3.25902	2.43501	2.22053	2.23569	1.78174	1.78022
7	'M'	74	170	80	Right index finger'	58	92	-17	23	47	-10	-23	-6	31	-3	cgn251kg0t8edo0civ1g.txt	0.449933	0.79875	0.419286	0.268466	0.107263	0.0695844	0.0625356	0.0379846	0.0208047	0.015177	0.0118357	0.00801577	0.0622369	0.0937715	0.0803013	0.0826041	0.112618	0.111867	0.108344	0.120359	0.134858	0.17232	0.171849	0.193692	4.4014	4.0031	3.18131	2.56784	2.73828	2.36799	1.92796	1.75401	1.79862
25	'M'	43	170	72	Right index finger'	67	99	6	0	2	1	-31	29	18	-29	cgn7nev2had620d61qk0.txt	0.602768	0.645275	0.268648	0.193711	0.0744627	0.0585431	0.0488795	0.0241125	0.0120267	0.0106785	0.00790188	0.00467494	0.0305382	0.0360006	0.0767281	0.0862336	0.130815	0.17164	0.126383	0.189113	0.171589	0.195591	0.161427	0.281497	3.96684	3.87365	3.16741	2.76017	2.94913	2.30936	1.75209	1.89073	1.84671
3	'M'	72	168	59	Right index finger'	73	98	-5	21	-2	-48	-10	50	-38	-11	chcbassg0t882og8t660.txt	0.528118	0.779978	0.262432	0.0941396	0.0457743	0.0472814	0.0193245	0.0102593	0.0119421	0.00543159	0.00416841	0.00317748	0.00986185	0.0175444	0.0198201	0.0537881	0.0507624	0.0662205	0.146749	0.172653	0.0816146	0.13058	0.163675	0.217541	3.94073	3.24694	2.59338	3.21872	2.64651	2.00403	2.53549	2.09252	1.63832
26	'M'	54	173	66	Right index finger'	69	96	-10	18	28	-6	-25	12	37	-10	cfvgnaqvjtonbn3d97dg.txt	0.507492	0.715728	0.354688	0.232207	0.105524	0.0792014	0.0680541	0.039743	0.024013	0.022176	0.0168583	0.0106881	0.0822782	0.203585	0.0816137	0.0880652	0.244664	0.157513	0.0816748	0.173706	0.305587	0.355828	0.430605	0.469979	4.31723	3.95416	3.20875	2.84367	3.03204	2.53381	1.93013	1.93313	1.77474
0	'M'	63	175	78	Right index finger'	63	97	-3	12	5	-28	-34	38	32	-13	cgc2pravjtopa61rp3sg.txt	0.54202	0.714952	0.284748	0.142932	0.0493906	0.0481412	0.0423429	0.0229275	0.0144866	0.0131017	0.00971906	0.00626124	0.0214352	0.0398429	0.0155238	0.063164	0.142246	0.110136	0.0590091	0.132008	0.128535	0.108142	0.0816553	0.143788	4.03975	3.5215	2.95744	2.93936	3.18898	2.57677	2.09236	2.19169	1.95846
14	'M'	49	178	85	Right index finger'	73	96	-5	16	10	0	-38	-18	82	-8	chi9tuf2had9fa0j6jng.txt	0.52853	0.743799	0.307537	0.218959	0.0753233	0.0399949	0.0493164	0.0298248	0.00867887	0.00632287	0.0066511	0.00358057	0.0188483	0.036369	0.0389454	0.0691469	0.203743	0.158964	0.0728671	0.108492	0.405964	0.301894	0.139301	0.243544	4.10674	3.62039	3.08596	2.35917	2.72929	2.06577	1.16007	0.999293	1.49931
9	'M'	67	171	84	Right index finger'	60	91	4	12	-19	-21	-24	-26	100	4	cgvs0qf2had61ag64kj0.txt	0.576238	0.727819	0.230602	0.131368	0.0657632	0.0241883	0.0300914	0.0239544	0.011588	0.00741874	0.0055968	0.00323095	0.0829379	0.136402	0.230026	0.218698	0.397299	0.750249	0.300753	0.386406	0.255775	0.68075	0.703653	0.884746	3.77857	3.40176	2.99088	2.40398	2.8071	2.67442	1.98349	1.53136	2.03388
14	'M'	52	183	106	Right index finger'	67	95	-4	10	16	-20	-52	23	21	-33	cg7dm3kg0t8d04b7n0kg.txt	0.524524	0.693406	0.340726	0.198198	0.0563663	0.0447481	0.0374533	0.0165512	0.0065105	0.00512621	0.00386465	0.00312696	0.0815312	0.125191	0.127621	0.0999409	0.311195	0.346998	0.259776	0.397511	0.792954	0.760039	0.501946	0.600662	4.03821	3.55859	2.70705	2.29152	2.7353	1.97165	1.47449	1.86986	1.87028
6	'M'	64	166	65	Right index finger'	71	96	-2	17	-1	-36	-10	19	22	8	chmt4372had5ptrsf66g.txt	0.545061	0.751533	0.263684	0.114597	0.0555038	0.0450807	0.0355221	0.0253133	0.0197703	0.0154826	0.0117486	0.00947754	0.036317	0.0666419	0.13479	0.243354	0.370916	0.215336	0.249893	0.318192	0.271016	0.256168	0.33633	0.348066	3.97158	3.36696	2.94902	3.07772	3.0684	2.69102	2.50991	2.41454	2.16401
7	'M'	64	174	65	Right index finger'	91	95	-12	24	55	-50	-31	44	-45	-27	cborf2qvjtoqui5si060.txt	0.490582	0.79303	0.392494	0.143862	0.0600421	0.0531512	0.0186138	0.0110447	0.00694072	0.00414185	0.00242912	0.00256755	0.108487	0.163634	0.359072	0.527424	1.02812	0.781631	0.712451	1.14366	1.18808	1.35221	1.35485	1.93485	4.01768	3.46294	2.16345	2.38219	1.57477	0.750844	0.74985	1.72267	3.06059
11	'M'	69	175	65	Right index finger'	55	96	0	21	-12	-38	-39	0	45	-13	cbfkgcqvjtoh3rj0eh8g.txt	0.556828	0.784443	0.235034	0.0944561	0.0297342	0.0212719	0.0209665	0.0122871	0.00573501	0.00436297	0.00337038	0.00210896	0.0388032	0.0602709	0.0980098	0.106787	0.292292	0.160753	0.111946	0.182856	0.200421	0.258008	0.253267	0.419337	3.8145	3.19903	2.68766	2.44548	2.82005	2.51454	1.99772	1.91725	2.26249
7	'M'	74	176	80	Right index finger'	77	96	-3	17	6	-19	-23	-6	-2	-20	cg3fa0f2had4qgopfleg.txt	0.546776	0.730111	0.296455	0.162817	0.0684068	0.0444052	0.0277354	0.0143531	0.00818405	0.00525565	0.00326716	0.00278724	0.0675044	0.129252	0.14171	0.199582	0.223039	0.213866	0.234365	0.242523	0.389074	0.339121	0.383341	0.520906	4.00669	3.50629	2.82803	2.52076	2.5684	2.2238	1.94195	1.87888	1.63223
3	'M'	71	170	70	Right index finger'	58	95	-3	19	0	-33	-32	-21	37	9	cg9cckkg0t8d04b7u5dg.txt	0.541628	0.762036	0.272712	0.126355	0.0479955	0.0262759	0.0227883	0.016732	0.00892185	0.00495416	0.00343963	0.00258715	0.0204729	0.0316326	0.0229504	0.0523365	0.0974267	0.12407	0.0706518	0.108679	0.178636	0.190328	0.266367	0.228216	3.96159	3.36046	2.76673	2.42088	2.67523	2.55151	2.19614	1.89088	1.91286
11	'M'	58	168	65	Right index finger'	66	94	-5	11	19	-6	-41	19	27	-20	cgn7ijn2had620d61or0.txt	0.533222	0.711702	0.317939	0.216596	0.0711404	0.0553813	0.0499322	0.0265711	0.0121727	0.00798261	0.00698739	0.00459925	0.0211592	0.0385761	0.0737632	0.0756196	0.172266	0.105704	0.0976601	0.212486	0.237814	0.272789	0.213794	0.292351	4.1397	3.84419	3.09556	2.55322	3.01141	2.37023	1.70961	1.56193	1.63297
31	'M'	61	160	60	Right index finger'	52	98	-6	17	6	-23	-10	-53	58	52	cgvqntcg0t889ug8s6v0.txt	0.502835	0.764622	0.306686	0.165056	0.0798959	0.0214132	0.0232884	0.0260464	0.0166783	0.00734251	0.00458397	0.00446317	0.0284473	0.0383485	0.0412991	0.0475134	0.0674571	0.191499	0.121523	0.0871742	0.133373	0.191198	0.190121	0.159459	4.12363	3.49004	2.93706	2.35006	2.25151	3.09636	2.55127	1.91135	1.63903
3	'M'	70	169	60	Right index finger'	71	95	0	18	-4	-37	-41	-15	15	-20	cborcpivjtoqui5shvfg.txt	0.552994	0.761943	0.26195	0.113995	0.0363383	0.0208723	0.0160837	0.00863011	0.00441983	0.00377562	0.0024481	0.00174142	0.0148954	0.0177056	0.014568	0.0367128	0.0530585	0.0660455	0.0693198	0.100327	0.184908	0.201819	0.298538	0.330557	3.84906	3.26883	2.59761	2.25624	2.62914	2.34033	1.99281	2.17974	2.18952
0	'M'	47	173	95	Right index finger'	67	96	-5	14	18	-30	-31	18	9	-16	cg3f3nsg0t8d04b77dj0.txt	0.522402	0.740627	0.328215	0.165847	0.0604244	0.0472305	0.034541	0.0179894	0.0100647	0.00854728	0.00587501	0.00349857	0.0267744	0.0302409	0.0522339	0.0592228	0.0753842	0.0792294	0.0547851	0.103702	0.114122	0.137859	0.160563	0.220488	4.08839	3.61855	2.81851	2.64139	2.72859	2.26876	1.9122	2.01067	1.8748
0	'M'	53	170	80	Right index finger'	72	94	0	4	13	-17	-38	31	-23	-35	cgiifdf2had620d4fu40.txt	0.557648	0.65056	0.336576	0.179677	0.0679879	0.0585623	0.03486	0.0121133	0.0103869	0.00512788	0.00574834	0.00350412	0.063636	0.198138	0.199117	0.120337	0.559503	0.197997	1.08628	0.587899	1.14417	0.427805	1.86018	1.18349	3.96377	3.66803	2.84417	2.57191	2.50772	1.75557	1.42422	1.73777	1.81269
28	'M'	76	172	82	Right index finger'	73	99	2	25	-26	-57	-58	-28	-9	-37	cfvgl1f2haddiqs1s8m0.txt	0.569276	0.81598	0.19822	0.0568317	0.0126856	0.00583257	0.00348146	0.00156317	0.00130262	0.00145321	0.00100241	0.00114288	0.0182189	0.0196589	0.047859	0.107673	0.281511	0.408322	0.508007	0.647128	0.617877	0.430466	0.729911	0.560869	3.51498	2.84885	2.30106	2.09262	2.80386	2.58432	2.60464	3.60387	3.40992
5	'M'	67	175	88	Right index finger'	58	95	-12	28	18	-27	1	-26	47	22	cgglh3n2had620d3kvkg.txt	0.490081	0.826939	0.326254	0.165464	0.0915946	0.0464233	0.0448937	0.0362284	0.0208549	0.0110336	0.0082262	0.00664355	0.0313926	0.0531712	0.0488066	0.0435147	0.109409	0.0798951	0.0928096	0.0703999	0.135229	0.178999	0.215868	0.317107	4.25826	3.62037	3.13476	2.68526	2.79108	2.70024	2.16875	1.60718	1.42603
29	'M'	43	165	74	Right index finger'	66	96	0	11	0	-8	-21	-19	42	-11	ccoj3h4g0t8fak1mr5tg.txt	0.557975	0.725415	0.272244	0.178026	0.074004	0.0408762	0.0385626	0.0228604	0.0121809	0.00886706	0.00586814	0.00365111	0.0293349	0.0346955	0.0592339	0.0739054	0.0991755	0.177679	0.15169	0.14965	0.207113	0.200434	0.355029	0.397695	4.03954	3.6571	3.06619	2.6225	2.72304	2.34328	1.86739	1.82193	1.85161
1	'M'	43	165	74	Right index finger'	75	94	-4	14	13	-18	-40	-7	9	-20	ccojk8v2hadc9mvgjumg.txt	0.530675	0.745486	0.309075	0.171297	0.0554456	0.0364286	0.0255294	0.0128247	0.004616	0.00386922	0.00338633	0.00242878	0.0241409	0.0323967	0.0388218	0.0680726	0.1194	0.0740593	0.0877381	0.162213	0.331725	0.31616	0.314221	0.364293	4.0296	3.5456	2.80114	2.38546	2.54208	2.00486	1.5125	1.69189	1.92419
11	'M'	56	170	71	Right index finger'	75	99	-2	16	-10	-36	-32	59	23	-29	cgqirlv2had7n67r8j30.txt	0.544915	0.750691	0.247259	0.110405	0.0402663	0.0440357	0.0360457	0.0164379	0.0100777	0.00938715	0.00532293	0.00300021	0.00891017	0.0131488	0.0166642	0.0546343	0.053647	0.0640797	0.0757304	0.154785	0.130097	0.10386	0.146842	0.33236	3.93013	3.3207	2.86831	2.98641	3.12514	2.3845	1.93084	2.22375	1.9038
15	'M'	50	170	70	Right index finger'	66	95	-6	18	13	-17	-10	-24	5	-21	cgvs024g0t889ug8sba0.txt	0.51729	0.773575	0.326948	0.184297	0.089124	0.0450044	0.0255872	0.0176106	0.00727416	0.003671	0.00211062	0.00204747	0.075815	0.101322	0.104278	0.196255	0.156122	0.244696	0.293305	0.268895	0.303763	0.572439	0.572215	0.541668	4.10892	3.43277	3.00768	2.38129	2.13827	1.822	1.43477	1.13513	1.92164
10	'M'	51	170	70	Right index finger'	80	97	-5	14	31	-40	17	13	-44	27	cgqiq7f2had7n67r8i90.txt	0.53035	0.736557	0.35661	0.144244	0.0966375	0.0740802	0.0259051	0.0226976	0.0148629	0.00818863	0.00602655	0.00434306	0.0100591	0.0133473	0.0182652	0.0606072	0.0192783	0.0521038	0.0774915	0.0369868	0.0799504	0.0680068	0.0898404	0.0795961	4.16794	3.64006	2.81981	3.08124	2.34735	2.01125	2.16681	1.69606	1.64681
12	'M'	65	170	70	Right index finger'	81	95	8	9	-18	-12	-58	-4	33	-22	chmtarn2had5ptrsf9i0.txt	0.625442	0.685534	0.221891	0.139318	0.0334955	0.021484	0.0189578	0.0088555	0.00611323	0.00664943	0.00501344	0.00335813	0.0223193	0.0357655	0.0403794	0.0646848	0.186433	0.198173	0.201323	0.471042	0.519081	0.504791	0.413311	0.530837	3.6451	3.43715	2.775	2.2107	2.98891	2.23429	1.85866	3.19869	3.0355
26	'M'	58	172	84	Right index finger'	53	96	-7	19	11	-26	-12	-10	38	7	ccql6rcg0t8fak1n5gjg.txt	0.507177	0.781042	0.316991	0.165073	0.0783765	0.0446272	0.0423054	0.0297592	0.0146204	0.0111057	0.0108199	0.00691456	0.0333521	0.0451994	0.0721861	0.121863	0.187568	0.162498	0.130587	0.197051	0.261061	0.126283	0.147891	0.261687	4.20529	3.58541	3.04793	2.68156	2.82488	2.63976	2.04868	1.76877	2.13038
13	'M'	66	164	80	Right index finger'	64	93	-9	16	18	-25	-57	34	42	-33	chb0unsg0t889ug9omrg.txt	0.498015	0.750385	0.327382	0.171657	0.0423399	0.0359501	0.0344493	0.0153914	0.0102752	0.00903494	0.00500329	0.00320506	0.0245694	0.0535919	0.024798	0.0776593	0.441329	0.188324	0.106479	0.359566	0.186327	0.155135	0.329425	0.353986	4.09428	3.44534	2.64824	2.22301	3.16134	2.27786	1.83875	2.33734	1.99482
26	'M'	58	170	60	Right index finger'	69	96	-12	25	23	-31	-45	23	29	-29	cfu9cnn2haddiqs1p7j0.txt	0.487187	0.811851	0.340943	0.16244	0.0494967	0.0396082	0.0347856	0.0165046	0.00818087	0.00680204	0.00383703	0.0016726	0.00584172	0.00915916	0.0124424	0.0276613	0.0484795	0.0728493	0.076099	0.103732	0.120817	0.156723	0.262333	0.326795	4.12672	3.47016	2.66758	2.33213	2.77786	2.1279	1.55016	1.6689	1.44575
0	'M'	43	165	74	Right index finger'	69	93	-15	24	41	-9	-29	-6	54	-10	ccoog5kg0t8fak1msc3g.txt	0.464821	0.786506	0.414995	0.24148	0.0950757	0.0658801	0.0569626	0.032368	0.0171597	0.0151972	0.00995189	0.0067304	0.0825558	0.147782	0.250332	0.200803	0.258287	0.290533	0.327434	0.370478	0.41967	0.429055	0.346462	0.660216	4.3248	3.88255	3.08836	2.62719	2.79341	2.33667	1.78292	1.69498	1.73618
20	'M'	63	170	60	Right index finger'	63	97	-8	22	13	-36	-45	-32	21	-8	cg3f52n2had4qgopfjk0.txt	0.506446	0.78721	0.3192	0.146841	0.0449677	0.0184695	0.0155207	0.00952921	0.00508377	0.00281716	0.00222058	0.00176707	0.0708247	0.109631	0.072045	0.170584	0.370662	0.0824346	0.177335	0.352264	0.347582	0.37928	0.426408	0.569862	3.9952	3.36602	2.57271	1.98742	2.36778	2.34981	1.96504	1.9396	1.79598
9.5	'M'	55	173	73	Right index finger'	66	96	0	8	-4	4	-13	-45	-1	21	chmtcev2had5ptrsfaeg.txt	0.562814	0.700427	0.260671	0.192148	0.092294	0.0343499	0.0204439	0.0163864	0.00938128	0.00486798	0.00350568	0.00279009	0.00994928	0.0233665	0.0137706	0.0368789	0.0705216	0.127966	0.0556353	0.0672151	0.122109	0.159826	0.164366	0.164711	3.97542	3.67826	3.04699	2.42915	2.23503	2.41489	2.01609	1.64283	1.72195
0	'M'	85	170	74	Right index finger'	64	92	-2	11	15	-35	-14	44	10	0	ccqlbjcg0t8fak1n5i40.txt	0.554559	0.686019	0.30762	0.138707	0.0634256	0.0621331	0.0469337	0.0307565	0.0239241	0.0189787	0.014429	0.010743	0.0167201	0.0288246	0.0320056	0.0550287	0.0952521	0.0517537	0.048194	0.0518946	0.0545353	0.0634417	0.0617562	0.0888247	4.09965	3.71168	3.12508	3.203	3.08856	2.66756	2.42241	2.27534	2.03081
2	'M'	45	175	95	Right index finger'	75	97	0	11	1	14	-26	-21	22	-14	cge12b4g0t8edo09q2b0.txt	0.550613	0.714936	0.284281	0.224486	0.0879025	0.0482641	0.039208	0.0211195	0.00751303	0.00482567	0.00399961	0.00294877	0.0215385	0.0270601	0.0427358	0.0476936	0.0970903	0.0602005	0.0478462	0.146411	0.255732	0.209002	0.2487	0.33952	4.03031	3.80447	3.11622	2.47285	2.47944	1.91547	1.29842	0.995105	1.34356
0	'M'	63	165	70	Right index finger'	64	96	2	8	0	-10	4	-21	23	12	chcat6n2hadcimreg8r0.txt	0.571422	0.698058	0.271059	0.163853	0.0953606	0.0513906	0.0417797	0.0310101	0.0184487	0.0119205	0.00952341	0.00762912	0.0195217	0.0299999	0.0290134	0.0880731	0.0479589	0.0385856	0.0379981	0.0612902	0.0595479	0.0942159	0.134296	0.227921	4.10291	3.62577	3.36998	2.86027	2.86247	2.71128	2.2508	1.82485	1.77869
28	'M'	59	173	70	Right index finger'	65	96	-8	23	7	-35	-30	-10	77	-2	chi9r172had9fa0j6id0.txt	0.505647	0.799418	0.298354	0.132178	0.0495014	0.0305915	0.036364	0.0228673	0.00844686	0.00624716	0.00571882	0.00344331	0.0118731	0.016412	0.0154944	0.0212488	0.0731064	0.0562545	0.0307975	0.0642122	0.121011	0.122963	0.0921985	0.136242	4.05737	3.37569	2.8206	2.40228	3.04761	2.51689	1.72637	1.44758	1.84393
0	'M'	60	176	90	Right index finger'	85	91	-14	29	41	-56	-3	-9	-32	16	cfms582vjtonbn3c02l0.txt	0.478832	0.838308	0.391333	0.105884	0.0636529	0.037641	0.0161905	0.0134263	0.00794257	0.00428285	0.00357616	0.00356001	0.0450288	0.0600021	0.079357	0.20675	0.195157	0.244522	0.443954	0.526313	0.431928	0.815745	0.582976	0.640341	4.12704	3.1146	2.58051	2.57645	1.82956	1.98086	1.90843	1.62617	2.98925
25	'M'	58	168	60	Right index finger'	73	90	-14	25	34	-37	-50	31	22	-30	cg8nppsg0t8d04b7s26g.txt	0.474599	0.81475	0.367481	0.16552	0.042828	0.0388572	0.0323011	0.0142554	0.00773033	0.00693293	0.00481194	0.00286011	0.0359827	0.0571389	0.0410518	0.0664479	0.145364	0.106599	0.15735	0.378402	0.348202	0.364344	0.267277	0.437895	4.13959	3.45537	2.56551	2.36715	2.75832	2.11627	1.69939	1.68102	1.51429
18	'M'	43	165	74	Right index finger'	56	97	-6	19	8	-28	-17	-1	31	12	ccqlh7kg0t8fak1n5k8g.txt	0.531831	0.763442	0.281316	0.134474	0.0571872	0.0433684	0.0389817	0.0238748	0.0119222	0.00969289	0.00771936	0.0039217	0.0262083	0.0465791	0.0435107	0.0628775	0.103516	0.0912198	0.0782594	0.1201	0.139361	0.133835	0.156388	0.260472	4.05973	3.45191	2.98546	2.72458	2.9338	2.52061	1.99003	1.79717	1.88776
18	'M'	36	172	60	Right index finger'	81	95	-29	22	67	33	-36	5	12	-24	cg81sucg0t8d04b7pa40.txt	0.394213	0.788504	0.455762	0.419295	0.144344	0.105869	0.0790395	0.0374323	0.0162902	0.0143607	0.0114367	0.00631884	0.0237389	0.020517	0.0791361	0.0528674	0.0736391	0.0580412	0.077641	0.169377	0.215679	0.188658	0.187586	0.351165	4.42136	4.31822	3.16493	2.54991	2.52877	1.74471	1.09475	1.09181	1.02407
0	'M'	61	168	80	Right index finger'	62	95	-9	23	17	-17	-34	-16	32	-14	chlhngkg0t8fl7e6m7qg.txt	0.508193	0.788781	0.311797	0.187415	0.0698967	0.0365346	0.0339612	0.0191451	0.00841136	0.00643289	0.00563119	0.00370172	0.0178973	0.0274241	0.0265018	0.0270078	0.0512347	0.0303021	0.0450712	0.0761968	0.113478	0.149063	0.15067	0.154648	4.11598	3.63521	2.88947	2.33287	2.63634	2.3161	1.7013	1.56453	1.74165
12	'M'	43	175	80	Right index finger'	51	91	-3	14	2	-11	-17	-41	43	21	cg1bb6v2had4qgop5130.txt	0.540656	0.733038	0.279422	0.173173	0.0768543	0.0316492	0.0306789	0.024086	0.0126386	0.00680393	0.00590399	0.00464563	0.0213715	0.0239384	0.0306653	0.0275002	0.0492529	0.0253359	0.0369417	0.038127	0.0712672	0.0328731	0.0727531	0.0733873	4.06103	3.58845	3.09028	2.45729	2.61029	2.63419	2.1262	1.69094	1.80611
9	'M'	63	178	72	Right index finger'	76	97	-10	23	30	-25	-39	34	0	-29	cgptnhn2had7n67qve70.txt	0.524843	0.739264	0.330909	0.178911	0.0563313	0.0577681	0.0397621	0.0174091	0.0130474	0.0113873	0.00793917	0.00567917	0.0659858	0.126349	0.0981412	0.119739	0.190949	0.233415	0.231333	0.319442	0.44998	0.425267	0.463821	0.449506	4.08546	3.58964	2.77066	2.69491	2.78969	1.98174	1.60408	1.77114	1.52413
6	'M'	34	178	90	Right index finger'	66	98	2	5	-1	8	-8	-20	48	9	cg3fjmkg0t8d04b77gmg.txt	0.568197	0.68394	0.273766	0.204271	0.100499	0.0574863	0.0561421	0.0383521	0.0197842	0.0119771	0.00981973	0.00717778	0.0213772	0.0329041	0.0371386	0.043172	0.10844	0.0736878	0.044098	0.0987663	0.171592	0.0978768	0.0988554	0.200385	4.14082	3.86352	3.36523	2.81049	2.99374	2.68518	2.08857	1.74466	1.83295
3	'M'	58	170	71	Right index finger'	64	92	3	9	-3	-3	-3	26	5	-1	cfvgqoivjtonbn3d98l0.txt	0.589613	0.66582	0.254051	0.171424	0.0905126	0.0774587	0.0539253	0.0342652	0.0269754	0.0214466	0.0156036	0.0119182	0.0214721	0.0369391	0.0287943	0.0522718	0.0510874	0.0400757	0.058228	0.076193	0.0577805	0.0736859	0.0775842	0.0875759	4.14307	3.82133	3.33482	3.25518	3.18725	2.75302	2.4812	2.35866	2.13708
4	'M'	48	170	80	Right index finger'	83	96	0	14	3	-44	-18	35	-35	-43	cgn73i4g0t8edo0ckvdg.txt	0.548205	0.749968	0.274392	0.102999	0.0486391	0.044105	0.0185094	0.00668439	0.00640354	0.00327185	0.00158686	0.001205	0.00767859	0.0123691	0.0173659	0.0606678	0.0404005	0.0287158	0.0935042	0.132469	0.104701	0.181168	0.329015	0.354612	3.8732	3.3285	2.60906	3.07107	2.39933	1.62846	2.024	1.83144	1.36902
11	'M'	37	170	60	Right index finger'	60	95	0	16	0	-21	-5	-39	-15	20	cgc2lsivjtopa61rp210.txt	0.55292	0.743695	0.280658	0.153928	0.078142	0.0317018	0.0186114	0.0152762	0.0103474	0.00674966	0.00332754	0.00148717	0.0582436	0.0701814	0.0614078	0.070584	0.0997415	0.153233	0.153624	0.184668	0.204985	0.299697	0.41599	0.467095	3.99757	3.5119	3.01838	2.41882	2.1936	2.34208	2.22183	1.85525	1.43647
6	'M'	68	172	70	Right index finger'	68	99	-2	13	4	-2	2	-29	12	19	cgqi2v72had7n67r84sg.txt	0.537823	0.728123	0.289301	0.196326	0.10711	0.0507317	0.0385472	0.0301524	0.0191297	0.0119749	0.00980243	0.00782838	0.0285179	0.0549484	0.061779	0.0535648	0.100177	0.123582	0.11097	0.149778	0.132448	0.193564	0.197846	0.20132	4.16463	3.79985	3.34159	2.75253	2.53035	2.56909	2.23322	1.89234	1.79467
9	'M'	46	175	70	Right index finger'	56	95	8	7	-24	-13	-17	22	52	-4	chd0e1n2had9fa0heva0.txt	0.600725	0.692749	0.209267	0.128078	0.0581862	0.0484302	0.0485656	0.0301394	0.0123423	0.0076993	0.00768905	0.00521687	0.0305625	0.0366743	0.0584132	0.0519055	0.0952847	0.0703539	0.0557239	0.124373	0.184574	0.190038	0.164644	0.306724	3.88202	3.49709	3.27501	2.86264	3.21944	2.67342	1.9926	1.67383	1.93616
1	'M'	59	170	81	Right index finger'	76	92	-10	10	44	-27	-1	11	-18	-10	cc3d0u72hadcsjhi2ceg.txt	0.502047	0.706083	0.395058	0.192782	0.106142	0.0798601	0.0411951	0.0249083	0.0190454	0.0125603	0.00814569	0.00548492	0.00994862	0.0177554	0.0167092	0.0212553	0.0237532	0.0191456	0.0457225	0.0386483	0.0453701	0.047161	0.0709486	0.111739	4.26074	3.83536	3.07991	2.96584	2.52525	2.06167	1.99315	1.75102	1.51107
18	'M'	51	172	80	Right index finger'	79	98	0	13	-21	-28	-28	100	5	-58	cfu9iov2haddiqs1p8p0.txt	0.568252	0.7115	0.213828	0.112723	0.0461305	0.0688601	0.0487119	0.0144975	0.0147019	0.0134584	0.00573989	0.00436768	0.0195946	0.0334484	0.0773984	0.134476	0.113895	0.0548839	0.187297	0.36	0.164345	0.314518	0.433356	0.35021	3.86317	3.4029	3.15741	3.4806	3.21479	2.25623	1.90593	2.48063	1.71213
35	'M'	54	187	107	Right index finger'	72	95	-5	11	27	-4	-61	31	15	-47	cc6sg672hadcsjhidrlg.txt	0.530459	0.712079	0.351708	0.230544	0.0500572	0.0436804	0.033506	0.0115472	0.00474493	0.0048734	0.00254869	0.00271095	0.0568982	0.0728923	0.102602	0.141795	0.229169	0.160549	0.141283	0.414996	0.408326	0.364728	0.507315	0.401563	3.92426	3.86978	2.60811	2.04913	2.41132	1.69127	0.705272	2.10937	1.43262
18	'M'	59	165	65	Right index finger'	78	97	-2	16	7	-22	-17	15	1	-25	cgqiun72had7n67r8li0.txt	0.549309	0.735104	0.294151	0.152926	0.069659	0.0536742	0.0372866	0.0198193	0.0120494	0.00879687	0.00578388	0.00375818	0.0578375	0.108374	0.064605	0.175845	0.155685	0.205538	0.282558	0.275949	0.262478	0.370119	0.36755	0.453972	4.11206	3.51879	3.02994	2.86059	2.68216	2.48102	2.02003	1.93207	1.67101
9	'M'	73	162	68	Right index finger'	65	94	3	11	-12	-26	-21	-7	30	-23	cdd1efsg0t8bqalbq0c0.txt	0.581359	0.713054	0.236181	0.124916	0.0519064	0.0373673	0.0268208	0.0137752	0.00881679	0.00557789	0.00358643	0.00200011	0.0431758	0.121966	0.097729	0.167032	0.298681	0.151177	0.168788	0.303102	0.639868	0.416575	0.800619	0.707595	3.86283	3.37194	2.92729	2.66376	2.85335	2.4072	1.93273	1.95917	1.97439
0	'M'	64	178	78	Right index finger'	82	97	3	4	15	-44	16	-8	-24	5	cdd1r3v2hadc1gjt08ag.txt	0.579432	0.676323	0.310935	0.120376	0.0716559	0.0473221	0.0242145	0.0157815	0.0100444	0.00633613	0.00421913	0.00290656	0.036109	0.0453651	0.0727688	0.123687	0.117033	0.121705	0.153018	0.207322	0.233933	0.223132	0.299541	0.302661	3.93241	3.5403	2.91832	2.95717	2.45291	2.18513	2.19426	1.85153	1.72227
3	'M'	58	174	64	Right index finger'	77	94	2	5	10	-31	-26	24	-31	-23	cgaim9sg0t8d04b828dg.txt	0.562927	0.686929	0.308538	0.147063	0.0582112	0.0486481	0.0213971	0.0103394	0.00892528	0.00476147	0.00275674	0.00192707	0.0211746	0.0233593	0.0655921	0.0956035	0.0816704	0.0717068	0.167131	0.120727	0.140636	0.192035	0.278939	0.280132	3.93829	3.55002	2.70218	2.95829	2.60098	1.92181	1.94439	1.99295	1.73868
9	'M'	60	180	90	Right index finger'	78	94	-32	25	100	-8	-17	-8	4	-19	chb0hb72had61aganleg.txt	0.362359	0.824	0.582145	0.373777	0.170332	0.104132	0.0735238	0.0399076	0.0224608	0.0165873	0.00974128	0.00545043	0.0489397	0.0737744	0.0595126	0.0701482	0.0847762	0.0863256	0.104521	0.148581	0.148588	0.174689	0.202947	0.28952	4.66509	3.94953	3.13905	2.6489	2.28022	1.72208	1.30181	1.16359	1.28651
7	'M'	43	165	74	Right index finger'	68	95	3	4	1	5	-9	-11	22	4	cd8bm8v2hadc9mvhvu20.txt	0.593493	0.658698	0.278843	0.170622	0.090829	0.0560952	0.0516278	0.0261508	0.0151184	0.00657429	0.00682628	0.00412512	0.0470674	0.148385	0.252139	0.212646	0.371297	0.237033	0.503542	0.222884	0.827262	0.386697	1.24536	0.572593	3.96405	3.66362	3.22516	2.75523	2.78859	2.16676	1.52571	1.45059	1.48744
10	'M'	61	172	80	Right index finger'	74	88	-20	-2	73	4	-45	-1	40	-30	cge0o3cg0t8edo09pspg.txt	0.450187	0.613625	0.47823	0.338179	0.0932821	0.0689358	0.0614836	0.0258096	0.0128616	0.0107681	0.00697124	0.00400956	0.0735381	0.0488423	0.0837884	0.0958385	0.144231	0.0908908	0.121549	0.178996	0.15891	0.163467	0.253708	0.373032	4.28757	3.96511	3.10096	2.44165	2.44236	1.81402	1.21469	1.05315	0.992138
24.5	'M'	48	170	80	Right index finger'	78	94	-5	8	46	-33	13	35	-14	3	cdd1c772hadc1gjt05d0.txt	0.539044	0.667455	0.389034	0.167996	0.120358	0.105138	0.0616365	0.0447322	0.0378874	0.0286859	0.021901	0.0173938	0.0287411	0.0383911	0.0897414	0.174211	0.237492	0.0968397	0.129606	0.147695	0.13455	0.103207	0.1145	0.221774	4.27694	4.08177	3.1927	3.47549	3.00577	2.54119	2.52536	2.04831	1.78797
7	'M'	76	170	78	Right index finger'	79	93	-1	17	-4	-50	-40	33	-27	-34	cge0qn72had620d2g7ag.txt	0.549809	0.761547	0.259953	0.0917822	0.0276272	0.0284689	0.0127433	0.00537146	0.00403583	0.00278159	0.001417	0.00142156	0.0287884	0.0487899	0.0704616	0.0942694	0.181433	0.123248	0.199233	0.352952	0.453352	0.412566	0.580754	0.528088	3.77147	3.16217	2.3878	2.64379	2.50812	1.91533	1.88982	2.53356	2.5781
4	'M'	52	170	100	Right index finger'	57	96	3	10	-10	-22	-7	-33	71	19	cg0rbnqvjtonbn3dg860.txt	0.572402	0.708503	0.247047	0.136744	0.0679266	0.0328637	0.035648	0.0264136	0.0143093	0.00623699	0.00617042	0.00539088	0.0315196	0.0403792	0.0422794	0.0624396	0.109363	0.112397	0.104129	0.135868	0.225065	0.200017	0.198541	0.151173	3.96626	3.48344	3.1606	2.68653	2.97379	2.86214	2.20335	1.79254	1.83372
10	'M'	43	165	74	Right index finger'	86	97	-21	3	72	1	-37	0	-13	-39	cbsqlrivjtoqui5t2c2g.txt	0.435142	0.66487	0.460037	0.339035	0.117949	0.0776682	0.0454391	0.017625	0.00861814	0.0067223	0.00516995	0.00287059	0.020238	0.0515518	0.096902	0.0532648	0.14307	0.0761292	0.137537	0.224654	0.191445	0.216808	0.230352	0.340898	4.27006	4.15017	3.08196	2.38019	2.29938	1.66254	1.34275	1.50012	1.65203
15	'M'	73	168	67	Right index finger'	66	96	-2	19	8	-18	-2	-9	14	12	cgvr8pv2had61ag646rg.txt	0.527143	0.816644	0.294194	0.164009	0.0875506	0.0511435	0.037128	0.0274698	0.0191952	0.0133586	0.0101901	0.00828931	0.0379369	0.058028	0.0251138	0.0390263	0.06835	0.10673	0.133115	0.127909	0.138781	0.140409	0.12994	0.113194	4.17588	3.69552	3.20189	2.78873	2.60824	2.41632	2.11716	1.84773	1.65934
0	'M'	70	158	76	Right index finger'	56	91	-4	15	4	-24	-17	49	44	-13	chb0ik72had61aganmsg.txt	0.536761	0.719169	0.282489	0.150116	0.0682169	0.0671231	0.0642776	0.0376526	0.0217286	0.0202156	0.0152169	0.0097616	0.0181686	0.0278981	0.0227173	0.0212451	0.0486747	0.0299182	0.0286424	0.0611981	0.0613163	0.0476183	0.055237	0.115181	4.18688	3.6637	3.25661	3.0999	3.3197	2.76389	2.24654	2.2784	2.12958
9	'M'	60	180	80	Right index finger'	96	95	-11	21	35	-25	-57	57	4	-43	chgvh0n2had9fa0ip1bg.txt	0.500627	0.769184	0.371275	0.184482	0.0471045	0.0497808	0.0318705	0.012269	0.00861668	0.00618045	0.00386317	0.00258832	0.0337492	0.0420616	0.0593797	0.219991	0.30763	0.142448	0.253012	0.345778	0.284987	0.206142	0.307761	0.391786	4.08603	3.6453	2.57794	2.38789	2.53205	1.57601	1.49455	1.42107	1.13806
15	'M'	54	175	84	Right index finger'	86	98	-12	3	77	-49	7	2	-25	-9	cghveqsg0t8edo0b5kn0.txt	Inf	0.7536	0.532202	0.217406	0.154011	0.14027	0.146086	0.0974302	0.0771865	0.0709004	0.071446	0.0847979	NaN	0.332999	0.563504	1.48259	2.14096	2.49733	3.22181	3.68828	4.43372	4.82742	4.80542	4.27128	3.78431	3.16988	2.22214	2.62394	2.13167	1.94816	1.57076	2.48204	1.72758
7	'M'	52	167	73	Right index finger'	83	96	-8	13	17	9	-24	-16	16	-16	cghvplv2had620d48u50.txt	0.509358	0.721119	0.320274	0.252563	0.104551	0.0559427	0.0446156	0.0255307	0.0109598	0.00720828	0.00539897	0.00343887	0.0435504	0.0594181	0.0786332	0.0919446	0.137726	0.095751	0.0907706	0.232809	0.22782	0.213595	0.295796	0.417912	4.16656	3.78666	3.02022	2.55549	2.54392	1.96727	1.29592	1.26177	1.27948
21.5	'M'	60	175	70	Right index finger'	59	95	0	14	-5	1	-4	-30	13	11	chi9pu4g0t88crmjiml0.txt	0.553303	0.748544	0.264517	0.184613	0.0947129	0.0468002	0.036082	0.0257583	0.013514	0.00751646	0.00581271	0.00425707	0.0322402	0.0374316	0.0461381	0.0363989	0.0695598	0.0443736	0.071225	0.0827013	0.0911989	0.110146	0.149981	0.186892	4.09968	3.69631	3.2202	2.62921	2.53657	2.45244	2.00738	1.67266	1.65201
14	'M'	69	178	80	Right index finger'	70	96	-12	23	18	-8	-35	-20	84	1	cgqi7kf2had7n67r87d0.txt	0.49154	0.786867	0.319119	0.205347	0.0713044	0.0363648	0.0476565	0.0318715	0.0111167	0.0111647	0.0106623	0.00668831	0.0232027	0.0342219	0.0379754	0.0591336	0.107953	0.0974281	0.0568252	0.0847246	0.155618	0.102	0.0820907	0.123373	4.21193	3.63636	3.03428	2.41287	3.18649	2.63778	1.86002	1.71781	2.04077
0	'M'	49	177	75	Right index finger'	80	95	-18	17	86	-41	35	9	-34	36	cfpee4f2haddiqs1c590.txt	0.456404	0.770922	0.497526	0.211022	0.15062	0.118387	0.0483169	0.042831	0.0352108	0.0245762	0.0153087	0.0118109	0.0250831	0.0210507	0.0372214	0.10874	0.0583548	0.0346236	0.0575269	0.0289306	0.0259083	0.0427294	0.0388159	0.0831434	4.37514	3.94442	3.02396	3.30987	2.25736	1.94104	1.81168	1.31028	0.786355
15.5	'M'	43	175	60	Right index finger'	81	84	-7	-8	28	-13	0	43	16	14	cg9cer2vjtopa61r98q0.txt	0.495613	0.805827	0.329273	0.183047	0.114751	0.0958045	0.0580803	0.0440343	0.0412545	0.0243616	0.0187912	0.12861	0.213323	0.689498	0.497984	0.856931	0.7555	0.782494	0.866458	1.24678	1.14917	1.48944	1.99123	4.72109	3.55426	2.9663	2.69195	3.41645	2.40574	2.58152	3.28164	2.97961	2.86818
8	'M'	61	172	61	Right index finger'	63	96	-5	17	2	-32	-45	65	17	-47	cfpe4hn2haddiqs1c43g.txt	0.530064	0.756361	0.279734	0.132717	0.0395627	0.0444673	0.034549	0.0115568	0.00955756	0.0088908	0.00437185	0.00203029	0.00737844	0.0140684	0.0151138	0.0202684	0.0344513	0.0366962	0.0338941	0.102072	0.114832	0.0865798	0.132458	0.223069	4.00152	3.40613	2.76519	2.65893	3.02225	2.28535	1.84243	2.36085	1.85787
5	'M'	69	165	60	Right index finger'	87	96	0	5	36	-55	100	-10	-30	64	cfpeci2vjtonbn3cc4e0.txt	0.537678	0.656612	0.409821	0.126663	0.13863	0.0877839	0.0423994	0.0432709	0.0271112	0.0207631	0.0150247	0.0108969	0.0223569	0.0153306	0.0516619	0.0727798	0.0211655	0.0389977	0.0638883	0.0241619	0.0362366	0.0332139	0.0442492	0.0543959	4.2895	3.86157	3.04606	3.44534	2.62394	2.69399	2.32757	1.97168	1.80441
14	'M'	54	166	73	Right index finger'	64	93	0	12	0	18	-15	4	33	-4	cgqivcf2had7n67r8ls0.txt	0.556067	0.723277	0.268372	0.220787	0.0975882	0.07299	0.0648152	0.039061	0.0208215	0.0187191	0.0137871	0.00924463	0.0264104	0.0268388	0.0482957	0.04959	0.0726719	0.03696	0.0470265	0.0695937	0.0915374	0.0643456	0.0745121	0.111334	4.16445	4.05581	3.28636	2.88242	2.96725	2.56312	2.02841	1.92623	1.81522
17	'M'	58	175	75	Right index finger'	75	97	-3	8	14	-47	1	76	-35	19	cfpe73ivjtonbn3cc37g.txt	0.544286	0.69085	0.310514	0.1136	0.0631277	0.0750455	0.0323547	0.0250154	0.0214592	0.0131733	0.0111401	0.00767685	0.0101031	0.0160964	0.0203572	0.0606183	0.0485914	0.0388365	0.0738739	0.0355828	0.0508357	0.0537012	0.0554943	0.0878767	4.04823	3.61526	2.66516	3.53874	2.9117	2.34404	2.63954	2.13746	1.98871
8	'M'	62	165	70	Right index finger'	86	95	-15	5	84	-50	-41	26	-13	-14	cghvhfv2had620d48o6g.txt	0.469732	0.66285	0.516038	0.178636	0.0541839	0.0490805	0.0277501	0.016617	0.0100595	0.00659734	0.00410875	0.0024386	0.0199077	0.0336844	0.0346935	0.114683	0.112359	0.064606	0.0966264	0.120729	0.131252	0.109781	0.177064	0.2452	4.24717	3.54498	2.51029	2.97302	2.3333	1.82879	1.58529	1.33854	1.10832
21.5	'M'	56	174	75	Right index finger'	86	98	1	16	-19	-36	-23	48	-16	-46	cfut742vjtonbn3d6ht0.txt	0.557547	0.768817	0.222713	0.0948061	0.0380866	0.0394519	0.0220058	0.00634663	0.00578895	0.0038167	0.00240811	0.00158116	0.0272714	0.02799	0.0518466	0.124674	0.109422	0.129874	0.168011	0.40181	0.442068	0.534261	0.466088	0.632731	3.80148	3.20129	2.68891	3.02067	2.62318	1.8336	1.85576	2.04139	2.01186
12	'M'	70	170	73	Right index finger'	67	94	-4	11	18	-17	-40	24	22	-24	cg0r5f2vjtonbn3dg630.txt	0.528102	0.723132	0.328797	0.185826	0.0591641	0.0483937	0.0387372	0.0188566	0.0106828	0.00966689	0.00654862	0.00460968	0.0251388	0.0279653	0.0571106	0.0421138	0.0480989	0.0797135	0.0411903	0.0963618	0.096604	0.103479	0.0758367	0.14088	4.09737	3.74085	2.88546	2.5547	2.864	2.28503	1.8208	2.01701	1.87488
23.5	'M'	80	175	70	Right index finger'	82	98	-3	16	0	-25	-48	15	28	-28	cfmshuqvjtonbn3c07n0.txt	0.544101	0.739279	0.281826	0.134895	0.051506	0.0341783	0.0215961	0.0124468	0.0082582	0.00517578	0.00309092	0.00201013	0.0573262	0.107181	0.0770495	0.218031	0.571154	0.332533	0.302072	0.584754	0.716284	0.733053	0.709762	0.779209	3.91722	3.37979	2.60534	2.48002	2.70547	1.9725	1.62052	1.79561	1.65282
16	'M'	51	175	80	Right index finger'	82	95	-19	3	91	-30	-17	19	-29	-6	cfpe6aavjtonbn3cc2t0.txt	0.449615	0.65897	0.541102	0.229855	0.115103	0.0979548	0.034924	0.0274395	0.017607	0.0112604	0.0101418	0.00538145	0.0662345	0.105714	0.114122	0.29127	0.182352	0.817559	0.275613	0.708057	0.515089	0.823457	1.66479	0.455121	4.32378	3.89588	2.82413	2.92471	2.25298	1.84078	1.81867	1.8699	1.64291
17	'M'	71	172	80	Right index finger'	56	97	-4	17	4	-27	-20	-40	40	28	cfpe8tavjtonbn3cc3n0.txt	0.542912	0.728039	0.281879	0.136216	0.0668228	0.0277609	0.0203676	0.018064	0.01143	0.00669715	0.0050102	0.00398401	0.0603311	0.126421	0.105758	0.31436	0.250695	0.261456	0.260921	0.271579	0.461003	0.577201	0.487197	0.494158	4.02072	3.51059	2.9804	2.48942	2.47896	2.75975	2.48256	2.0805	2.05165
9	'M'	60	180	78	Right index finger'	57	96	2	4	0	-4	-12	7	39	-6	cggl9icg0t8edo0am84g.txt	0.573227	0.674117	0.264121	0.17457	0.0781369	0.057874	0.0540056	0.0316212	0.0175115	0.0141003	0.0116307	0.00784844	0.0341745	0.0576657	0.063646	0.0971869	0.142551	0.0773625	0.0803945	0.123154	0.141641	0.141618	0.150265	0.251947	4.04948	3.77973	3.15482	2.81927	3.15135	2.72233	2.20525	2.06037	1.96339
18	'M'	60	175	86	Right index finger'	68	96	3	11	-18	-41	-20	69	-27	-21	cfpe33qvjtonbn3cc1tg.txt	0.573843	0.715387	0.225785	0.0904639	0.0400144	0.0453549	0.0213439	0.0111909	0.0100595	0.0061831	0.00368343	0.00255604	0.00968896	0.0133485	0.0125836	0.0598895	0.06563	0.0495206	0.0846841	0.0712157	0.0983773	0.149332	0.182446	0.197082	3.76268	3.27257	2.62751	3.29129	2.85936	2.25101	2.49302	2.27198	1.92403
19	'M'	50	160	60	Right index finger'	65	96	-2	13	3	-18	-22	11	16	-8	cggl834g0t8edo0am7j0.txt	0.568334	0.712359	0.254791	0.138243	0.0554533	0.0372183	0.0329782	0.022295	0.0110072	0.0100139	0.00704623	0.00597128	0.0693484	0.179293	0.137366	0.227137	0.715011	0.685175	0.522929	1.03617	1.56927	1.49587	1.14502	1.40878	3.86443	3.3496	2.90377	2.61609	2.7211	2.28076	1.64997	1.80322	2.19442
10	'M'	65	170	62	Right index finger'	73	94	7	4	-8	-4	-37	29	3	-34	cfusgc2vjtonbn3d6e3g.txt	0.600677	0.675666	0.250677	0.169013	0.0581076	0.050964	0.0353899	0.015233	0.00847172	0.0070504	0.00435041	0.00229695	0.0189574	0.0280494	0.0287378	0.0537185	0.0876913	0.070855	0.0932712	0.157265	0.189474	0.197437	0.217513	0.43538	3.90948	3.64759	3.02887	2.80719	2.8464	2.15445	1.69771	2.06459	1.88352
14	'M'	75	160	60	Right index finger'	91	99	-2	20	-10	-59	64	-18	-33	67	chmt9nv2had5ptrsf91g.txt	0.541247	0.778461	0.247138	0.0684262	0.0608845	0.0339633	0.0143545	0.0160108	0.0073505	0.00540333	0.00436222	0.00224333	0.00684764	0.013746	0.0222177	0.0548335	0.0374429	0.0917065	0.0921308	0.0665262	0.191733	0.175287	0.164724	0.265098	3.8831	3.11453	2.87495	3.00899	2.29167	2.60765	2.31229	1.85978	2.06981
2	'M'	71	172	80	Right index finger'	87	92	-4	13	32	-55	62	-9	-37	67	cfpeao2vjtonbn3cc3vg.txt	0.530629	0.719923	0.370641	0.116099	0.0983457	0.0658941	0.0272447	0.0290522	0.0191276	0.0135946	0.00994722	0.00737501	0.00669127	0.025385	0.0554523	0.0478236	0.0555373	0.0592284	0.123342	0.053531	0.0720482	0.110513	0.116125	0.152306	4.18811	3.63589	2.85242	3.28087	2.52243	2.57396	2.35038	1.9967	1.90172
17.5	'M'	67	166	60	Right index finger'	62	93	-4	20	11	-19	-17	16	17	-12	cg829f4g0t8d04b7peig.txt	0.529429	0.779593	0.300951	0.168344	0.0732533	0.0580087	0.0465653	0.0268426	0.0172856	0.0137386	0.00980404	0.00623921	0.0359272	0.0562565	0.0431385	0.087072	0.0856574	0.127602	0.114851	0.135296	0.129565	0.12877	0.162559	0.171837	4.17243	3.70997	3.12787	2.85617	2.87651	2.40738	2.01015	1.9798	1.78585
7	'M'	69	170	79	Right index finger'	62	94	2	13	-25	-59	-12	39	51	33	cfus8s2vjtonbn3d6ca0.txt	0.563328	0.761371	0.206706	0.0599409	0.025254	0.0213799	0.0274704	0.0230814	0.024139	0.0157289	0.0125149	0.0103641	0.0345121	0.0604513	0.107008	0.269785	0.541948	0.682969	0.428322	0.495231	0.595895	0.565681	0.478964	0.771485	3.66277	2.9507	2.3677	2.58716	3.19357	3.11805	2.91242	2.44946	3.55598
7	'M'	47	185	101	Right index finger'	65	93	-12	-7	42	14	-26	22	19	-30	chc60hv2had61agb7oag.txt	0.477927	0.579633	0.38902	0.319529	0.136318	0.112741	0.0893735	0.0440929	0.0297121	0.0284319	0.019744	0.0126474	0.0485025	0.052138	0.0614593	0.080384	0.135413	0.0998508	0.140748	0.241146	0.162001	0.150486	0.275788	0.285758	4.30565	4.36655	3.48515	2.99157	3.09783	2.46003	1.90608	2.02023	1.78874
8	'M'	71	170	49	Right index finger'	76	98	-1	15	11	-38	23	21	-29	24	cbfkjqsg0t87cj2o7v4g.txt	0.54702	0.739892	0.303375	0.130393	0.086329	0.0723766	0.0339833	0.0265186	0.021049	0.0122279	0.00872621	0.00653361	0.0187815	0.0303425	0.0399668	0.0875861	0.0634652	0.0572306	0.107532	0.0731398	0.0546253	0.0930262	0.0837113	0.097933	4.13575	3.57753	3.03402	3.22204	2.75999	2.3228	2.39585	1.91917	1.59502
20	'M'	45	165	68	Right index finger'	67	97	-1	16	0	-5	-20	-6	19	-15	cg81s6v2had4qgoq6s5g.txt	0.544711	0.754368	0.275896	0.183722	0.0838931	0.0502679	0.0416498	0.0247394	0.010247	0.00634929	0.00496614	0.002939	0.0267439	0.0464002	0.0357727	0.0406165	0.0906627	0.0789591	0.0859565	0.125509	0.243524	0.195931	0.185764	0.210207	4.10975	3.61554	3.11291	2.67034	2.72281	2.29049	1.62702	1.30873	1.73504
0	'M'	59	170	74	Right index finger'	86	93	10	5	-3	-28	-6	19	-36	0	cgn74mn2had620d61jbg.txt	0.614163	0.6725	0.278586	0.138502	0.0693562	0.0558079	0.0236828	0.015552	0.011223	0.00637602	0.00431636	0.00280861	0.0131458	0.027622	0.0733089	0.0881677	0.0436313	0.0566532	0.10455	0.0653979	0.102744	0.118472	0.167917	0.153088	3.85881	3.72374	2.87756	3.05254	2.44434	1.92479	2.12038	1.76262	1.51729
25	'M'	75	168	69	Right index finger'	59	97	1	17	-18	-41	-32	12	70	0	cgqima72had7n67r8flg.txt	0.566709	0.752195	0.224446	0.0933186	0.0335533	0.0289386	0.0305751	0.0192263	0.00938664	0.00621184	0.00565795	0.00317111	0.0261555	0.0247538	0.0409261	0.0966334	0.272157	0.188188	0.104056	0.126922	0.177164	0.346582	0.235169	0.365713	3.82149	3.21113	2.85777	2.74232	3.23628	2.7531	2.09262	1.86232	2.11758
0	'M'	54	172	95	Right index finger'	66	98	-4	9	-4	37	-20	-29	12	-16	cb8bb5n2hadbnne2ouig.txt	0.529393	0.711628	0.265162	0.25485	0.112053	0.0518444	0.0394768	0.0214414	0.0106781	0.00675027	0.0051484	0.00299958	0.0343697	0.0384017	0.0612008	0.0518832	0.0566005	0.0628961	0.0678321	0.097031	0.121733	0.136014	0.263732	0.349786	4.1289	3.90234	3.18102	2.50331	2.53811	2.29088	1.78932	1.61006	1.58318
0	'M'	41	176	100	Right index finger'	70	92	-2	16	-9	-29	-51	82	13	-42	cfqoggqvjtonbn3ci9b0.txt	0.548136	0.767719	0.239611	0.112411	0.0314343	0.0363723	0.028781	0.0104255	0.00743731	0.00630917	0.00433762	0.00255205	0.0626489	0.0962518	0.134262	0.266188	0.323791	0.312245	0.301112	0.421289	0.51768	0.717465	0.779044	1.63878	3.83121	3.26394	2.75468	2.66114	3.16073	2.23323	1.78913	2.3178	2.18585
7	'M'	36	183	78	Right index finger'	69	97	4	7	-2	0	-25	5	9	-27	cfqoj5n2haddiqs1fldg.txt	0.570858	0.691235	0.289277	0.186786	0.0727471	0.062381	0.0426615	0.0190194	0.00928645	0.00715548	0.00492636	0.00313767	0.0408638	0.0527751	0.0962011	0.150848	0.206415	0.147546	0.209218	0.361259	0.319697	0.370367	0.535514	0.657771	4.00663	3.73291	2.99791	2.74088	2.69188	2.01848	1.52984	1.57775	1.53431
2	'M'	56	170	74	Right index finger'	84	91	-10	4	40	-10	-38	-22	-1	-28	cg9cdmcg0t8d04b7u5ng.txt	0.493727	0.674595	0.395453	0.23858	0.0793912	0.043199	0.0272631	0.0123615	0.00602248	0.00322304	0.00164144	0.00117314	0.0192727	0.0187784	0.0435649	0.070589	0.0876775	0.0536015	0.0710354	0.181218	0.176339	0.287413	0.278637	0.472521	4.13799	3.73064	2.81312	2.39476	2.26291	1.60796	1.19659	1.29609	1.14388
0	'M'	71	172	72	Right index finger'	59	89	-14	32	17	-39	-41	-6	64	-7	cfqoi02vjtonbn3cia30.txt	0.47619	0.844579	0.330085	0.145792	0.0506692	0.0268637	0.0306677	0.0193642	0.00801821	0.0068052	0.00611081	0.00331515	0.0241614	0.0349316	0.0334771	0.0637026	0.125429	0.135314	0.0878216	0.104647	0.164144	0.144683	0.149363	0.243226	4.13843	3.34625	2.69102	2.25841	2.88029	2.55764	1.8815	1.74302	2.11032
17.5	'M'	62	173	80	Right index finger'	69	95	2	11	-10	-24	-33	17	10	-25	cfs66aavjtonbn3cpqb0.txt	0.579735	0.707825	0.246198	0.129142	0.0482687	0.0395278	0.0283253	0.0141879	0.00716829	0.0050988	0.00311447	0.00240769	0.0215662	0.0357594	0.0311775	0.0847078	0.119179	0.143365	0.112221	0.178816	0.244761	0.313655	0.447419	0.441302	3.86368	3.40004	2.91388	2.69276	2.83627	2.28142	1.84645	2.01619	2.09691
10	'M'	56	178	66	Right index finger'	61	98	3	7	-10	-20	-13	10	36	-9	cg0rd7qvjtonbn3dg8p0.txt	0.581932	0.693476	0.236975	0.13368	0.0634672	0.0455404	0.0423253	0.0253444	0.0119697	0.00802064	0.00670288	0.00455249	0.0294033	0.0505393	0.0486149	0.0633067	0.0947145	0.0796321	0.0668133	0.0902563	0.12031	0.174904	0.157047	0.18419	3.94403	3.50336	3.11022	2.79024	3.13496	2.72186	2.14982	1.80126	1.91324
32	'M'	67	170	70	Right index finger'	62	95	-10	24	21	-35	-38	18	10	-40	cgchrgavjtopa61rsv00.txt	0.511138	0.7806	0.31931	0.137492	0.0456739	0.0340026	0.0249355	0.00976535	0.00659266	0.00679628	0.00421358	0.00249091	0.0207266	0.0281272	0.0458782	0.0395192	0.0426552	0.0711195	0.0668493	0.115544	0.151404	0.15046	0.167409	0.292893	4.05652	3.35793	2.68228	2.44443	2.66518	2.12375	1.77263	2.21207	1.99497
23.5	'M'	43	165	74	Right index finger'	81	97	2	2	12	-21	-3	10	-21	0	cc7jtv72hadcsjhigea0.txt	0.585635	0.65197	0.294409	0.151503	0.0809841	0.0676699	0.0374042	0.0213626	0.0156311	0.011171	0.00742208	0.00490893	0.0407051	0.0512321	0.124162	0.223218	0.123347	0.132607	0.221058	0.205567	0.244366	0.306395	0.337548	0.346374	4.00758	3.73226	3.1063	3.12337	2.76049	2.33425	2.19885	2.08472	1.75925
7	'M'	69	170	70	Right index finger'	77	95	-4	7	37	-24	-54	91	-19	-44	cca1c9n2hadcsjhio7o0.txt	0.53495	0.694979	0.373235	0.196092	0.0475369	0.0621351	0.033917	0.0121646	0.0132859	0.00732803	0.00401799	0.00313843	0.0218333	0.0447063	0.066276	0.0719665	0.0942574	0.0667631	0.11568	0.121609	0.117074	0.16138	0.169715	0.201222	4.01534	3.81212	2.57686	2.99401	2.60605	1.56479	1.69289	1.52592	1.04062
10	'M'	35	175	110	Right index finger'	81	96	2	4	2	2	-44	-11	46	-17	cgc2n42vjtopa61rp2jg.txt	0.532469	0.723123	0.314471	0.197162	0.0603692	0.0408721	0.0312301	0.019909	0.0113991	0.00725736	0.00617682	0.00713734	0.132336	0.268673	0.268804	0.37053	0.6271	0.553741	0.785816	0.951474	1.3163	0.95397	1.21532	1.02179	3.92487	3.62293	2.75685	2.16608	2.72064	2.31548	1.83448	2.09997	1.62304
15	'M'	65	172	79	Right index finger'	78	97	-5	22	-11	-43	-70	100	-3	-73	chmt2gv2had5ptrsf5hg.txt	0.537269	0.788608	0.234558	0.0892756	0.0150367	0.0311784	0.0188199	0.00350723	0.005879	0.00416443	0.00152789	0.00154288	0.041635	0.0462792	0.079657	0.15197	0.426183	0.144798	0.174738	0.614434	0.277397	0.290526	0.534671	0.474555	3.75267	3.06471	2.3806	3.18885	2.90947	1.83679	1.75915	2.72551	1.84584
28	'M'	51	169	70	Right index finger'	65	93	-25	57	78	-37	-8	49	8	-8	chc5uof2had61agb7mtg.txt	0.42297	0.990343	0.474852	0.206763	0.1025	0.105625	0.0750078	0.0444525	0.0338344	0.0294735	0.0214247	0.0153956	0.0305118	0.0245493	0.0502651	0.0942481	0.0644666	0.0488599	0.0569521	0.0572725	0.120106	0.0683256	0.0685563	0.150289	4.56479	3.7841	3.13731	3.27561	2.9595	2.38809	2.07511	1.96186	1.58865
13	'M'	54	176	102	Right index finger'	80	95	-21	-11	100	-51	-15	19	-21	0	cc80qfcg0t8e9qh5duog.txt	Inf	0.593271	0.638233	0.208189	0.10921	0.0903811	0.0588787	0.0709817	0.0983669	0.0712298	0.0930757	0.033758	NaN	0.176191	0.187499	0.126836	0.200051	0.330045	1.13983	2.80549	3.81806	3.12955	4.09133	3.30645	4.45316	3.8418	2.73949	3.20178	2.44497	2.10527	1.8975	1.6955	1.37249
16	'M'	74	171	86	Right index finger'	67	94	0	15	4	-38	-38	17	-15	27	cgn2dhkg0t8edo0cj2dg.txt	0.544993	0.58634	0.179561	0.127169	0.0831445	0.0683771	0.0608788	0.0492496	0.0440555	0.0395988	0.0376618	0.0375943	0.160927	0.199833	0.574027	0.466273	0.757862	0.718602	0.606806	0.762003	0.760782	0.802172	0.781354	0.760288	NaN	NaN	NaN	NaN	NaN	NaN	NaN	NaN	NaN
9	'M'	54	163	70	Right index finger'	88	97	-1	15	5	-17	-59	100	-2	-59	cfvgodivjtonbn3d97sg.txt	0.54695	0.742525	0.298735	0.173695	0.038162	0.051942	0.0354575	0.00943778	0.00533804	0.00596205	0.00300057	0.00160088	0.0228306	0.0284794	0.0501259	0.0913341	0.162367	0.0910079	0.118833	0.447047	0.382884	0.263728	0.334293	0.510016	3.95509	3.58676	2.75836	2.45262	2.55148	1.63345	0.868966	1.77719	1.19314
28	'M'	49	173	87	Right index finger'	64	97	4	3	-8	17	-15	-37	55	19	cgvqtpf2had61ag63vqg.txt	0.576483	0.676727	0.257279	0.207927	0.0944149	0.0398061	0.0404478	0.0310878	0.0162562	0.00910662	0.00719203	0.00514135	0.0335409	0.0392371	0.0436038	0.0508743	0.0583508	0.0768183	0.0723432	0.090205	0.112987	0.170023	0.144694	0.169551	4.03831	3.8259	3.24051	2.66065	2.75948	2.59075	2.04253	1.66301	1.6543
21	'M'	66	170	78	Right index finger'	59	94	-11	24	13	-17	-14	-59	18	33	cgn795sg0t8edo0cl350.txt	0.481206	0.821098	0.329855	0.184551	0.0808325	0.0222527	0.0179644	0.0148564	0.00621059	0.00283511	0.00319499	0.00271993	0.0461823	0.0400867	0.0674759	0.0510651	0.153906	0.223116	0.206752	0.145799	0.435093	0.529813	0.390727	0.407551	4.11526	3.45277	2.75821	1.99256	1.96408	2.29021	1.80487	1.27719	2.33563
30	'M'	60	165	68	Right index finger'	61	95	-12	24	27	-26	-13	-44	43	9	chgvlv4g0t88crmjb1rg.txt	0.481859	0.799961	0.353911	0.183382	0.0879844	0.0302599	0.0287453	0.0229599	0.0116664	0.00500677	0.00433697	0.00419972	0.0227023	0.0378982	0.0335438	0.0413412	0.0692327	0.110667	0.12342	0.126951	0.125589	0.272092	0.257528	0.31597	4.18813	3.56961	2.89983	2.30467	2.2745	2.41342	1.84191	1.31083	1.39495
15	'M'	43	165	74	Right index finger'	96	100	-3	4	30	-33	26	-32	-39	27	ccg2jdv2hadcsjk33ucg.txt	0.570242	0.528186	0.386783	0.115524	0.159754	0.0494014	0.0471933	0.0221401	0.0330201	0.0106863	0.0144927	0.00777792	0.0875124	0.370023	0.289865	0.343194	0.622737	0.461068	0.993526	0.682954	1.22443	0.923224	1.18666	1.14093	3.9315	3.65622	3.09048	2.78924	2.17	2.17405	2.1571	2.12491	3.24049
0	'M'	60	176	68	Right index finger'	71	92	11	8	-26	5	-22	-32	25	4	cg207sv2had4qgop8ebg.txt	0.625214	0.700747	0.19543	0.151541	0.0664652	0.0297739	0.0246928	0.0171556	0.00866019	0.00421657	0.0028193	0.00230634	0.0126292	0.0238352	0.0493088	0.0720886	0.130134	0.0449716	0.0882341	0.0848732	0.13471	0.177929	0.288145	0.333648	3.78467	3.50603	3.12602	2.57503	2.69738	2.44338	1.92997	1.56242	1.5277
14	'M'	52	165	67	Right index finger'	58	94	-11	28	11	-35	3	-31	68	53	ch3ra4v2had61ag7qkbg.txt	0.49949	0.811255	0.295985	0.133209	0.0732081	0.0347125	0.0415907	0.0391453	0.0245174	0.011673	0.00810491	0.00745713	0.0259043	0.0367331	0.0286096	0.0342844	0.138334	0.142585	0.141183	0.0747077	0.26274	0.406996	0.175083	0.145646	4.17305	3.48669	3.0871	2.73593	2.91938	3.0274	2.40709	1.70721	1.48387
10	'M'	60	165	65	Right index finger'	71	95	-1	15	-8	-33	-40	61	-11	-41	cfu95072haddiqs1p760.txt	0.551173	0.740161	0.252151	0.120686	0.0387922	0.0427899	0.0260872	0.00983776	0.0083999	0.00610538	0.00313929	0.00198546	0.0284274	0.0448083	0.0486232	0.0642073	0.14118	0.095941	0.0707615	0.157103	0.127622	0.114192	0.240235	0.293493	3.89661	3.32438	2.70963	2.97949	2.91404	2.13394	1.91317	2.32484	1.95783
7	'M'	71	171	69	Right index finger'	59	98	-4	16	0	-34	-19	-1	87	0	cg8njnn2had4qgoqaafg.txt	0.531101	0.758968	0.271952	0.12163	0.0508384	0.0366957	0.0437682	0.026416	0.0095903	0.0083596	0.00718172	0.0038267	0.0261479	0.0294584	0.0418123	0.0378982	0.105125	0.149895	0.0796248	0.164797	0.444028	0.257314	0.232566	0.400385	4.00017	3.40342	2.94187	2.63763	3.18747	2.61087	1.90404	1.5022	1.98705
3	'M'	51	176	76	Right index finger'	102	97	-20	16	70	-19	-38	-6	-16	-37	cgvribv2had61ag64cj0.txt	0.436629	0.760968	0.478635	0.267667	0.0893078	0.0583987	0.0322717	0.0131606	0.00696624	0.00509225	0.00282904	0.00213849	0.0426054	0.0461497	0.0429702	0.122799	0.111798	0.118029	0.14467	0.190236	0.246559	0.279677	0.444444	0.496173	4.3035	3.81379	2.71996	2.28095	1.96495	1.26568	0.979291	0.909657	0.625651
0	'M'	73	169	55	Right index finger'	62	96	1	14	-12	-30	-27	26	15	-27	cca1kjn2hadcsjhio990.txt	0.570166	0.728539	0.237984	0.113953	0.0452922	0.0385555	0.0308643	0.0156254	0.00809775	0.00740426	0.00547782	0.00306059	0.0335815	0.0359956	0.0648035	0.0785747	0.104121	0.088812	0.0651618	0.144593	0.104564	0.138459	0.114863	0.199258	3.87752	3.34656	2.95984	2.74297	2.99823	2.52597	2.08905	2.24514	2.15675
8	'M'	67	177	70	Right index finger'	52	95	-6	22	3	-35	-7	-44	79	39	cca1hgv2hadcsjhio8q0.txt	0.520282	0.781557	0.288017	0.13079	0.0673106	0.0256802	0.0286741	0.0264641	0.0145641	0.00522257	0.00591267	0.00590696	0.0153001	0.0212325	0.0224142	0.0398979	0.0592942	0.0868047	0.0418315	0.0647551	0.0966741	0.153369	0.067054	0.130422	4.07024	3.43199	2.95246	2.52081	2.60322	2.88662	2.31929	1.70991	1.72555
12	'M'	35	169	85	Right index finger'	79	96	0	10	6	-41	-3	38	-33	-42	cghvrnkg0t8edo0b5sk0.txt	0.549899	0.715535	0.295501	0.120537	0.0592612	0.0582948	0.0256725	0.00857237	0.00997079	0.00549552	0.00234872	0.00240515	0.0240838	0.0234207	0.0616772	0.113523	0.0586962	0.0556368	0.149394	0.104124	0.0884785	0.186077	0.248377	0.223432	3.93758	3.44304	2.64666	3.16944	2.57308	1.73049	2.09291	1.88784	1.35885
24	'M'	52	170	78	Right index finger'	84	95	0	6	23	-41	-15	16	-46	-10	cg3fb5v2had4qgopfm20.txt	0.566688	0.680226	0.336597	0.135739	0.0646555	0.0508688	0.0177836	0.0108819	0.00708981	0.00390363	0.00203911	0.00134622	0.0171697	0.0229178	0.0374368	0.0690788	0.0733087	0.0624571	0.141518	0.146391	0.195682	0.253457	0.494095	0.51529	3.921	3.51749	2.59456	3.01273	2.14307	1.49417	1.78465	1.34686	1.06473
20	'M'	71	180	73	Right index finger'	58	93	-2	13	2	0	-3	-43	-1	44	chgvdkf2had9fa0iov4g.txt	0.525955	0.766725	0.284361	0.19422	0.0999058	0.0397259	0.0245933	0.0235091	0.0173747	0.0102443	0.0064155	0.00550725	0.0433396	0.0998924	0.074169	0.0781088	0.143652	0.107259	0.111859	0.113925	0.180924	0.197931	0.217079	0.298209	4.13011	3.61828	3.23945	2.56017	2.36601	2.4142	2.32397	1.92025	1.61867
10	'M'	37	178	87	Right index finger'	75	93	-3	5	32	-18	-46	62	-3	-35	chgvoh72had9fa0ip5ng.txt	0.526967	0.693941	0.371002	0.213646	0.0610771	0.0677258	0.0435636	0.0177872	0.0129167	0.00848685	0.0054213	0.00367514	0.0225892	0.0237699	0.0517289	0.0409467	0.0601557	0.0822099	0.067417	0.0894503	0.121612	0.127504	0.121647	0.208757	4.09597	3.88992	2.79227	2.75102	2.7161	1.95311	1.73305	1.70844	1.35051
17	'M'	53	175	71	Right index finger'	78	93	-7	18	21	-37	-47	19	-10	-32	ccaq2tn2hadcsjhiqtog.txt	0.514729	0.764303	0.330554	0.146358	0.0414557	0.0340519	0.0203528	0.00925925	0.00453288	0.00349494	0.00267866	0.00139123	0.0139103	0.0155408	0.0324511	0.0597808	0.0681742	0.0579372	0.11176	0.170574	0.192385	0.188877	0.18253	0.269798	3.99344	3.42445	2.50139	2.45286	2.44008	1.90141	1.57276	1.83765	1.85287
8	'M'	56	174	71	Right index finger'	79	97	1	10	11	-47	21	17	-40	21	cca1nb4g0t8e9qh5ko50.txt	0.562884	0.707684	0.308815	0.106409	0.0761099	0.0583297	0.0213199	0.0187088	0.0133935	0.00639754	0.00510293	0.00340716	0.0126246	0.0256645	0.030947	0.0973251	0.0733431	0.0647762	0.141394	0.0589911	0.122414	0.12698	0.108153	0.191321	3.99434	3.50594	2.75979	3.05746	2.37312	2.21654	2.2494	1.76507	1.85155
18	'M'	48	174	90	Right index finger'	60	95	-6	17	8	-15	-10	-49	80	36	cfu9752vjtonbn3d3sig.txt	0.519064	0.759548	0.300732	0.173277	0.0882594	0.0288039	0.0340325	0.0316251	0.0171935	0.00539	0.0047469	0.0042329	0.0207282	0.0274758	0.0264406	0.0283433	0.0455045	0.0771568	0.069679	0.0504933	0.0866624	0.155006	0.164937	0.0983273	4.12159	3.54253	3.1174	2.5194	2.69041	2.65423	1.96394	1.31574	1.27504
11	'M'	71	170	64	Right index finger'	68	94	-4	15	12	-27	-36	57	6	-32	cgn78b4g0t8edo0cl2mg.txt	0.532362	0.743194	0.305661	0.153551	0.0533667	0.0587195	0.041342	0.0182926	0.01414	0.0118263	0.00739607	0.00484219	0.0106019	0.0185139	0.0314542	0.0781486	0.0800861	0.050254	0.0773478	0.140439	0.0830384	0.0805435	0.135057	0.108451	4.10589	3.6647	2.92609	2.88099	2.9584	2.34435	2.0352	2.15626	1.8379
17	'M'	63	173	85	Right index finger'	70	95	-1	17	-6	-51	-56	72	-36	-55	cgvrklcg0t889ug8sa20.txt	0.546372	0.760482	0.260312	0.086768	0.022451	0.0251622	0.0102198	0.00325002	0.00320626	0.00172657	0.000812914	0.000943817	0.0186484	0.02465	0.029208	0.121471	0.272327	0.119402	0.184679	0.455213	0.252558	0.480935	0.438019	0.657084	3.73255	3.08276	2.22469	2.8478	2.60326	1.86736	2.33083	2.5973	1.96373
28.5	'M'	79	170	90	Right index finger'	58	98	-2	13	-8	-37	-40	80	40	-23	cghvqm4g0t8edo0b5s70.txt	0.537691	0.735532	0.254006	0.108535	0.033871	0.044742	0.0409087	0.0193288	0.00997011	0.0109072	0.00731283	0.00418825	0.0138889	0.0214536	0.0235366	0.0239743	0.0747255	0.0655752	0.0296777	0.094086	0.133588	0.0638628	0.10093	0.160019	3.95546	3.29074	2.83592	2.95291	3.3157	2.59708	2.09047	2.60744	2.24244
2	'M'	61	182	88	Right index finger'	57	93	-1	14	-1	-13	-41	71	15	-41	cfusbiivjtonbn3d6d00.txt	0.548805	0.733238	0.272799	0.165104	0.0537288	0.0623641	0.0481069	0.018655	0.0135605	0.0126428	0.00727833	0.00394579	0.0208442	0.0362387	0.024298	0.0361519	0.0559131	0.0643278	0.0515664	0.103034	0.126644	0.0798887	0.132146	0.19329	4.0609	3.64791	2.99147	2.79806	3.06078	2.30685	1.8527	2.15996	1.7459
11	'M'	47	170	80	Right index finger'	67	94	0	12	-8	-13	-38	38	19	-28	cg8nkof2had4qgoqaau0.txt	0.559128	0.728119	0.250909	0.155442	0.0514045	0.0458667	0.0384234	0.0184035	0.0056129	0.00579367	0.00444284	0.00176258	0.0162698	0.0264856	0.0203291	0.0555853	0.0679207	0.0531202	0.0679578	0.192957	0.215837	0.155509	0.254642	0.491593	3.95786	3.52263	2.92868	2.72918	2.97888	2.35483	1.53614	1.582	1.88156
18.5	'M'	65	170	75	Right index finger'	56	92	-2	9	7	-2	-17	-24	59	15	cgii9osg0t8edo0bb6j0.txt	0.539328	0.703891	0.297864	0.200741	0.0894494	0.0451845	0.0469311	0.0346029	0.0184114	0.0144529	0.0122305	0.00876404	0.0264406	0.031561	0.0473638	0.0280609	0.0396292	0.0446464	0.0589907	0.0737165	0.141237	0.134886	0.075053	0.127419	4.16058	3.85377	3.22936	2.6845	2.8815	2.71785	2.23856	2.05762	2.08424
15	'M'	42	180	89	Right index finger'	80	93	-4	15	17	-20	-34	14	-1	-33	cg3f62sg0t8d04b77e3g.txt	0.52557	0.744179	0.336492	0.184485	0.0644622	0.0495455	0.0326049	0.014028	0.00573221	0.00479992	0.00299825	0.00159107	0.0175533	0.0263565	0.0330453	0.107011	0.0797352	0.0967808	0.164177	0.3306	0.194611	0.150726	0.248906	0.335205	4.05828	3.63851	2.70243	2.66232	2.45208	1.76529	1.16089	1.40154	1.37741
11	'M'	61	165	60	Right index finger'	62	95	2	15	-13	-22	-37	-14	36	-16	cflmh3avjtonbn3bq0gg.txt	0.569473	0.751265	0.240168	0.130347	0.0456414	0.0244682	0.0226986	0.0126617	0.00476389	0.00389774	0.00287472	0.00117277	0.0272838	0.0335545	0.0412229	0.0723567	0.102515	0.0797637	0.0604893	0.0937018	0.22922	0.238052	0.270209	0.896375	3.85358	3.37834	2.79848	2.30901	2.75612	2.3792	1.79679	1.80996	1.97874
13	'M'	50	170	62	Right index finger'	58	98	-2	18	-8	-28	-40	14	66	-2	cfi8vsivjtonbn3b0550.txt	0.541928	0.762916	0.247315	0.120322	0.0374247	0.0314433	0.0339709	0.0210193	0.00755136	0.00732854	0.00743962	0.00443802	0.0438427	0.043949	0.0765291	0.0622695	0.0701565	0.0836294	0.0818317	0.129247	0.162429	0.103427	0.14911	0.234987	3.93873	3.36105	2.86231	2.52057	3.16253	2.71417	2.05284	1.96206	2.38063
16	'M'	58	168	72	Right index finger'	57	96	3	6	-9	-32	-19	30	38	-16	cgqinff2had7n67r8gdg.txt	0.57809	0.687734	0.245161	0.115496	0.0514157	0.0449017	0.0411961	0.022862	0.0147701	0.0134888	0.00954724	0.00574975	0.0190823	0.0234025	0.0325337	0.0563852	0.0852947	0.0363957	0.0450913	0.0849962	0.0535023	0.048904	0.0794072	0.0961269	3.92748	3.45751	3.05507	2.95412	3.16578	2.71347	2.29444	2.3912	2.18033
17	'M'	67	172	70	Right index finger'	62	97	-6	15	12	-15	-2	-23	7	35	cbtet9qvjtoqui5t4q90.txt	0.501535	0.824351	0.292047	0.156953	0.0802769	0.0493837	0.0401921	0.0286199	0.0186673	0.0109804	0.00934438	0.00739941	0.135128	0.143158	0.26239	0.42386	0.478732	0.609592	0.55947	0.568958	0.749234	0.506819	0.559745	0.712346	4.00433	3.55562	3.14664	2.76573	2.92001	2.68818	2.25537	2.09116	2.19457
7	'M'	53	180	80	Right index finger'	70	96	-17	22	38	2	-20	-1	10	-23	chcbbg4g0t882og8t6kg.txt	0.466218	0.775934	0.378508	0.264106	0.112357	0.0780226	0.0552326	0.0266239	0.010708	0.00622971	0.00403199	0.00269561	0.059387	0.0559571	0.0675275	0.10286	0.140326	0.0927831	0.11357	0.205712	0.21756	0.279534	0.326851	0.425769	4.3016	3.93232	3.07965	2.53249	2.46551	1.78157	1.10438	0.939521	1.16328
16	'M'	43	165	74	Right index finger'	94	99	-7	4	38	-21	-12	-18	-34	-12	ccghvbavjtoo7op4am10.txt	0.521947	0.661655	0.366981	0.203098	0.0920584	0.0617426	0.0263006	0.0142279	0.0106921	0.00775772	0.00463492	0.00341583	0.0506453	0.0729117	0.122468	0.150508	0.135488	0.149363	0.345494	0.444914	0.355595	0.317947	0.531122	0.630855	4.10019	3.75208	2.82964	2.74599	2.09861	1.69603	1.92725	2.01552	1.45376
20	'M'	50	180	100	Right index finger'	94	95	-19	3	100	-43	-58	13	-24	-38	cfhk5l2vjtonbn3ar19g.txt	0.441088	0.676666	0.569015	0.227027	0.0533712	0.0387613	0.0197349	0.00787422	0.00398605	0.00264744	0.00175434	0.00148715	0.0506655	0.0685619	0.124281	0.165169	0.174251	0.162568	0.254868	0.368843	0.390785	0.439285	0.459692	0.46549	4.15674	3.49233	2.13778	1.79755	1.51926	1.2029	1.80332	3.50845	3.51939
19	'M'	71	171	75	Right index finger'	54	93	7	2	-10	4	24	-19	-17	34	cdavl3n2hadc1gjsn0c0.txt	0.602186	0.624721	0.256462	0.18616	0.118769	0.0699495	0.0403851	0.0333982	0.0272637	0.0182731	0.0119939	0.00880159	0.0726963	0.0971886	0.136129	0.0992165	0.205636	0.189346	0.144512	0.237717	0.291699	0.433848	0.464465	0.51204	4.04217	3.88016	3.62867	3.06926	2.70275	2.61075	2.53228	2.1671	1.86355
26	'M'	69	170	74	Right index finger'	70	93	-18	29	65	-30	0	25	17	13	cgn2eqcg0t8edo0cj300.txt	0.476078	0.769668	0.41003	0.192331	0.107813	0.0931062	0.0723728	0.0525374	0.0427486	0.0373463	0.030927	0.0248494	0.015788	0.0179632	0.0209804	0.115697	0.0512735	0.0206817	0.0973755	0.0909027	0.0362865	0.0530007	0.0907879	0.191949	4.52672	3.95147	3.39061	3.34066	3.21262	2.85796	2.56443	2.41353	2.1718
3	'M'	71	178	70	Right index finger'	63	95	-1	12	3	-37	-24	27	25	-12	cg3f2ocg0t8d04b77dg0.txt	0.54612	0.723387	0.281627	0.119727	0.0487488	0.0434847	0.0362497	0.0203006	0.0120796	0.0107194	0.00766093	0.004798	0.0189041	0.0295084	0.0244114	0.0777833	0.136063	0.0813619	0.0746392	0.148701	0.138791	0.0770812	0.130287	0.209803	4.00209	3.46616	2.9207	2.82505	3.01291	2.54733	2.18799	2.21321	2.02149
6	'M'	53	170	80	Right index finger'	61	98	-15	28	21	-31	-47	-34	100	-8	cggla6kg0t8edo0am8b0.txt	0.450443	0.860641	0.354296	0.172035	0.0479632	0.024191	0.0336424	0.0197993	0.00689205	0.00619443	0.00565583	0.00385653	0.0483814	0.078989	0.091059	0.115542	0.27087	0.403948	0.181402	0.208765	0.499643	0.288368	0.345856	0.485942	4.11432	3.29671	2.42171	1.8335	3.40005	2.44107	1.90124	2.24167	2.39139
8	'M'	59	175	65	Right index finger'	72	95	4	9	-8	7	-18	-14	39	-15	cfh1g2ivjtonbn3an2h0.txt	0.583157	0.715675	0.247383	0.182925	0.0814802	0.047979	0.0441629	0.0240826	0.00854662	0.00753652	0.0051278	0.00275548	0.0140819	0.0234923	0.0188955	0.0596879	0.0698568	0.0479543	0.0431408	0.0763609	0.144982	0.163657	0.158295	0.294614	4.00951	3.58263	3.2562	2.61054	2.86765	2.24236	1.51186	1.52588	1.7205
2	'M'	66	173	68	Right index finger'	68	93	-6	20	0	-9	-50	-3	60	-10	cdav8s72hadc1gjsms5g.txt	0.515493	0.779777	0.278252	0.170732	0.0451032	0.0298917	0.0319138	0.0186965	0.00567789	0.00563552	0.00465454	0.00250633	0.0394274	0.0476375	0.0834539	0.064661	0.193259	0.102034	0.0944614	0.0827027	0.30705	0.262828	0.150833	0.384286	4.02831	3.4251	2.769	2.1425	3.07546	2.34945	1.55772	1.41697	1.98457
11	'M'	60	172	73	Right index finger'	84	96	-39	47	100	-12	-19	-23	-9	43	cfu9auivjtonbn3d3thg.txt	0.33511	0.969932	0.672265	0.401981	0.182227	0.0925905	0.055234	0.0519025	0.0394142	0.0236157	0.012906	0.0086734	0.0275207	0.0193818	0.0117678	0.058544	0.10919	0.0980739	0.0906944	0.0796087	0.0583605	0.118404	0.104668	0.206819	4.6906	4.01766	3.08215	2.41793	1.98385	1.93742	1.65394	1.03609	0.4322
38	'M'	72	160	80	Right index finger'	54	96	-8	24	10	-17	-24	-6	61	10	cc3d3qv2hadcsjhi2d5g.txt	0.508951	0.789756	0.307771	0.170331	0.0684898	0.0426794	0.0467503	0.0336535	0.0203635	0.0171347	0.0136288	0.0103164	0.0595902	0.0932586	0.0760402	0.0644525	0.107809	0.138547	0.089786	0.0566618	0.105634	0.100237	0.117125	0.147986	4.18997	3.71554	3.14686	2.75127	3.09089	2.78199	2.33073	2.1464	2.05989
14	'M'	83	170	75	Right index finger'	61	98	5	8	-19	-19	-18	40	27	-15	cdav7l72hadc1gjsmrt0.txt	0.580599	0.710797	0.217205	0.116293	0.0474126	0.0486074	0.0409272	0.0216593	0.0144557	0.0151804	0.0103103	0.00602579	0.00901158	0.015871	0.0241236	0.0277564	0.0706354	0.0426055	0.0459607	0.0673132	0.053371	0.0448308	0.060836	0.0767467	3.90991	3.45063	3.09071	3.0516	3.20415	2.69867	2.2818	2.50301	2.23519
0	'M'	68	171	71	Right index finger'	69	97	0	16	-5	-42	-34	9	-19	-37	cgvs2a72had61ag64ld0.txt	0.558631	0.750488	0.262169	0.100257	0.0360007	0.0269198	0.0136268	0.00548128	0.00330401	0.00222296	0.0012444	0.000947467	0.0120976	0.0201961	0.0201546	0.0613346	0.0673718	0.0752277	0.167114	0.246356	0.263279	0.281966	0.354774	0.296442	3.79253	3.23375	2.48961	2.63074	2.46409	1.94449	1.7263	1.98673	2.13216
15	'M'	71	167	66	Right index finger'	78	97	-1	15	-6	-50	53	18	-53	57	cfe92hqvjtonbn3a6790.txt	0.552536	0.734058	0.261242	0.0846667	0.0796365	0.0583083	0.0174833	0.0200928	0.011407	0.00641991	0.00477699	0.00309235	0.0136553	0.0235213	0.0548301	0.0919087	0.129297	0.0818163	0.15255	0.131577	0.145988	0.218533	0.217276	0.231568	3.92238	3.37497	2.70716	3.35174	2.51371	2.15773	2.39761	1.78873	1.98356
0	'M'	55	172	80	Right index finger'	82	96	-9	30	2	-28	-53	57	-2	-51	cfe919ivjtonbn3a66n0.txt	0.501979	0.847707	0.285088	0.145696	0.0331641	0.0385342	0.025674	0.00709161	0.00708282	0.00772167	0.00393134	0.00246869	0.0290081	0.035194	0.0405861	0.0750153	0.131863	0.0993749	0.133364	0.270579	0.252633	0.182994	0.404561	0.4235	4.03976	3.30908	2.61823	2.60102	2.58811	1.81628	1.65429	2.18151	1.35075
14	'M'	66	170	70	Right index finger'	49	96	1	5	-1	-30	-12	-40	47	63	cghvm3f2had620d48rf0.txt	0.5495	0.739079	0.252387	0.120939	0.0553668	0.0212296	0.0224931	0.0235115	0.0170485	0.0106316	0.00980325	0.00975423	0.116876	0.182605	0.392592	0.343277	0.415872	0.305262	0.350615	0.408155	0.414209	0.41599	0.423899	0.439519	3.89011	3.36902	3.02823	2.61313	2.80593	3.10551	2.70795	2.35684	2.28743
4	'M'	64	163	66	Right index finger'	55	95	-5	19	-2	-25	-33	48	56	-17	chi9oa72had9fa0j6h30.txt	0.527988	0.763111	0.267863	0.138436	0.0536702	0.047111	0.0529076	0.0313528	0.0133766	0.014333	0.0112455	0.00597655	0.0226864	0.0252384	0.0402661	0.0328646	0.0545427	0.0448908	0.0236664	0.0546337	0.0684467	0.0389311	0.0551515	0.0824756	4.09217	3.5028	3.12717	2.8274	3.23756	2.68973	2.03262	2.07853	2.11855
4	'M'	61	170	170	Right index finger'	73	96	1	11	-4	-11	-34	5	38	-18	cg3fc7v2had4qgopfml0.txt	0.562439	0.670043	0.294809	0.167512	0.0737945	0.0492236	0.0529503	0.023966	0.0129446	0.00768625	0.00764453	0.00382507	0.0332405	0.230523	0.301273	0.213674	0.621847	0.204203	0.530348	0.131388	0.914904	0.288265	1.07861	0.336991	4.03227	3.59343	3.11801	2.82967	3.02854	2.2029	1.57309	1.6839	1.6004
22.5	'M'	55	177	66	Right index finger'	94	91	-4	14	20	-62	-2	-8	-43	-18	cgchp3kg0t8d04b8gsf0.txt	0.540141	0.732632	0.321594	0.0899623	0.0425286	0.0305468	0.0108067	0.00561948	0.00392698	0.00223731	0.00109571	0.00111398	0.0136233	0.0316974	0.0425451	0.120397	0.0891646	0.0736499	0.17148	0.196784	0.230908	0.381788	0.462248	0.459851	3.84815	3.22015	2.44585	2.76869	2.12261	1.65106	1.76509	1.51027	1.45402
6	'M'	65	162	75	Right index finger'	54	97	-9	20	10	-31	-22	-18	35	53	chmt8vf2had5ptrsf8i0.txt	0.516506	0.772333	0.274932	0.114187	0.0575415	0.0360448	0.030782	0.0266117	0.0190661	0.0119027	0.0072252	0.00558415	0.101689	0.209036	0.244941	0.431745	0.417052	0.467059	0.390851	0.437411	0.516203	0.671915	0.6134	0.655328	3.88249	3.4137	2.98334	2.83567	2.92629	2.92035	2.52989	2.17642	1.95969
8	'M'	64	173	75	Right index finger'	54	91	0	16	-3	-23	-14	-49	-8	53	cg3f1c4g0t8d04b77d60.txt	0.553933	0.749142	0.267582	0.141847	0.0668907	0.0241134	0.0135505	0.0138521	0.0095962	0.00463157	0.00269364	0.0023869	0.0261561	0.0297496	0.0299202	0.0245379	0.0563662	0.101982	0.0877477	0.0614258	0.0950685	0.2061	0.233936	0.286962	3.95013	3.37854	2.89693	2.29709	2.15034	2.63338	2.41069	1.90081	1.61463
33	'M'	70	170	85	Right index finger'	80	90	-8	14	22	-30	-63	63	28	-34	cfs85iqvjtonbn3cqda0.txt	0.51634	0.731033	0.331246	0.162131	0.0329203	0.0349367	0.0300683	0.0134446	0.00735866	0.00632342	0.00453235	0.00257856	0.0158726	0.0236755	0.0434876	0.0521446	0.122191	0.0547052	0.0669731	0.128165	0.112926	0.105875	0.163466	0.193295	4.00466	3.4989	2.63261	2.52463	2.89837	2.12215	1.64667	1.92396	1.71967
0	'M'	68	155	62	Right index finger'	65	92	-6	20	11	-27	-30	-31	49	-34	cfe8ukavjtonbn3a6600.txt	0.512661	0.787207	0.320363	0.152202	0.0651843	0.0328175	0.0260871	0.0171879	0.00980883	0.00581324	0.00632811	0.00428979	0.117872	0.223584	0.394604	0.285521	0.522305	0.89421	0.439398	0.943292	1.02365	0.883546	1.11614	0.890473	4.00648	3.44235	2.74822	2.16437	2.71379	2.25857	1.64889	1.68689	2.03942
0	'M'	41	182	90	Right index finger'	76	98	-17	7	25	36	-14	-18	3	-23	cdg7onv2hadc1gjtdmc0.txt	0.461739	0.704509	0.328299	0.323426	0.152571	0.0869497	0.0617576	0.0307472	0.0160892	0.00962041	0.00704885	0.00514355	0.0500574	0.0610717	0.107244	0.0841647	0.108045	0.0953324	0.140916	0.208333	0.196545	0.245147	0.317371	0.423144	4.27197	4.1486	3.38376	2.69857	2.57601	2.05314	1.47493	1.2876	1.47211
29.5	'M'	54	168	90	Right index finger'	65	92	-20	22	35	18	-1	-28	46	16	cgn1vr4g0t8edo0citv0.txt	0.443908	0.774431	0.366068	0.310205	0.171549	0.0856549	0.0848222	0.0651245	0.0344334	0.0191042	0.0174005	0.0134578	0.0347259	0.041113	0.0514052	0.0414318	0.0572755	0.0342008	0.0362915	0.0475431	0.0754334	0.0975027	0.0933953	0.104676	4.47776	4.10964	3.60324	2.85736	2.92233	2.68637	2.03186	1.50967	1.5782
0	'M'	59	182	75	Right index finger'	66	96	-1	16	-6	-18	-34	34	41	-31	cg0r8gavjtonbn3dg6v0.txt	0.546462	0.757422	0.253441	0.138376	0.0493229	0.0459369	0.0431646	0.0199824	0.00530686	0.00727555	0.00510929	0.00236881	0.0156849	0.0232825	0.0323224	0.0615671	0.12489	0.0602734	0.0412117	0.134027	0.264714	0.18034	0.100267	0.23484	3.97414	3.36755	3.05944	2.59995	2.9572	2.13796	1.26131	1.41644	1.66751
23	'M'	60	178	80	Right index finger'	76	97	-6	12	13	32	-47	-44	100	3	cg1b67kg0t8d04b6ut8g.txt	0.534611	0.724495	0.285435	0.269187	0.0830408	0.0286384	0.0411918	0.0290356	0.0124989	0.00588712	0.00575279	0.00452951	0.0424847	0.0625544	0.07496	0.103416	0.0948737	0.1457	0.155148	0.108105	0.175451	0.27742	0.241051	0.251114	4.02522	3.92322	3.16645	2.22663	2.28974	2.13689	1.33617	0.621453	0.94784
31	'M'	63	175	65	Right index finger'	68	95	-20	16	36	28	-9	-40	28	19	cgchmt2vjtopa61rsqsg.txt	0.437547	0.748624	0.371535	0.333001	0.174401	0.0710762	0.0542263	0.0441109	0.0257586	0.0133453	0.00738473	0.00650559	0.0284549	0.0518008	0.0371131	0.0303569	0.044917	0.0627224	0.068116	0.0978221	0.137697	0.182088	0.185172	0.194662	4.40883	4.06761	3.41538	2.61281	2.3245	2.42607	1.94248	1.31861	1.13191
7	'M'	43	175	95	Right index finger'	81	97	-5	10	20	-2	-43	57	12	-48	cgqit0f2had7n67r8k2g.txt	0.518982	0.720052	0.340728	0.233207	0.0713636	0.0755596	0.0533221	0.0179036	0.00809267	0.00615084	0.00339407	0.00282316	0.0495207	0.0420685	0.0671959	0.117961	0.205344	0.108238	0.102244	0.183186	0.330051	0.478696	0.496702	0.575374	4.13183	3.70342	3.00474	2.61596	2.54282	1.56953	0.851906	1.11014	0.763937
13	'M'	62	176	60	Right index finger'	64	94	1	17	-11	-37	-42	3	0	-29	cg1b7ev2had4qgop50b0.txt	0.566389	0.757291	0.240242	0.102977	0.0319983	0.023577	0.0151739	0.00657184	0.00374598	0.00313027	0.00174273	0.000985446	0.0316708	0.0193394	0.0520484	0.0583799	0.0923673	0.105239	0.112272	0.117448	0.170394	0.227667	0.269116	0.267335	3.77267	3.20947	2.5509	2.46953	2.67785	2.2809	1.98424	2.2601	2.22686
0	'M'	58	175	70	Right index finger'	73	95	-14	37	25	-43	-35	-35	-7	13	cfg9h54g0t8desl62e70.txt	0.463241	0.909916	0.357776	0.141582	0.0497941	0.0226168	0.0143962	0.00977923	0.00748213	0.00545738	0.00414115	0.00330603	0.017078	0.0175943	0.02878	0.0357982	0.0927768	0.15218	0.170004	0.124938	0.148502	0.223402	0.143388	0.180228	3.99988	2.99783	2.09626	1.47259	1.07147	0.799923	5.72132	4.789	4.08799
0	'M'	70	170	80	Right index finger'	79	87	-8	19	21	-46	-44	27	-2	-34	cfg9ftcg0t8desl62e40.txt	0.5098	0.767604	0.330871	0.128186	0.03934	0.0303682	0.0218754	0.00955073	0.0062118	0.00508484	0.00320751	0.00197863	0.0108118	0.0155843	0.0235109	0.0466715	0.0797339	0.0807476	0.0693006	0.121116	0.115662	0.114618	0.135181	0.255277	4.0257	3.2864	2.61741	2.40496	2.58903	2.26192	1.95955	2.01537	1.8615
0	'M'	65	173	71	Right index finger'	63	96	-10	21	19	-24	0	-10	72	16	cdgcnmcg0t8bqalc5dg0.txt	0.498898	0.787119	0.330231	0.173603	0.0919257	0.0594623	0.0671853	0.0494453	0.0248684	0.0166198	0.0149068	0.0119525	0.0328978	0.0705236	0.0495943	0.0526109	0.127004	0.150762	0.102005	0.109293	0.310308	0.212072	0.361318	0.310659	4.2776	3.70072	3.28707	2.90831	3.19295	2.76401	1.96125	1.4347	1.90733
23	'M'	70	178	72	Right index finger'	60	95	-1	13	0	-25	-20	-17	48	10	cddj28cg0t8bqalbrpeg.txt	0.546501	0.740227	0.278548	0.141531	0.0673729	0.0338059	0.0342959	0.0241642	0.0114465	0.0083708	0.00804317	0.0049349	0.0222784	0.0420401	0.0293755	0.0344013	0.0788113	0.0994473	0.174961	0.191383	0.386974	0.355912	0.330114	0.391679	4.03698	3.50096	3.06012	2.56563	2.7506	2.67581	2.07834	1.78503	1.88099
0	'M'	73	162	68	Right index finger'	77	95	5	14	-14	-29	-26	-25	9	0	cddi0cn2hadc1gjt282g.txt	0.614891	0.677438	0.230584	0.121429	0.0497565	0.0282863	0.0201458	0.0120334	0.00593774	0.00361793	0.00291468	0.002443	0.035763	0.155863	0.110004	0.166361	0.370751	0.444702	0.479175	0.655126	0.476627	0.857747	0.69758	1.14129	3.73354	3.31081	2.91052	2.62463	2.6425	2.3453	2.3944	2.15276	2.11729
20	'M'	66	168	70	Right index finger'	66	93	1	18	-18	-48	-55	26	25	-12	cg8nltv2had4qgoqabf0.txt	0.570598	0.767086	0.227344	0.0815544	0.0178962	0.0174465	0.0141751	0.00742529	0.00508179	0.00388848	0.00301994	0.00230039	0.0176723	0.0199505	0.0371331	0.0449052	0.172351	0.151069	0.23724	0.295632	0.381286	0.354522	0.503338	0.435482	3.68927	3.05254	2.51512	2.40202	3.1437	2.56735	2.24726	2.04799	2.32935
7	'M'	70	170	82	Right index finger'	60	93	9	12	-23	-21	-14	-30	31	9	cgptj4v2had7n67qvbqg.txt	0.60446	0.731953	0.211751	0.109501	0.0513677	0.0253646	0.0223684	0.0160126	0.00755182	0.00397857	0.00380581	0.0026903	0.0176824	0.0235466	0.0299984	0.034132	0.0708983	0.0449872	0.080872	0.0688191	0.0955544	0.118486	0.219409	0.244043	3.78997	3.33042	3.05395	2.61869	2.71795	2.61443	2.14585	1.764	1.99449
10	'M'	70	167	68	Right index finger'	63	95	-2	14	6	-33	-21	40	12	-20	cgijb8sg0t8edo0bbopg.txt	0.553598	0.727632	0.279679	0.125854	0.0558944	0.0545233	0.0396328	0.0213094	0.0162701	0.0133342	0.00906685	0.00594251	0.0141493	0.0194376	0.0306561	0.0611815	0.0429082	0.0419775	0.0681013	0.0870104	0.0501113	0.0583463	0.0795433	0.0918188	4.02324	3.59252	2.99466	3.07426	2.96769	2.46856	2.2441	2.18295	1.87792
26	'M'	56	170	80	Right index finger'	64	96	-4	15	5	1	-20	-17	55	16	cg1b95cg0t8d04b6utsg.txt	0.54705	0.713011	0.277677	0.194732	0.0882449	0.0511164	0.0504564	0.0371331	0.0204461	0.0121598	0.010369	0.00786141	0.0428029	0.0651246	0.0865745	0.100286	0.105252	0.219231	0.198149	0.0890855	0.150428	0.368063	0.25105	0.198333	4.1443	3.73436	3.27601	2.72276	2.89094	2.76158	2.22481	1.76089	1.81649
0	'M'	72	160	80	Right index finger'	81	97	-14	19	52	-30	-14	10	-11	-3	cbaaofivjtoh3rj054q0.txt	0.486971	0.750988	0.401552	0.191705	0.0890581	0.0667849	0.0382845	0.0239545	0.0179387	0.0126132	0.00904811	0.0064875	0.0299034	0.039623	0.0417502	0.0945151	0.0546276	0.0441812	0.0780995	0.103738	0.0665885	0.0899373	0.141177	0.15566	4.28562	3.7415	2.94207	2.85815	2.57922	2.19169	2.08182	1.8573	1.64511
17	'M'	55	173	100	Right index finger'	66	99	0	13	-12	-41	-67	100	-1	-24	cb8id0qvjtoh3rj027s0.txt	0.554187	0.740296	0.241414	0.0995032	0.0196393	0.0340952	0.0174194	0.0104272	0.00961329	0.0092406	0.00701848	0.00833142	0.0315008	0.0427192	0.04383	0.102184	0.523684	0.311998	0.316946	0.446016	0.425489	0.63067	0.569653	0.460709	3.7382	3.07106	2.36027	3.13481	3.15233	2.43136	1.97831	2.806	2.89384
17	'M'	67	170	75	Right index finger'	71	97	-18	32	46	-23	-26	-10	28	-9	cfushjn2haddiqs1qn20.txt	0.457649	0.851283	0.398352	0.20428	0.0785941	0.0550374	0.0446273	0.0247738	0.0140536	0.00951793	0.00640382	0.00410072	0.0335054	0.0358045	0.0433158	0.168813	0.222104	0.153544	0.130218	0.281496	0.177939	0.199792	0.23863	0.297114	4.32687	3.63562	2.88395	2.48131	2.64317	2.12399	1.61983	1.42797	1.33574
0	'M'	50	180	100	Right index finger'	79	94	-8	10	39	-33	-28	10	-14	-20	cbaar672hadbnne30fj0.txt	0.510264	0.7125	0.386809	0.179887	0.0698321	0.0536057	0.0306375	0.0154278	0.00934513	0.0062372	0.00380749	0.00222691	0.0179237	0.019916	0.0349645	0.0735063	0.0446278	0.0539841	0.115491	0.134618	0.137086	0.182677	0.205393	0.368431	4.13725	3.62371	2.70925	2.75754	2.34278	1.80448	1.75712	1.70794	1.61737
3	'M'	68	173	70	Right index finger'	91	95	-1	17	8	-54	32	-17	-49	48	cfu9mnavjtonbn3d40qg.txt	0.546348	0.752739	0.301177	0.100776	0.0684067	0.0392637	0.0141307	0.0125512	0.00679685	0.00438734	0.00341346	0.00186334	0.0217248	0.0894535	0.0438401	0.24648	0.249306	0.210786	0.594366	0.295971	0.782013	0.986004	0.863456	0.922861	3.93866	3.2458	2.76132	2.77734	1.96959	2.18262	1.95461	1.32952	1.65158
16	'M'	67	173	75	Right index finger'	66	95	-6	16	2	-20	-20	-2	87	65	cgqijp72had7n67r8e80.txt	0.508399	0.767777	0.282121	0.147108	0.0640503	0.0528123	0.0547457	0.0507713	0.0203282	0.0154821	0.0122067	0.00906508	0.0428918	0.0599146	0.188518	0.192654	0.397351	0.362927	0.515481	0.731877	0.802654	0.493469	0.669774	1.12341	4.05647	3.32298	2.70896	2.0058	2.86479	2.2846	3.08958	3.13383	2.57543
0	'M'	69	164	75	Right index finger'	59	95	-1	12	0	-18	-18	7	32	-9	cbfkvpsg0t87cj2o810g.txt	0.543792	0.727757	0.275115	0.155443	0.068117	0.0508602	0.0444905	0.025821	0.0134214	0.0121412	0.00942036	0.00596372	0.0108694	0.0184548	0.0156015	0.023129	0.031517	0.0418119	0.0241228	0.0362455	0.0669565	0.0685346	0.0667185	0.104596	4.09898	3.55471	3.08082	2.7519	3.0307	2.56614	2.04792	2.01335	2.05409
47	'M'	42	185	110	Right index finger'	68	94	-9	7	37	-5	-52	35	-3	-33	cg7dfq4g0t8d04b7muk0.txt	0.513435	0.691456	0.360473	0.242817	0.0692508	0.0602394	0.0375776	0.0169023	0.0104158	0.00629191	0.00425208	0.00286874	0.0662939	0.0854314	0.137024	0.13702	0.367561	0.0835939	0.184446	0.149783	0.170317	0.179962	0.286739	0.30167	4.12953	3.88017	2.82895	2.49782	2.67526	1.96638	1.72814	1.73956	1.5788
0	'M'	67	173	75	Right index finger'	70	96	0	14	2	-27	-36	-9	3	-24	cgptma72had7n67qvdlg.txt	0.556187	0.749077	0.272985	0.13093	0.042568	0.0278597	0.0181516	0.00826134	0.00307214	0.00236263	0.00228267	0.00126139	0.0615446	0.0798518	0.129168	0.177616	0.124802	0.257957	0.354835	0.406737	0.316489	0.266367	0.29811	0.407827	3.85665	3.32937	2.68076	2.34464	2.5153	2.00796	1.54919	1.93998	2.28942
2	'M'	45	180	86	Right index finger'	79	93	-7	8	34	-9	-10	-1	-16	-28	chcavmcg0t87qvpjlch0.txt	0.5054	0.773084	0.331706	0.189842	0.0959096	0.0663685	0.0384945	0.0174019	0.0111032	0.00699657	0.00450466	0.00275515	0.142152	0.185482	0.416093	0.50756	0.495759	0.523887	0.617118	0.616279	0.694644	0.68829	0.775363	0.862082	4.19541	3.85841	3.10946	2.77234	2.38834	1.67309	1.32911	1.47492	1.50668
20	'M'	56	183	75	Right index finger'	69	95	-5	5	42	-56	20	-3	-20	-9	cgiibb72had620d4fs2g.txt	0.53227	0.67827	0.383573	0.113895	0.0763123	0.0494126	0.0253853	0.0148486	0.00876891	0.00545859	0.00307974	0.00194108	0.0163263	0.0407971	0.0188641	0.130992	0.121594	0.108898	0.0684694	0.118328	0.100967	0.176005	0.178181	0.249718	4.07083	3.46901	2.66645	3.03402	2.41906	2.18318	1.95896	1.82779	1.55505
17	'M'	61	175	85	Right index finger'	64	91	-16	34	32	-25	-25	-40	-20	-3	chgvlcf2had9fa0ip430.txt	0.454763	0.906522	0.359848	0.191359	0.080356	0.0316896	0.0185068	0.0118562	0.00845338	0.00557131	0.00425146	0.0031731	0.102525	0.107923	0.203136	0.2236	0.261864	0.196137	0.267756	0.270097	0.295405	0.267874	0.300721	0.268389	4.13776	3.30515	2.47855	1.64247	1.16218	0.984593	1.32616	3.66389	4.6469
10	'M'	64	165	64	Right index finger'	66	90	-5	17	15	-20	-24	25	19	-14	ch526ov2had61ag8b53g.txt	0.529023	0.748565	0.312201	0.172372	0.0708707	0.0619415	0.0487696	0.0271229	0.0159888	0.0126252	0.00888487	0.00615135	0.0230857	0.0353031	0.0326394	0.0396224	0.0555129	0.0360268	0.0507797	0.09497	0.0911927	0.0916726	0.133707	0.183864	4.17288	3.70085	3.07388	2.89833	2.92954	2.40454	1.93762	1.92084	1.79968
21.5	'M'	76	167	64	Right index finger'	76	95	-3	17	4	-37	-43	0	16	-18	cbktgg2vjtoh3rj0sok0.txt	0.536404	0.758139	0.283994	0.122898	0.0370231	0.0252974	0.0198741	0.010114	0.0055544	0.00553227	0.00384188	0.00235973	0.0190605	0.0269522	0.0336195	0.0482339	0.1064	0.131903	0.119534	0.221652	0.271763	0.215052	0.341777	0.428649	3.92686	3.32043	2.63039	2.41137	2.70308	2.32946	1.97445	2.13234	2.16756
13	'M'	48	170	71	Right index finger'	70	96	-9	24	14	-21	-41	19	41	-24	cg8nqssg0t8d04b7s2d0.txt	0.506091	0.794658	0.312935	0.171227	0.0554211	0.0439364	0.0413629	0.0206721	0.00782285	0.00652641	0.00471356	0.00204829	0.0191689	0.0262227	0.0371269	0.0725803	0.163669	0.108863	0.0649486	0.182946	0.224342	0.228599	0.287367	0.569478	4.10446	3.48946	2.86093	2.43835	2.81967	2.09796	1.31713	1.41745	1.50976
19	'M'	53	178	82	Right index finger'	105	94	-27	31	100	-46	3	-6	-29	-13	cgn1t6sg0t8edo0cit20.txt	0.412564	0.854177	0.556791	0.199443	0.120725	0.0746507	0.0333753	0.0193498	0.0103711	0.00616489	0.0034955	0.00236249	0.0425454	0.0517272	0.0671943	0.147895	0.182914	0.162354	0.235394	0.254949	0.373307	0.448699	0.437408	0.520379	4.44441	3.47757	2.61846	2.39928	1.71697	1.07098	1.18982	1.60069	3.31224
18	'M'	68	176	75	Right index finger'	60	98	1	9	2	-13	2	-10	21	2	cg7d984g0t8d04b7mt9g.txt	0.550705	0.722053	0.287597	0.189398	0.114708	0.0633155	0.0486796	0.0352519	0.0197194	0.0124791	0.00951503	0.00580696	0.0674845	0.125584	0.120085	0.111635	0.181488	0.206474	0.18893	0.227719	0.269017	0.274775	0.223852	0.359688	4.16051	3.67982	3.31675	2.79751	3.0043	2.53174	2.29361	1.93928	1.76203
19	'M'	70	165	63	Right index finger'	55	94	-6	19	2	-4	-11	-41	0	32	cghvd0v2had620d48kjg.txt	0.528963	0.760159	0.2827	0.184934	0.0872584	0.0335647	0.0233278	0.0200572	0.0137471	0.00749476	0.00448258	0.00389721	0.0393318	0.0434993	0.0481036	0.0620445	0.0778169	0.1643	0.101396	0.0870002	0.106254	0.203648	0.189636	0.150708	4.08594	3.62723	3.06496	2.40497	2.25527	2.51619	2.21836	1.72843	1.42838
16	'M'	58	170	75	Right index finger'	60	98	-1	13	0	-12	-22	-18	42	-3	cgj8u1n2had620d4pg9g.txt	0.551392	0.718139	0.270546	0.162101	0.0669931	0.0379064	0.0372602	0.0221383	0.0102842	0.00687299	0.00601526	0.00422908	0.0218696	0.0422514	0.0351856	0.0603275	0.067567	0.0776771	0.0652491	0.0680803	0.123415	0.119506	0.131379	0.113827	4.03615	3.51736	3.07783	2.50281	2.81795	2.57693	2.03394	1.83164	2.07249
2	'M'	57	170	71	Right index finger'	59	95	0	11	0	-10	-24	5	37	-7	cgvrllcg0t889ug8sa70.txt	0.556832	0.713973	0.272551	0.167038	0.0680419	0.0507014	0.0452618	0.0267163	0.0142028	0.0115014	0.00853576	0.00473098	0.0341557	0.0502596	0.0499436	0.0492318	0.0678589	0.0813829	0.0532025	0.13918	0.0665341	0.124197	0.122784	0.248659	4.06567	3.65299	3.10828	2.7791	3.02586	2.55932	1.99449	1.91187	1.94891
0	'M'	55	170	95	Right index finger'	61	95	-3	18	-1	-18	-31	-52	100	3	cg06hcqvjtonbn3dcp8g.txt	0.522217	0.763965	0.293596	0.174808	0.0641714	0.0237853	0.0311639	0.0201118	0.00850032	0.00426573	0.00335463	0.0024123	0.0382404	0.0592287	0.0415229	0.0761931	0.143345	0.246841	0.122054	0.185142	0.34529	0.491884	0.455655	0.463778	4.04246	3.46904	2.93253	2.21436	2.68386	2.45546	1.65328	1.16733	1.55504
20	'M'	68	176	80	Right index finger'	66	95	0	6	7	-14	-24	17	19	-6	cgvrb0kg0t889ug8s910.txt	0.560411	0.667716	0.287722	0.175517	0.0712305	0.0546743	0.0432632	0.0253531	0.0200138	0.0180416	0.0139023	0.0110523	0.015187	0.0241697	0.0135999	0.0380888	0.0259182	0.0458994	0.0544437	0.0517485	0.0555905	0.0439045	0.0450319	0.061561	4.13002	3.72953	3.12442	2.99234	3.10331	2.70264	2.46427	2.46999	2.18774
2	'M'	61	175	72	Right index finger'	66	91	0	14	-13	-18	-52	43	41	-31	chhjksf2had9fa0ivfm0.txt	0.565514	0.736587	0.232968	0.129407	0.0330153	0.0343279	0.0320855	0.0140644	0.00547094	0.00753864	0.00548992	0.00227505	0.0282288	0.0278908	0.0366631	0.0329486	0.115386	0.0813557	0.049861	0.175689	0.295862	0.215933	0.256968	0.364762	3.84451	3.36938	2.8338	2.55734	3.11206	2.28503	1.57913	2.4464	2.16299
3	'M'	44	178	78	Right index finger'	63	94	-7	9	27	-6	-29	1	24	-21	cg2m1r4g0t8d04b745v0.txt	0.519374	0.701647	0.346241	0.22091	0.0871418	0.0607793	0.0502937	0.0252682	0.0112552	0.00857495	0.00618344	0.00412054	0.0273375	0.0350244	0.0681725	0.0722503	0.114156	0.0544049	0.0559216	0.151766	0.271699	0.252893	0.410513	0.329529	4.17808	3.7978	3.01527	2.55721	2.82008	2.23151	1.55886	1.46376	1.52924
14	'M'	55	170	84	Right index finger'	76	91	-12	28	24	-30	-30	-41	-5	10	cg81grcg0t8d04b7p6e0.txt	0.483971	0.827934	0.345386	0.16241	0.0597663	0.0224323	0.0136989	0.00948226	0.00752435	0.0060816	0.00476874	0.00395042	0.0584495	0.0632306	0.0908072	0.100121	0.154022	0.233869	0.390357	0.488965	0.51376	0.43999	0.318507	0.317954	4.0928	3.38039	2.6538	2.13049	2.24814	2.25304	2.32135	2.2323	1.97403
3	'M'	65	162	60	Right index finger'	76	99	1	11	-10	-39	7	47	-31	-12	cgpuf5n2had7n67qvs6g.txt	0.56757	0.718444	0.249488	0.103182	0.0617029	0.0604373	0.0275122	0.0161084	0.0148928	0.0088102	0.00462801	0.00408967	0.019506	0.0280114	0.0637875	0.0995701	0.117967	0.0901923	0.162586	0.124758	0.140579	0.236741	0.384412	0.44903	3.91117	3.47387	2.91593	3.26002	2.77622	2.12547	2.42397	2.12401	1.49487
0	'M'	66	175	80	Right index finger'	75	97	0	22	-25	-57	19	17	-53	-19	cfi6vav2haddiqs0smjg.txt	0.550782	0.793923	0.206064	0.062904	0.0395308	0.0317368	0.0095248	0.00520243	0.00407264	0.0015666	0.000843705	0.000872152	0.0148051	0.0201857	0.0440978	0.110369	0.112093	0.0626476	0.14549	0.243996	0.228502	0.593307	0.55112	0.5231	3.70178	3.03371	2.52661	3.02051	2.32172	1.74745	2.24416	2.02338	2.10127
8	'M'	49	188	88	Right index finger'	74	94	-9	14	28	-4	-29	16	13	-25	cfvglnavjtonbn3d9720.txt	0.501831	0.750248	0.355744	0.233926	0.0855792	0.0756713	0.0557948	0.0246786	0.010835	0.0106666	0.00715848	0.00362652	0.0416562	0.0408558	0.0651473	0.0852592	0.122646	0.145303	0.0887143	0.187828	0.177938	0.121005	0.169637	0.230648	4.25775	3.84186	3.04977	2.77981	2.68326	1.85825	1.29516	1.4604	1.2735
7	'M'	62	170	68	Right index finger'	81	94	-5	20	6	-54	-8	17	-51	24	cgvrugf2had61ag64j9g.txt	0.525808	0.772789	0.294345	0.0938555	0.0457673	0.0369725	0.0120016	0.00922286	0.0073381	0.00306516	0.00226134	0.00175259	0.0143725	0.0272279	0.0234561	0.0776711	0.0564254	0.0448009	0.179082	0.117349	0.117758	0.249612	0.217761	0.307115	3.92397	3.17868	2.48433	3.05854	2.36988	1.79957	2.39414	1.88982	1.6564
17	'M'	60	170	80	Right index finger'	63	96	-12	29	14	-7	-26	-25	59	3	cghvj172had620d48p30.txt	0.489123	0.83144	0.308809	0.197033	0.0751111	0.0407542	0.0421941	0.0277431	0.0139667	0.0133615	0.0118128	0.00845816	0.0228977	0.0391163	0.0300785	0.0203954	0.0516915	0.120295	0.0594135	0.0732741	0.0697464	0.0764932	0.0507247	0.0570728	4.24282	3.63875	3.06732	2.46646	2.94275	2.61627	2.01216	1.9497	2.06532
6	'M'	46	175	78	Right index finger'	83	94	-13	8	32	14	-25	-22	9	-19	chi9s0n2had9fa0j6j0g.txt	0.480041	0.700964	0.364409	0.290664	0.113311	0.0615647	0.0449665	0.0230185	0.00912481	0.00655787	0.00504839	0.00271788	0.0314151	0.0321546	0.0504153	0.0770292	0.0961432	0.0971359	0.0807947	0.150569	0.272635	0.263854	0.199285	0.31692	4.18574	3.99731	3.04533	2.44325	2.39522	1.79214	1.21852	1.10745	1.25983
0	'M'	48	165	62	Right index finger'	59	96	-2	14	2	-26	-23	-12	59	7	cghve8kg0t8edo0b5k60.txt	0.54708	0.726434	0.281952	0.140605	0.0600748	0.0362533	0.0379385	0.0267881	0.0135035	0.00948267	0.00822903	0.00591449	0.02745	0.0449186	0.0303869	0.0483215	0.0618796	0.0421767	0.0270254	0.0570596	0.110107	0.102288	0.109645	0.22889	4.02933	3.55859	3.04827	2.69852	2.93545	2.70658	2.18055	1.91844	1.96244
11	'M'	51	170	85	Right index finger'	77	93	-8	8	39	-21	-25	1	28	-13	cfqo0a72haddiqs1fhag.txt	0.514391	0.713208	0.369814	0.206806	0.0843739	0.0595569	0.0474082	0.0279449	0.0144578	0.0111233	0.00750841	0.00446694	0.107918	0.154752	0.11427	0.195553	0.281817	0.198864	0.227363	0.32175	0.461672	0.434085	0.28629	0.511696	4.14093	3.78286	2.95	2.70126	2.73557	2.24131	1.7541	1.699	1.85153
3	'M'	72	168	67	Right index finger'	65	95	-3	19	0	-33	-29	42	7	-28	cg7dkvf2had4qgoq42m0.txt	0.538597	0.767015	0.277813	0.125498	0.0468212	0.0470997	0.0329406	0.0149749	0.0137168	0.0102749	0.00527143	0.00385129	0.0182649	0.0276883	0.0390234	0.060538	0.119683	0.0601322	0.106751	0.206406	0.098599	0.116055	0.243675	0.202918	4.00258	3.47071	2.80443	2.88366	2.80391	2.21511	2.14538	2.11957	1.60845
3	'M'	60	172	83	Right index finger'	60	97	3	5	0	-20	16	-28	20	19	cgvs3l4g0t889ug8sbo0.txt	0.572871	0.712958	0.265325	0.14383	0.0807889	0.0468037	0.0316567	0.022987	0.015461	0.0101353	0.00685946	0.00511915	0.124042	0.167282	0.190276	0.24444	0.280416	0.25997	0.258497	0.35624	0.377245	0.412688	0.535107	0.586326	3.85478	3.62331	3.29532	2.81664	2.67173	2.61307	2.32835	2.13326	1.96182
3	'M'	77	182	86	Right index finger'	57	93	-15	26	23	-30	-60	49	55	-36	cg0r4eivjtonbn3dg5kg.txt	0.465788	0.820643	0.347371	0.174639	0.0443436	0.0326588	0.0383851	0.0179385	0.00661691	0.0101352	0.0064706	0.00428998	0.0584473	0.0822945	0.109688	0.10867	0.285687	0.334431	0.138794	0.179407	0.448084	0.214022	0.227744	0.300953	4.17829	3.35885	2.65867	2.04277	3.46506	2.44559	1.94941	2.44145	2.27138
9.5	'M'	42	173	85	Right index finger'	88	95	2	5	25	-55	28	-1	-49	20	cgpun3v2had7n67r0130.txt	0.570775	0.677602	0.345399	0.109293	0.0786514	0.0531837	0.0157286	0.0134113	0.00817547	0.00377036	0.00220225	0.00154829	0.00948148	0.0190045	0.0317794	0.0472743	0.0610278	0.058939	0.131286	0.139385	0.138674	0.298764	0.265696	0.458033	3.9593	3.50604	2.75908	2.9325	2.11915	1.80977	2.01493	1.48692	1.53648
13	'M'	59	175	75	Right index finger'	85	97	-10	33	6	-52	-14	30	-47	-32	cgqi69n2had7n67r86lg.txt	0.498634	0.862613	0.294879	0.1006	0.0463016	0.0411008	0.0143769	0.00625225	0.00556338	0.00243306	0.00116463	0.0013355	0.0242716	0.0382926	0.0386885	0.15799	0.157967	0.103779	0.254604	0.340985	0.22473	0.402259	0.517188	0.388289	3.99072	3.154	2.37968	2.88828	2.07191	1.20999	1.73742	1.32212	0.716518
7	'M'	75	170	73	Right index finger'	75	95	-21	20	62	4	-37	-14	5	-24	ch522p4g0t889ug9adv0.txt	0.419987	0.808306	0.457596	0.359133	0.124005	0.0673524	0.0486168	0.0240877	0.0120546	0.00722496	0.00432374	0.00299677	0.0616596	0.0654657	0.152248	0.0843874	0.0881427	0.122021	0.0926139	0.123231	0.228466	0.254549	0.331065	0.364468	4.30811	4.18865	2.89717	2.21892	2.3723	1.82226	1.23805	1.06375	0.954478
15	'M'	66	179	90	Right index finger'	59	94	0	15	0	-35	-24	-32	63	7	cghvn872had620d48sdg.txt	0.535771	0.784246	0.261401	0.106555	0.0472104	0.0322071	0.0251062	0.0161229	0.0102264	0.00772032	0.00650724	0.00500811	0.0861934	0.110669	0.101763	0.268652	0.375977	0.662713	0.230627	0.305271	0.583276	0.435753	0.439957	0.788531	3.88343	3.23987	2.88499	2.43397	2.6494	2.78896	2.34739	2.00551	1.76117
8	'M'	62	175	72	Right index finger'	69	97	-13	15	11	39	-11	-27	29	-4	cfqocdqvjtonbn3ci7v0.txt	0.490701	0.738873	0.296787	0.284813	0.141963	0.0694894	0.0598998	0.0374679	0.0177539	0.0121236	0.00978305	0.00616192	0.0465972	0.0411363	0.0427191	0.124415	0.13067	0.0984816	0.100658	0.106516	0.156543	0.124357	0.159635	0.188556	4.29268	3.95958	3.42245	2.71419	2.63642	2.3718	1.72519	1.39967	1.47653
0	'M'	65	165	80	Right index finger'	79	96	-4	20	6	-12	-37	52	1	-46	cg8nrvf2had4qgoqaegg.txt	0.534699	0.773863	0.2856	0.173796	0.05847	0.059838	0.0420848	0.0144539	0.0100842	0.00943173	0.00492412	0.00278595	0.0109676	0.0164489	0.026228	0.105923	0.0918372	0.0775626	0.0955781	0.252497	0.144938	0.0908457	0.197	0.226458	4.10414	3.53896	2.9944	2.8597	2.73317	1.86136	1.35539	1.93028	1.44793
30.5	'M'	58	180	75	Right index finger'	66	93	0	6	15	-30	-22	30	0	-14	cfqob3ivjtonbn3ci7b0.txt	0.561046	0.684279	0.306075	0.159298	0.0651065	0.0561626	0.0401377	0.0226211	0.0143271	0.010729	0.00730542	0.00487072	0.0172166	0.0224853	0.0374636	0.0513785	0.0690079	0.0364954	0.0663762	0.104902	0.0952947	0.0752991	0.0833251	0.121111	4.04083	3.6994	3.01703	2.8879	2.90917	2.4004	2.04493	1.9083	1.71481
10	'M'	49	170	86	Right index finger'	73	99	-11	26	19	-21	-28	52	35	-22	cbtf14qvjtoqui5t4rdg.txt	0.495997	0.801931	0.322828	0.180003	0.0745374	0.0739925	0.0649482	0.0331486	0.0167314	0.0151315	0.0117265	0.00727973	0.0440306	0.0714502	0.118667	0.126947	0.246016	0.266377	0.281113	0.319516	0.457769	0.40244	0.289797	0.475297	4.20293	3.51924	3.00743	2.86185	2.93484	2.06066	2.01038	2.3894	1.7221
7	'M'	58	172	91	Right index finger'	66	91	-9	14	18	7	-8	-26	23	14	cfus9vqvjtonbn3d6ci0.txt	0.507682	0.733018	0.322717	0.242713	0.118928	0.0594816	0.0492752	0.0371617	0.0210205	0.0111372	0.00858334	0.00733461	0.0229029	0.0321587	0.0369233	0.0282961	0.0700132	0.0412779	0.0461012	0.0629904	0.0971311	0.141854	0.143235	0.156724	4.24799	3.92919	3.2933	2.72707	2.69769	2.48984	1.96928	1.48626	1.44167
0	'M'	73	176	80	Right index finger'	67	95	3	9	-9	-6	-22	-13	38	-3	chcara4g0t87qvpjlad0.txt	0.566645	0.716571	0.2515	0.162801	0.0669806	0.0420732	0.0382806	0.0234243	0.0106846	0.00731336	0.00510621	0.00318982	0.0180768	0.0273952	0.0175418	0.0199775	0.0686048	0.0875718	0.0621426	0.0652384	0.116392	0.0998552	0.135428	0.201385	4.00329	3.55611	3.08849	2.65147	2.97026	2.51524	1.84902	1.64962	1.80421
5	'M'	43	165	74	Right index finger'	81	99	-3	3	10	14	-18	18	-15	-23	cbsqomqvjtoqui5t2crg.txt	0.543671	0.668732	0.300509	0.222802	0.10091	0.0873038	0.045522	0.0228602	0.0151193	0.0120438	0.00798271	0.00478226	0.0368726	0.121519	0.106437	0.134707	0.115231	0.0871791	0.134442	0.177557	0.214384	0.16842	0.170649	0.266436	4.14751	3.82895	3.24069	2.93322	2.76345	2.09804	1.79265	1.8847	1.68251
10	'M'	41	180	100	Right index finger'	82	97	-8	12	44	-23	-45	44	-6	-31	chgvk0n2had9fa0ip360.txt	0.50702	0.715948	0.407769	0.200084	0.0634641	0.0636568	0.0371159	0.0162219	0.00948981	0.00638691	0.00448035	0.00247028	0.0453456	0.0844936	0.0685545	0.101328	0.115607	0.204478	0.182738	0.25578	0.309634	0.245601	0.276498	0.319806	4.11304	3.68878	2.66865	2.67368	2.32641	1.59233	1.11267	1.18873	1.28656
15	'M'	78	170	74	Right index finger'	60	97	0	15	-5	-32	-26	-17	68	0	cg06e672haddiqs1u7lg.txt	0.572046	0.729563	0.250304	0.118218	0.0432823	0.0269073	0.0291883	0.0194736	0.0068658	0.00475296	0.00488822	0.00344704	0.0716426	0.090866	0.0754929	0.107967	0.182758	0.166715	0.113347	0.138376	0.250436	0.387647	0.263983	0.255906	3.87634	3.33868	2.9165	2.53865	3.06302	2.64828	1.96631	1.3589	1.9181
7	'M'	78	163	61	Right index finger'	54	95	-3	17	0	-33	-37	-14	59	-11	cfqod072haddiqs1fk00.txt	0.540209	0.758234	0.271591	0.125832	0.0441389	0.0243573	0.0259645	0.0155452	0.0062279	0.00637979	0.00540732	0.00301206	0.0257507	0.0347415	0.0304769	0.0372392	0.0557926	0.0626431	0.0495797	0.0701633	0.138214	0.0944426	0.0950325	0.104766	3.93874	3.37241	2.74463	2.29864	2.83811	2.54826	2.01779	2.10061	2.32618
0	'M'	43	165	74	Right index finger'	77	96	-7	5	11	21	-17	-7	-4	-30	cdg7nan2hadc1gjtdlrg.txt	0.51145	0.680734	0.308909	0.261848	0.118515	0.0764305	0.0485568	0.0218676	0.0097234	0.00726933	0.00501641	0.00274032	0.0452361	0.0384743	0.102382	0.0659371	0.0780652	0.0727789	0.0976174	0.176027	0.158728	0.142683	0.223565	0.324988	4.14655	4.03513	3.20654	2.68012	2.47039	1.88381	1.47098	1.58592	1.7268
10	'M'	58	174	73	Right index finger'	65	98	3	8	-3	-20	-23	24	5	-23	cghvoj72had620d48tbg.txt	0.576503	0.696368	0.265992	0.146154	0.0595109	0.0503036	0.0350626	0.0172344	0.0123036	0.00996003	0.00665372	0.00428306	0.0104922	0.0128859	0.032788	0.0364739	0.0220603	0.024675	0.0315203	0.0432833	0.061715	0.0726999	0.1006	0.123568	3.98	3.60778	2.97059	2.92173	2.8287	2.34981	2.1377	2.23462	1.9881
14	'M'	42	185	120	Right index finger'	69	96	-22	24	40	25	-30	-39	-1	-21	cfi8i2avjtonbn3avttg.txt	0.453522	0.951033	0.290915	0.266276	0.261125	0.0691088	0.0376859	0.0200159	0.0137131	0.0189992	0.0209569	0.0166489	0.268161	0.562879	0.516659	1.32703	2.98014	0.993698	1.38834	1.0518	1.11335	1.51885	1.51961	1.86926	3.69939	2.8828	2.63497	2.9136	3.29644	3.67636	3.30477	2.7536	3.08655
16	'M'	67	170	80	Right index finger'	65	96	0	10	2	-17	-25	24	25	-13	cg3fdq4g0t8d04b77fs0.txt	0.559678	0.701919	0.283369	0.162983	0.0664177	0.0561114	0.0461342	0.0263238	0.0171017	0.0135307	0.00952786	0.00670628	0.0134981	0.0235995	0.0327602	0.0546556	0.0893695	0.0504057	0.0625728	0.127034	0.0748664	0.104693	0.124855	0.154607	4.07443	3.69336	3.13805	2.9001	3.02427	2.51141	2.05904	2.02522	1.82621
13	'M'	68	165	65	Right index finger'	63	97	0	9	-2	-32	-26	22	40	-12	cg3f07kg0t8d04b77cpg.txt	0.571128	0.678567	0.266821	0.121501	0.052297	0.0424945	0.0405131	0.0234515	0.00983424	0.00780773	0.00656241	0.0042362	0.0603178	0.0774628	0.0830547	0.0868709	0.172234	0.132855	0.0893518	0.123326	0.240619	0.148223	0.156217	0.231819	3.91561	3.42774	3.01561	2.71291	3.2316	2.66138	1.99288	1.76292	2.1069
15	'M'	65	170	70	Right index finger'	62	96	-18	48	45	-3	-13	35	44	9	cg0697qvjtonbn3dcmng.txt	0.455225	0.868598	0.400136	0.243896	0.116453	0.112297	0.105163	0.0731979	0.0536916	0.0481102	0.0415731	0.0331443	0.0574207	0.0451731	0.14883	0.0735195	0.144332	0.11097	0.0965248	0.128642	0.0626772	0.0571672	0.099307	0.263812	4.63836	4.0471	3.60951	3.32883	3.47415	2.99542	2.54822	2.39549	2.20938
4	'M'	58	173	81	Right index finger'	54	92	4	11	-15	-30	-21	-16	60	14	cge0hhv2had620d2g110.txt	0.57817	0.736424	0.230022	0.108458	0.0460428	0.0262992	0.0284784	0.0205665	0.00910149	0.00443625	0.00474153	0.00363946	0.0356477	0.0332558	0.0632192	0.0744959	0.177991	0.107642	0.0814995	0.1248	0.329558	0.179163	0.131363	0.290606	3.82408	3.33049	2.91832	2.52967	3.0887	2.82253	2.11009	1.54845	2.10623
15	'M'	66	170	75	Right index finger'	65	97	10	7	-14	-21	-26	-40	0	0	cb8bh8n2hadbnne2ovs0.txt	0.622403	0.695154	0.232708	0.126439	0.0511357	0.0207764	0.0134525	0.00949388	0.00501596	0.00350884	0.00244357	0.00219932	0.0295609	0.0344987	0.0354129	0.0608956	0.133023	0.16349	0.167381	0.196891	0.246469	0.40159	0.67543	0.335625	3.7156	3.40269	2.84268	2.38234	2.35727	2.49845	2.33116	2.12303	2.04594
13	'M'	52	173	75	Right index finger'	72	99	-2	11	3	6	-23	-11	2	-6	cb8bdnf2hadbnne2ov50.txt	0.535964	0.725713	0.279937	0.22884	0.0986609	0.0558907	0.0394806	0.0238981	0.0140276	0.00867484	0.00564705	0.00386691	0.0371095	0.0822913	0.0905744	0.0871306	0.134271	0.1772	0.141667	0.207757	0.215007	0.375117	0.471778	0.863961	4.13327	3.84642	3.18601	2.59386	2.60976	2.24797	1.77924	1.58948	1.42918
7	'M'	43	165	74	Right index finger'	95	99	-1	4	22	-16	-8	-18	-28	-4	cb8cq5v2hadbnne2p8gg.txt	0.512217	0.808415	0.287999	0.105662	0.0982535	0.0495275	0.0519813	0.0208536	0.0234102	0.00979062	0.0228689	0.00834171	0.15452	0.558407	0.326421	0.670243	0.712793	1.00611	0.833221	1.36105	1.16425	1.33385	1.18206	1.42696	3.35113	3.83826	3.68712	3.29889	2.59103	2.81514	2.86749	2.36167	3.07674
3	'M'	53	160	65	Right index finger'	89	98	2	11	-1	-39	-28	17	-13	-30	chgvbkkg0t88crmjau00.txt	0.570068	0.738042	0.253422	0.106672	0.0432497	0.0328605	0.019357	0.00889234	0.00771755	0.00478164	0.00264475	0.00184373	0.063563	0.10299	0.0942904	0.202191	0.154253	0.171298	0.210918	0.366005	0.269285	0.353936	0.429014	0.426902	3.86557	3.34321	2.69242	2.82053	2.6252	2.03822	1.87944	2.17514	1.74359
14	'M'	68	170	45	Right index finger'	63	96	0	17	-7	-34	-16	-31	62	10	chlhlpv2had5ptrs5jrg.txt	0.547927	0.76817	0.254221	0.114986	0.0510831	0.0239169	0.025823	0.0184129	0.00927248	0.00523214	0.00524488	0.0044166	0.0266247	0.0336301	0.030885	0.028509	0.0908983	0.0657034	0.0651472	0.0690883	0.145703	0.141863	0.120506	0.120608	3.94321	3.31369	2.89206	2.47649	2.9243	2.7078	2.10291	1.66652	1.91631
2	'M'	66	170	60	Right index finger'	71	98	-5	19	-1	-42	-38	58	9	-27	cgglfdkg0t8edo0ambj0.txt	0.524076	0.77735	0.272047	0.106002	0.0286414	0.0339414	0.0246842	0.0106955	0.00982564	0.00951799	0.00540831	0.00373946	0.0362252	0.054651	0.0315096	0.120296	0.258038	0.123346	0.122601	0.289815	0.275368	0.217773	0.294264	0.257673	3.94801	3.21853	2.61325	3.0226	3.13892	2.39272	2.02907	2.35804	1.98396
15	'M'	49	173	81	Right index finger'	81	94	-20	25	64	-17	-20	26	-15	-31	cg3f7hv2had4qgopfkkg.txt	0.498668	0.748002	0.379279	0.21231	0.0923811	0.0743857	0.03993	0.0227051	0.0177306	0.0144104	0.0131003	0.00990945	0.163886	0.257999	0.298401	0.416435	0.336384	0.339205	0.532624	0.636379	0.777254	0.723558	1.07399	1.16281	4.18251	3.71177	2.77858	2.72342	2.53341	1.7337	1.51805	2.26239	1.24547
2	'M'	75	160	75	Right index finger'	70	93	-4	19	-8	-42	-23	76	-20	-21	chc62fv2had61agb7pq0.txt	0.536218	0.762201	0.246926	0.096956	0.0419829	0.0497145	0.0257471	0.0132791	0.014644	0.0100259	0.00583531	0.00494588	0.0154024	0.0313024	0.0352888	0.158335	0.142085	0.0968142	0.244047	0.170209	0.152375	0.205492	0.239019	0.195511	3.94664	3.30403	2.69919	3.23728	2.97855	2.3262	2.72797	2.40756	1.83145
13	'M'	50	170	85	Right index finger'	67	91	-6	18	5	-28	-39	11	58	-23	cg06iv72haddiqs1u8lg.txt	0.508102	0.772591	0.307228	0.158018	0.0546265	0.0336931	0.0397308	0.0206377	0.006002	0.00717173	0.00474127	0.00211523	0.0250369	0.0386425	0.0493654	0.0694076	0.107874	0.250166	0.110066	0.0858962	0.288048	0.267819	0.201647	0.360745	4.06427	3.45333	2.82855	2.24582	3.11105	2.42671	1.59879	1.51885	2.22729
29	'M'	72	160	65	Right index finger'	65	95	-3	32	-12	-45	-40	-59	58	-18	cborn4ivjtoqui5si1t0.txt	0.550534	0.827849	0.230038	0.0877021	0.0258228	0.00727734	0.00806717	0.004514	0.00213608	0.00190536	0.00119273	0.00156352	0.0200089	0.0252924	0.0363069	0.0753431	0.171172	0.379343	0.288128	0.343358	0.558294	0.49154	0.536624	0.499511	3.72635	2.98206	2.33174	1.77486	2.6629	2.62213	1.77473	3.33255	3.45175
9	'M'	70	185	90	Right index finger'	53	97	0	14	-5	-25	-5	-12	63	17	cborq32vjtoqui5si2eg.txt	0.551432	0.746349	0.257621	0.134526	0.0717826	0.0391542	0.0433775	0.0354024	0.0203217	0.0108114	0.0100819	0.00905807	0.0455601	0.0543422	0.0659354	0.0816688	0.164649	0.130115	0.0805848	0.104361	0.19254	0.154057	0.117327	0.214493	4.06891	3.59687	3.23352	2.85317	2.99551	2.96488	2.4035	1.90046	1.82462
7	'M'	78	165	60	Right index finger'	68	94	-11	27	17	-28	-24	34	38	-19	cg2m4vv2had4qgopblmg.txt	0.496292	0.813743	0.320126	0.160105	0.0646267	0.062244	0.0546121	0.0292492	0.0154124	0.0176881	0.0125203	0.00579318	0.0285889	0.0432147	0.0600041	0.0566027	0.0964977	0.131206	0.0845656	0.202211	0.136352	0.172377	0.198781	0.404256	4.23865	3.54591	3.04839	2.8998	3.10865	2.41369	1.74871	2.03344	1.7558
18	'M'	60	170	78	Right index finger'	79	95	4	5	-9	-44	33	22	-42	14	cgqikuv2had7n67r8eug.txt	0.581218	0.68518	0.250943	0.0962732	0.0700883	0.0574754	0.02134	0.0160367	0.0108772	0.00539641	0.00410048	0.00277122	0.0322456	0.0647614	0.0768647	0.210221	0.102566	0.0654964	0.207926	0.128784	0.144629	0.20236	0.173232	0.253475	3.83525	3.40836	2.79441	3.31833	2.49479	2.10323	2.31167	1.80272	1.77223
[truncated: 25 more columns]
