# Supplementary material for: A Correlation Study on the Prediction of Coronary Artery Lesion Degree by Pulse Wave Harmonics Based on SYNTAX Score
Source: Research Square preprint supplement (doi:10.21203/rs.3.rs-6201108/v1), 2025-07-01
Supplement: Supplementary file 2 [file b170814b851b21fd94873a14.xlsx]

## Sheet: 工作表1
Syntax 2	Gender	Age	Height	Weight	Finger	HR	SpO2	C0	C1	C2	C3	C4	C5	C6	C7	Raw File Name	c0	c1	c2	c3	c4	c5	c6	c7	c8	c9	c10	c11	c0cv	c1cv	c2cv	c3cv	c4cv	c5cv	c6cv	c7cv	c8cv	c9cv	c10cv	c11cv	p1	p2	p3	p4	p5	p6	p7	p8	p9
11	'F'	64	158	65	Left index finger'	72	95	-13	31	30	-12	8	-9	11	10	cfllkeivjtonbn3bpnag.txt	0.481551	0.852636	0.352348	0.211155	0.125235	0.0840392	0.0611347	0.037147	0.0224609	0.0152173	0.0104474	0.00666475	0.0599794	0.0885172	0.0669633	0.0642498	0.0725992	0.0877887	0.112284	0.122394	0.134945	0.176161	0.182583	0.280762	4.37272	3.80382	3.33669	2.9164	2.64258	2.25479	1.79299	1.50993	1.3001
2	'F'	57	165	60	Left index finger'	86	96	-14	27	52	-47	20	-12	-33	15	cg8nmlkg0t8d04b7s0ug.txt	0.481259	0.824033	0.411928	0.141499	0.0957038	0.0621391	0.0269635	0.0177902	0.0123406	0.00680168	0.0041768	0.00298846	0.0149282	0.0231148	0.0287664	0.0683824	0.0357435	0.0746814	0.099403	0.0720083	0.0744404	0.146823	0.125788	0.200794	4.28011	3.48411	2.82603	2.85742	2.19386	1.84024	1.74685	1.37565	1.14262
11	'F'	73	170	60	Left index finger'	71	96	-12	24	13	-50	-37	88	-17	0	cge0ldv2had620d2g3o0.txt	0.485699	0.835635	0.308003	0.108951	0.0332364	0.0507709	0.0288562	0.0148805	0.0144159	0.0091703	0.00585749	0.00436936	0.0652946	0.0870224	0.131883	0.295036	0.642816	0.134971	0.158454	0.281767	0.11847	0.164951	0.277262	0.237224	4.02925	3.21718	2.47602	3.34451	3.02968	2.22693	2.39342	2.19448	1.8497
7	'F'	73	158	57	Left index finger'	78	91	-7	16	26	-33	-25	-3	-12	-20	chmt5kn2had5ptrsf71g.txt	0.521113	0.754209	0.340168	0.153163	0.064802	0.0480918	0.0282188	0.0122504	0.0106183	0.00777499	0.00435583	0.00277368	0.0180472	0.028184	0.0268675	0.0691094	0.046702	0.0706922	0.0707154	0.0715619	0.120017	0.0957386	0.120698	0.224616	4.1101	3.54716	2.81252	2.69623	2.54874	2.02083	1.9205	2.02836	1.64605
3	'F'	40	160	72	Left index finger'	93	99	-7	8	36	-40	0	8	21	-2	cfmse8ivjtonbn3c05ug.txt	0.544644	0.667757	0.342019	0.133206	0.0792788	0.0688189	0.0591385	0.0427699	0.0275665	0.00951951	0.00796595	0.00578337	0.0650606	0.120424	0.114437	0.164929	0.147217	0.307248	0.558684	0.665336	0.601501	0.534863	0.460116	0.444699	4.0481	3.68136	2.89865	2.95444	2.53229	2.80332	2.81026	2.55697	2.49383
0	'F'	51	160	72	Left index finger'	75	95	-5	22	6	-37	-1	1	-41	3	cggle5v2had620d3kt90.txt	0.527651	0.803739	0.292861	0.11917	0.0633725	0.0513202	0.0193127	0.0117675	0.0094181	0.00339296	0.00213794	0.00291895	0.033995	0.0536255	0.0856956	0.160394	0.144532	0.163477	0.252341	0.330721	0.168972	0.29382	0.856673	0.726115	4.00697	3.36089	2.627	3.00636	2.23226	1.50573	2.0415	1.62715	0.955188
28	'F'	70	158	60	Left index finger'	76	96	-10	28	8	-41	-14	42	-20	-39	cgqi4ev2had7n67r85sg.txt	0.512397	0.819533	0.272857	0.100649	0.045497	0.0502276	0.0266396	0.00856503	0.00821979	0.00526821	0.0023111	0.00202667	0.0212106	0.0456106	0.115089	0.190394	0.132659	0.123059	0.211777	0.265712	0.158331	0.216206	0.312777	0.515476	4.00234	3.27004	2.64965	3.06166	2.54692	1.73509	1.61223	1.72863	1.11337
13	'F'	64	160	65	Left index finger'	79	99	-7	17	18	-39	-15	24	-16	-14	cgglhtsg0t8edo0amda0.txt	0.528802	0.719406	0.33384	0.130376	0.0679535	0.0555434	0.0315835	0.0144089	0.0148843	0.00968721	0.00745028	0.00439022	0.0570377	0.147063	0.235286	0.192329	0.677571	0.167018	0.460301	0.239454	0.460005	0.355874	1.14091	0.402432	4.05181	3.439	2.80327	3.16723	2.49752	2.02345	2.19998	1.97238	1.57275
0	'F'	72	160	76	Left index finger'	77	93	-9	22	18	-42	-39	39	-34	-30	cdavffcg0t8bqalbirfg.txt	0.512278	0.787738	0.313825	0.118458	0.039424	0.0427784	0.0181692	0.00748779	0.00806019	0.00487589	0.00205092	0.00130081	0.0100356	0.0161462	0.0300648	0.076135	0.0758885	0.0608964	0.124192	0.155524	0.130042	0.241466	0.360091	0.466675	3.97734	3.32579	2.3893	2.91902	2.51757	1.81281	1.90483	1.80698	1.32171
0	'F'	69	153	50	Left index finger'	56	96	-7	22	5	-33	-29	-25	56	27	cbfl2asg0t87cj2o8160.txt	0.511568	0.796101	0.288869	0.12646	0.0453576	0.0260197	0.029653	0.0216862	0.010891	0.00533307	0.00523072	0.00457222	0.0299338	0.0394581	0.0321352	0.0310008	0.0987815	0.0626557	0.0487959	0.0457627	0.126658	0.100365	0.0998451	0.095257	4.02948	3.36547	2.75862	2.37444	2.92583	2.68297	2.14389	1.68231	1.87796
0	'F'	65	158	80	Left index finger'	62	92	-5	18	1	-31	-26	-50	100	31	cg81kiv2had4qgoq6pig.txt	0.534946	0.768955	0.266521	0.122165	0.0456809	0.0186525	0.0286533	0.02145	0.0108232	0.00552575	0.00610626	0.00520277	0.0624036	0.0563169	0.0860126	0.0583641	0.23529	0.312313	0.191682	0.129228	0.268722	0.422027	0.342265	0.264321	3.97119	3.33803	2.78884	2.39832	3.21168	2.87551	2.34433	1.66006	2.24365
5	'F'	69	155	60	Left index finger'	75	93	-15	30	40	-22	-18	13	-5	-22	cgc2l72vjtopa61rp1pg.txt	0.479332	0.82852	0.379265	0.201404	0.0847308	0.0724007	0.0499065	0.0232927	0.0141064	0.0132396	0.00825632	0.00388513	0.0211438	0.0261774	0.0285693	0.0812192	0.0708432	0.052511	0.0935922	0.185708	0.0959384	0.136158	0.248605	0.25213	4.32422	3.66278	3.00304	2.7468	2.69476	2.04783	1.5193	1.69266	1.39617
1	'F'	64	163	65	Left index finger'	80	96	-6	23	10	-29	-34	24	-22	-48	cc3ctusg0t8e9qh4vas0.txt	0.531987	0.791849	0.294979	0.133623	0.0482961	0.0457989	0.0220952	0.00687335	0.00608365	0.00402581	0.00305715	0.00231824	0.0137686	0.0231009	0.0470282	0.150062	0.15113	0.08225	0.198388	0.371614	0.429222	0.447297	0.605309	0.530819	3.9487	3.37661	2.53553	2.83979	2.16756	1.40189	1.78724	1.56947	1.47061
16	'F'	63	157	60	Left index finger'	73	99	-8	21	7	-39	-42	59	5	-23	cgvr7o72had61ag645sg.txt	0.539731	0.760326	0.265539	0.0960839	0.0351042	0.0327804	0.0270915	0.0123581	0.00761384	0.00768118	0.00562279	0.00336568	0.113642	0.179061	0.340784	0.389875	0.498575	0.699247	0.530478	0.548886	0.685564	0.85332	0.840166	0.829325	3.82939	3.22598	2.64522	2.58864	3.26259	2.53569	1.75253	2.5108	2.11738
0	'F'	70	172	60	Left index finger'	96	96	-6	19	20	-33	16	-15	-31	23	chgvivcg0t88crmjb0l0.txt	0.514635	0.756792	0.350921	0.18246	0.10563	0.0659507	0.0325227	0.0212736	0.0129731	0.00808167	0.00384839	0.0038742	0.0846808	0.073148	0.152601	0.390391	0.219777	0.186936	0.243901	0.209277	0.34896	0.436222	0.488135	0.555408	4.13642	3.70846	2.98485	2.88336	2.22103	1.95094	1.67224	1.34679	1.24402
18	'F'	71	166	85	Left index finger'	70	95	1	12	0	3	-1	-24	21	27	cgqioif2had7n67r8h5g.txt	0.573723	0.724007	0.263259	0.183201	0.0976311	0.0564618	0.0462806	0.0332527	0.0200451	0.0136623	0.0101146	0.0067194	0.0183825	0.0282931	0.0336895	0.0402444	0.053757	0.0293419	0.0433136	0.0602689	0.0873963	0.101704	0.135338	0.178299	4.09671	3.78106	3.32824	2.89668	2.7803	2.49049	2.01437	1.70948	1.53212
12	'F'	61	170	60	Left index finger'	104	96	1	6	1	-49	67	-47	6	9	cg4lt872had4qgoplktg.txt	0.579518	0.701746	0.251755	0.0848014	0.0804051	0.0307957	0.0220614	0.0131884	0.00681033	0.00418915	0.00255344	0.00188898	0.0344339	0.060809	0.0646096	0.0728406	0.070482	0.110423	0.131914	0.16154	0.29548	0.335903	0.45455	0.659625	3.80961	3.16084	3.38893	2.76139	2.37614	2.34744	1.94027	1.68516	1.93111
10	'F'	58	156	48	Left index finger'	97	97	-2	15	11	-52	47	-35	-19	28	cblhfvivjtoh3rj0uvgg.txt	0.551833	0.739155	0.305961	0.0977164	0.0730904	0.038088	0.0183098	0.0136628	0.0074702	0.00378119	0.0028022	0.00174463	0.0189477	0.0446864	0.0486945	0.139303	0.0925478	0.154132	0.198825	0.182409	0.254957	0.268251	0.263224	0.385311	3.96293	3.28871	2.81516	2.80186	2.14015	2.18247	1.85088	1.4851	1.48976
28	'F'	70	170	65	Left index finger'	73	97	-17	31	42	-43	-54	0	-39	-40	cg9cb8sg0t8d04b7u540.txt	0.468945	0.846319	0.382783	0.137493	0.0360161	0.026602	0.0101824	0.00347178	0.002581	0.00172782	0.00114062	0.000891917	0.0165301	0.0179018	0.0245721	0.109431	0.0837444	0.0697185	0.20343	0.248385	0.319566	0.331333	0.376365	0.347001	4.06996	3.22361	2.20017	2.202	1.92265	1.31808	1.91542	1.94618	1.76692
17	'F'	79	167	70	Left index finger'	75	93	-11	27	22	-46	-8	-2	-25	11	cfu9942vjtonbn3d3t80.txt	0.504069	0.817103	0.326476	0.118773	0.0567883	0.043434	0.0222462	0.0135947	0.0100815	0.00623261	0.00413614	0.00318062	0.0186654	0.0359133	0.0394341	0.108151	0.0460259	0.0500339	0.0906467	0.0834428	0.0718929	0.116911	0.140157	0.17577	4.10055	3.3367	2.65299	2.8199	2.40143	2.02017	1.9945	1.78838	1.60672
0	'F'	57	156	71	Left index finger'	77	98	-4	20	-1	-35	9	26	-24	-1	ccaqirf2hadcsjhir1hg.txt	0.542011	0.772124	0.267975	0.111477	0.0642124	0.0624466	0.0293569	0.0164143	0.0164762	0.00966271	0.00568291	0.00443556	0.0356332	0.0563708	0.0586609	0.109999	0.11277	0.0864319	0.158858	0.209551	0.101858	0.168885	0.177559	0.155891	4.04305	3.46094	2.89571	3.21022	2.66325	2.04155	2.37053	2.02758	1.49976
8	'F'	72	160	70	Left index finger'	72	90	-9	24	13	-28	-49	17	9	-45	cfh1da2vjtonbn3an0sg.txt	0.512039	0.800574	0.305291	0.146818	0.0419265	0.0379869	0.0273397	0.0082872	0.00828459	0.00710253	0.00318392	0.00218562	0.0142529	0.0217397	0.0225009	0.0303819	0.059741	0.0767138	0.0364283	0.130946	0.134107	0.102763	0.161415	0.249068	4.04882	3.40765	2.68263	2.46049	2.65999	1.91736	1.56127	2.28938	1.64461
12	'F'	55	150	80	Left index finger'	89	92	-16	28	53	-41	-13	-6	-32	-27	chcbcjsg0t882og8t77g.txt	0.472053	0.822489	0.419321	0.159217	0.0748063	0.0506368	0.0223989	0.00903928	0.00719431	0.00410759	0.0021948	0.00178316	0.0187939	0.0170146	0.0347	0.103635	0.0411081	0.115455	0.146525	0.151134	0.134482	0.152028	0.266387	0.403317	4.19886	3.46894	2.58706	2.53458	1.90307	1.28986	1.30517	1.26035	0.758769
0	'F'	67	168	85	Left index finger'	78	97	-10	22	25	-54	-16	13	-35	-2	cg0r3n72haddiqs20950.txt	0.506362	0.790366	0.33896	0.104446	0.0475108	0.0417995	0.0184861	0.00986808	0.00789309	0.00364702	0.00169207	0.00129872	0.0167027	0.0284051	0.0297458	0.0718985	0.0548062	0.0669391	0.104228	0.0991934	0.115578	0.185957	0.367733	0.438583	4.00564	3.26727	2.39672	2.95846	2.29485	1.6738	2.08063	1.77328	1.21347
0	'F'	67	160	60	Left index finger'	70	95	-1	10	6	-13	-27	-18	18	9	cg4m2pkg0t8d04b7bq50.txt	0.54837	0.730689	0.294304	0.167546	0.0642992	0.0391783	0.0312116	0.0194932	0.0126392	0.00953117	0.00692345	0.00649373	0.107565	0.162156	0.152887	0.187306	0.265077	0.240149	0.226027	0.35895	0.417509	0.357718	0.468391	0.573621	4.00302	3.58286	2.92141	2.65961	2.7042	2.30769	1.94614	1.98145	1.76822
25.5	'F'	58	170	57	Left index finger'	80	97	-4	12	17	-44	-42	36	-23	-19	cfusfkivjtonbn3d6du0.txt	0.538604	0.725653	0.310966	0.117903	0.0319355	0.0370406	0.018569	0.0078079	0.00619785	0.00373205	0.00203206	0.00124512	0.0283438	0.0496854	0.0244505	0.111567	0.18309	0.109186	0.185289	0.21122	0.181639	0.213762	0.32365	0.557209	3.88761	3.3598	2.46215	2.8347	2.61809	1.88253	1.8236	1.70066	1.34075
10	'F'	69	160	65	Left index finger'	54	95	-15	30	27	-29	-34	-31	62	14	chgvakv2had9fa0iou10.txt	0.475798	0.841069	0.338637	0.161498	0.0589764	0.0297348	0.0312373	0.0211295	0.00776004	0.00663923	0.00764009	0.00482837	0.0318413	0.040943	0.0407431	0.0454099	0.0600261	0.100117	0.108194	0.139071	0.373104	0.233013	0.137539	0.164569	4.17032	3.45405	2.76087	2.22832	2.63435	2.44881	1.86219	1.74772	2.41638
10	'F'	71	158	60	Left index finger'	61	95	-11	25	24	-31	-35	0	8	-14	cgvs8cf2had61ag64ns0.txt	0.501048	0.807778	0.332355	0.152295	0.0539217	0.0398004	0.0292931	0.0140845	0.00712735	0.00689351	0.00492788	0.00273691	0.0102992	0.0172	0.0134207	0.0343103	0.0553934	0.0307346	0.0408486	0.0892753	0.105905	0.135798	0.138546	0.162135	4.11768	3.48648	2.74338	2.48725	2.52474	2.08757	1.65018	1.80929	1.74352
17	'F'	55	160	60	Left index finger'	70	97	-8	22	7	-15	-38	2	39	-12	cg827mn2had4qgoq6vvg.txt	0.507368	0.804062	0.295639	0.161834	0.0520457	0.0440865	0.0387902	0.0192085	0.00652692	0.00918294	0.00613463	0.0025093	0.0342365	0.0449327	0.0466159	0.0762667	0.16424	0.0956158	0.0575807	0.228145	0.337269	0.162102	0.19281	0.386206	4.10923	3.43426	2.89374	2.55855	2.92225	2.19886	1.3839	1.95402	1.92816
0	'F'	56	164	75	Left index finger'	57	98	-5	17	-1	-39	-44	68	7	-9	chmt12n2had5ptrsf4r0.txt	0.524605	0.78811	0.264414	0.0996231	0.0282656	0.0390874	0.0259321	0.0117456	0.0086955	0.00828499	0.00497824	0.00361457	0.0496438	0.0713038	0.0695138	0.151016	0.341902	0.108582	0.193738	0.654305	0.405718	0.67038	0.961385	1.50514	3.92486	3.23728	2.6013	2.81429	2.88159	2.36488	1.8144	2.79102	2.12149
0	'F'	68	169	60	Left index finger'	69	98	-6	16	11	-31	-48	36	0	-18	cgpti3v2had7n67qvb60.txt	0.519766	0.760491	0.307793	0.141091	0.0395667	0.0403648	0.0275279	0.0124935	0.0103015	0.00869351	0.00486875	0.0027882	0.0222556	0.0301825	0.0334824	0.0829728	0.116345	0.0624421	0.132641	0.174773	0.0722975	0.13848	0.249799	0.261282	4.02665	3.46611	2.65246	2.6351	2.8986	2.28021	1.9851	2.13389	1.82657
0	'F'	81	160	65	Left index finger'	85	94	-3	19	-9	-41	17	10	-29	7	chgvi0v2had9fa0ip1qg.txt	0.540454	0.780114	0.256372	0.101654	0.0533261	0.0463338	0.0236671	0.0129547	0.010117	0.00663083	0.0039932	0.00299329	0.0500421	0.0975975	0.12739	0.312065	0.134841	0.297777	0.365481	0.655811	0.525036	0.340269	0.808166	0.551911	3.95082	3.27959	2.72932	2.97794	2.52813	2.04337	2.09685	2.05421	1.86261
3	'F'	60	157	60	Left index finger'	73	92	-13	33	29	-34	-9	43	-8	-24	cfs7vf72haddiqs1k1jg.txt	0.491972	0.848389	0.342301	0.14732	0.0711181	0.0799865	0.0508714	0.021053	0.0229093	0.0176643	0.00877247	0.00831873	0.0266969	0.031058	0.0526624	0.0658661	0.049697	0.0429437	0.102224	0.130534	0.0601343	0.11302	0.201816	0.140889	4.28711	3.57545	3.06412	3.21951	2.88603	2.13831	2.00452	2.12663	1.51175
18	'F'	72	160	65	Left index finger'	76	90	0	3	11	-14	-44	-17	6	-24	chb0jlkg0t889ug9ol4g.txt	0.565662	0.67641	0.296236	0.171228	0.0488964	0.0301094	0.0229705	0.0100879	0.00497367	0.00453826	0.00275963	0.00180326	0.0165406	0.0300189	0.045777	0.0773279	0.100675	0.0873783	0.0859095	0.201979	0.290361	0.215668	0.379285	0.305593	3.87943	3.56518	2.72942	2.47619	2.69544	2.03293	1.61918	1.71785	1.60317
23.5	'F'	64	175	60	Left index finger'	75	96	-14	16	37	-11	-27	-42	-9	12	cb7moqkg0t87cj2nn1kg.txt	0.490049	0.736702	0.358049	0.219682	0.0898236	0.0378279	0.022254	0.0152553	0.00805609	0.00495488	0.00355921	0.00234155	0.0270597	0.0574041	0.0369322	0.133555	0.212257	0.192806	0.157643	0.444581	0.482859	0.510279	0.80021	0.923958	4.12758	3.62144	2.84594	2.23208	2.06223	1.89013	1.52037	1.33195	1.31087
15	'F'	79	158	80	Left index finger'	60	90	-9	19	14	-25	-31	10	43	4	chgvf6cg0t88crmjav9g.txt	0.52514	0.748115	0.308441	0.149628	0.0579355	0.0455565	0.0418613	0.0260383	0.0155812	0.0133284	0.0102354	0.00700945	0.0842159	0.121165	0.0838424	0.103761	0.278422	0.268185	0.252705	0.480622	0.596474	0.375346	0.234003	0.342943	4.08398	3.4802	2.83906	2.83112	3.14834	2.66502	2.16196	2.10107	2.08423
21	'F'	73	168	66	Left index finger'	57	98	-6	19	0	-42	-39	56	12	-24	chcb7uv2hadcimregfeg.txt	0.527966	0.762515	0.269951	0.104058	0.0358091	0.0402492	0.0311787	0.0145627	0.0101563	0.00936407	0.00593757	0.00359202	0.0394785	0.0735323	0.0675654	0.159664	0.178923	0.155259	0.177108	0.321997	0.249925	0.216427	0.336024	0.40702	3.96153	3.27371	2.74615	2.86136	3.02347	2.34367	1.97989	2.39747	2.04903
9	'F'	58	164	76	Left index finger'	77	93	-15	14	53	-2	-32	48	-12	-16	cbpg4aavjtoqui5skq5g.txt	0.479671	0.725719	0.401794	0.260355	0.0949801	0.108297	0.0638036	0.0294753	0.0299867	0.0214111	0.0140364	0.0108131	0.0134376	0.0235608	0.0243333	0.0542793	0.0558077	0.0310517	0.0707218	0.0820866	0.041418	0.0731727	0.0818406	0.0653655	4.37799	4.02776	3.06781	3.14239	2.98945	2.20654	2.11331	2.0088	1.57557
0	'F'	76	155	55	Left index finger'	68	96	-3	17	-10	-46	7	16	-9	9	cfi8e6avjtonbn3avrag.txt	0.550506	0.745972	0.244949	0.0946434	0.0509968	0.0453133	0.0273947	0.0180609	0.0147753	0.0108901	0.00807119	0.00655889	0.0458732	0.0836232	0.120366	0.28378	0.112864	0.127124	0.290581	0.206136	0.170671	0.370127	0.311442	0.279564	3.95453	3.40271	2.93884	3.11288	2.86525	2.41167	2.63329	2.51224	2.20693
8	'F'	67	163	65	Left index finger'	86	93	-5	22	4	-46	6	1	-34	13	cbtfkh2vjtoqui5t4vf0.txt	0.53094	0.790666	0.283025	0.103935	0.0575798	0.0459024	0.0207776	0.0125756	0.00999628	0.00487738	0.00296338	0.00224167	0.00646255	0.0121565	0.0295712	0.12234	0.0700535	0.0684968	0.154445	0.130788	0.1279	0.160968	0.235046	0.275039	3.97548	3.31561	2.6856	2.94168	2.36666	1.84047	2.06457	1.6664	1.25904
3	'F'	66	155	60	Left index finger'	58	95	-6	19	6	-27	-37	-20	44	3	chgvckcg0t88crmjaub0.txt	0.54145	0.769476	0.268388	0.13138	0.0473428	0.0275778	0.0275417	0.0168873	0.00722878	0.0056806	0.00545963	0.00351306	0.074304	0.0710657	0.121133	0.121199	0.161592	0.275802	0.215051	0.21829	0.344546	0.328259	0.362283	0.321747	3.95786	3.39222	2.87099	2.43363	2.84743	2.55387	2.0031	1.82812	2.21047
0	'F'	53	165	75	Left index finger'	80	96	-8	21	15	-33	-49	7	-6	-22	cg4lq5cg0t8d04b7bo60.txt	0.517393	0.782612	0.307682	0.135801	0.0387012	0.0314712	0.0196145	0.00839895	0.00668144	0.00490991	0.00262538	0.00180174	0.0239534	0.0341787	0.040738	0.110564	0.17773	0.0809437	0.106959	0.207233	0.140708	0.154039	0.40784	0.485369	3.97291	3.33111	2.49451	2.47163	2.52405	1.85243	1.83758	1.90091	1.54543
6	'F'	60	160	75	Left index finger'	70	97	2	4	7	-2	1	16	6	7	chmsuhn2had5ptrsf3pg.txt	0.579426	0.666916	0.282154	0.185175	0.101749	0.0903436	0.0643103	0.0391873	0.0302	0.0238469	0.0174872	0.0132686	0.0299369	0.0466243	0.0429174	0.05913	0.0570236	0.0442627	0.0417647	0.0676467	0.0630935	0.0491579	0.0666053	0.0872843	4.20311	3.91353	3.38623	3.31827	3.10418	2.5891	2.3071	2.19546	1.94299
13	'F'	81	150	67	Left index finger'	73	90	-7	17	24	-34	-11	-8	-16	5	cg81uj4g0t8d04b7paq0.txt	0.522374	0.757816	0.337051	0.145443	0.073874	0.0508699	0.0280252	0.0166697	0.0119378	0.00782787	0.00518828	0.00363649	0.0125446	0.024777	0.0246004	0.0654035	0.0325872	0.0401452	0.0615549	0.0456895	0.067953	0.0658933	0.108831	0.110724	4.14092	3.52268	2.87204	2.86208	2.54058	2.12017	2.07777	1.95631	1.69664
29	'F'	72	155	70	Left index finger'	87	96	-12	28	20	-35	-62	100	-6	-66	cghvk4n2had620d48psg.txt	0.489094	0.837106	0.325489	0.140721	0.0305656	0.0513731	0.0324989	0.005758	0.00779111	0.00603958	0.00233938	0.00181348	0.0194427	0.0342473	0.0433765	0.121223	0.222715	0.0978929	0.0893147	0.382409	0.261742	0.154711	0.265063	0.313177	4.05552	3.3381	2.53538	3.05527	2.44798	1.46443	1.01266	1.59924	0.977106
7	'F'	46	164	65	Left index finger'	103	98	4	2	11	-54	76	-28	-32	35	cg06c82vjtonbn3dcncg.txt	0.596303	0.662168	0.292804	0.100687	0.0914794	0.0457788	0.0225697	0.0146534	0.00810147	0.00501546	0.00481461	0.00415313	0.0713452	0.135031	0.202813	0.35668	0.337074	0.427458	0.511916	0.521035	0.52517	0.51721	0.493557	0.541761	3.80449	3.4666	3.17626	2.79675	2.19053	1.96385	1.87815	2.13266	2.4096
32.5	'F'	71	160	65	Left index finger'	77	94	-14	31	16	-50	-61	82	-12	-29	cfi8saivjtonbn3b03jg.txt	0.482467	0.85781	0.3092	0.104637	0.0186043	0.029461	0.017862	0.00616832	0.00636919	0.00387743	0.00216657	0.00168683	0.014724	0.0205512	0.0198775	0.0505431	0.0814117	0.0348285	0.0809152	0.14543	0.106342	0.199913	0.238202	0.375927	3.97422	3.10512	2.21378	2.53205	2.76626	1.99983	2.03944	2.0945	1.61505
13	'F'	77	160	64	Left index finger'	70	97	-11	30	-5	-53	9	28	-44	0	cgc2jhivjtopa61rp0qg.txt	0.512403	0.855219	0.233597	0.0809802	0.0461564	0.0388026	0.0200963	0.0106914	0.00971369	0.00678523	0.00481729	0.0046394	0.131576	0.213766	0.262453	0.405818	0.295857	0.409051	0.519469	0.507595	0.423355	0.625492	0.687548	0.798098	3.7206	2.87412	2.60079	3.44639	2.65224	2.21013	2.77139	2.30295	2.28395
19	'F'	79	158	60	Left index finger'	74	96	-2	17	1	-52	31	-6	-18	15	cfi92jf2haddiqs0ssf0.txt	0.551807	0.75504	0.263656	0.0864004	0.0580349	0.042981	0.02327	0.014826	0.0105743	0.00574585	0.00317921	0.0022943	0.0107728	0.0193434	0.0152411	0.127139	0.0441163	0.0647289	0.140212	0.0897705	0.123794	0.271603	0.273184	0.18963	3.91175	3.34034	2.79355	3.03996	2.55836	2.12916	2.08745	1.86883	1.47289
16	'F'	68	170	60	Left index finger'	60	92	-9	25	16	-37	-40	-3	0	-23	chd0ch4g0t88crmijurg.txt	0.504031	0.818461	0.316928	0.130749	0.0421352	0.0314745	0.0209874	0.00871949	0.00573483	0.00489927	0.00283007	0.00195872	0.028749	0.0333471	0.0497011	0.052258	0.0613519	0.150432	0.134148	0.100199	0.151261	0.205453	0.246379	0.321373	4.03916	3.32507	2.60088	2.36552	2.4731	1.94199	1.67962	2.08322	1.76795
11	'F'	60	168	77	Left index finger'	61	93	-12	25	21	5	-10	-38	30	24	cfh1ee2vjtonbn3an18g.txt	0.481367	0.823324	0.337229	0.236477	0.119417	0.0565153	0.0488063	0.0354066	0.0178081	0.00893852	0.00769006	0.00555782	0.0252153	0.025095	0.0256057	0.0471351	0.05666	0.0498513	0.0352891	0.0643359	0.0820974	0.109067	0.105029	0.131047	4.28796	3.81115	3.23825	2.54689	2.48762	2.3144	1.71508	1.17861	1.2398
9	'F'	43	170	50	Left index finger'	72	91	-9	21	15	-37	-49	58	-1	-33	chlhfb72had5ptrs5gk0.txt	0.508643	0.785998	0.312601	0.132158	0.0366377	0.0426988	0.0283142	0.0104985	0.00803691	0.00675326	0.00322775	0.00140814	0.0087124	0.0152521	0.0167284	0.0404092	0.066145	0.0494352	0.0550619	0.106733	0.113947	0.101723	0.215171	0.337094	4.02684	3.35724	2.57547	2.73315	2.77013	1.98438	1.5635	2.00579	1.51981
0	'F'	69	160	52	Left index finger'	58	100	-13	32	6	-51	-74	100	51	-15	chmt07kg0t8fl7e725vg.txt	0.480727	0.857851	0.293073	0.0965959	0.0135442	0.0254876	0.0260274	0.0130515	0.00897485	0.00911698	0.00554316	0.00211606	0.0206572	0.0263556	0.0397091	0.0779681	0.251644	0.208458	0.145584	0.208622	0.169136	0.0994411	0.201513	0.330827	3.9429	2.99361	2.13089	1.34238	3.82798	2.92715	2.35713	2.60205	2.17993
0	'F'	52	163	85	Left index finger'	64	99	-4	16	1	-14	-21	-52	100	48	cfs80livjtonbn3cqb60.txt	0.550188	0.738329	0.269976	0.137434	0.061535	0.0217071	0.0299546	0.0230246	0.0110397	0.00792295	0.00780696	0.00503299	0.0934534	0.127367	0.118724	0.136885	0.332363	0.528351	0.219983	0.198657	0.639722	0.551605	0.1844	0.304157	3.9581	3.36853	2.91513	2.2465	3.06501	2.92024	2.17825	1.52838	2.35541
8	'F'	70	158	58	Left index finger'	49	94	-8	19	14	-25	-7	-47	18	70	cgchtsavjtopa61rt0dg.txt	0.523633	0.765251	0.299377	0.146795	0.0737839	0.0288385	0.0234939	0.0229848	0.0152674	0.00677231	0.00431174	0.00519361	0.0433361	0.0571127	0.0541893	0.065349	0.0886275	0.0861842	0.0761701	0.0729414	0.0710315	0.129796	0.144574	0.110398	4.08653	3.49553	3.00555	2.50955	2.40294	2.74777	2.39359	1.8374	1.50292
12	'F'	67	166	50	Left index finger'	60	95	-9	18	16	-19	-16	-36	76	45	cgptkef2had7n67qvchg.txt	0.515549	0.756802	0.309822	0.162642	0.0723776	0.0362097	0.0438541	0.0354835	0.0201564	0.00842738	0.00662095	0.00519402	0.0342884	0.0523612	0.0463279	0.0390826	0.0824281	0.073199	0.0883843	0.111807	0.133702	0.140407	0.295905	0.341397	4.12175	3.57696	3.07769	2.61134	2.9115	2.68516	2.02797	1.43115	1.33668
18	'F'	78	150	55	Left index finger'	62	94	-8	24	2	-29	-33	17	37	10	chb0mmsg0t889ug9olm0.txt	0.534742	0.76701	0.258336	0.109096	0.0349902	0.0373085	0.0352855	0.0197689	0.0116001	0.0103403	0.00766859	0.0051139	0.0206323	0.0211456	0.0277773	0.0446249	0.120393	0.0562116	0.0449613	0.0926522	0.141821	0.10747	0.150082	0.223418	3.97337	3.35036	2.8347	2.75537	3.22211	2.61755	2.16599	2.2027	2.09563
0	'F'	69	168	70	Left index finger'	75	94	-6	24	-7	-55	0	6	-44	47	cck1apn2hadcsjk3a8fg.txt	0.532634	0.796471	0.242038	0.0725149	0.0395605	0.0324598	0.0120206	0.00992909	0.00786084	0.00350294	0.00239893	0.00182609	0.0174311	0.0272217	0.0372576	0.0949882	0.0735352	0.080325	0.216044	0.107761	0.0986312	0.205019	0.242813	0.216618	3.83096	3.09459	2.46807	3.11519	2.49572	2.18586	2.50348	2.02273	1.9537
0	'F'	57	170	80	Left index finger'	66	97	-1	14	1	-22	-25	-3	17	1	cfi8f5avjtonbn3avrtg.txt	0.546298	0.749207	0.275173	0.134464	0.0519752	0.0403359	0.0310361	0.0173381	0.0125469	0.0100266	0.0068187	0.00479412	0.0271462	0.0312149	0.0325755	0.0722496	0.104268	0.063777	0.0990395	0.146474	0.0928809	0.120786	0.149764	0.165772	4.00528	3.49388	2.92307	2.70145	2.82863	2.43802	2.13863	2.14097	1.95824
6	'F'	58	155	58	Left index finger'	56	96	0	10	17	-11	-8	0	29	23	chirj4sg0t88crmjlde0.txt	0.564884	0.697133	0.301285	0.179015	0.0894318	0.0662258	0.0584726	0.0413752	0.0275971	0.0215123	0.0174924	0.0133955	0.0234162	0.0301036	0.0349446	0.0384832	0.0501513	0.0439535	0.0458242	0.0502244	0.061074	0.0681558	0.0731105	0.0922734	4.1681	3.97188	3.38738	3.11152	3.11834	2.77081	2.36046	2.14804	2.03387
8	'F'	64	160	70	Left index finger'	77	94	0	6	11	-43	4	22	-30	19	cgj91vcg0t8edo0bitig.txt	0.567359	0.684043	0.288515	0.109195	0.0597467	0.0572748	0.0269252	0.0174978	0.0156187	0.00919354	0.00603362	0.00421911	0.0118455	0.0228244	0.0258687	0.0383798	0.0573511	0.040281	0.0540974	0.0690535	0.0370504	0.0554569	0.111764	0.163422	3.94777	3.50533	2.81607	3.30097	2.76297	2.29373	2.44501	2.12377	1.8766
0	'F'	49	160	55	Left index finger'	73	98	-3	15	1	-44	-25	13	-13	-3	cck1gnsg0t85o6e338q0.txt	0.544261	0.747135	0.270149	0.0934242	0.0411217	0.0360107	0.0195935	0.0110864	0.00843221	0.00541171	0.00293903	0.00166762	0.0328913	0.0581702	0.0485796	0.162298	0.133455	0.100052	0.197281	0.128868	0.1949	0.360214	0.324042	0.461753	3.89108	3.26135	2.60519	2.87376	2.82425	2.40534	2.36254	2.32013	1.95816
10	'F'	73	161	80	Left index finger'	62	99	-12	27	27	-11	-11	5	57	13	cfuse9qvjtonbn3d6dog.txt	0.525449	0.742749	0.324979	0.180526	0.0913589	0.0759492	0.0682688	0.0421384	0.0236459	0.0199979	0.0162964	0.0114621	0.119056	0.209942	0.203193	0.223371	0.254106	0.331853	0.20841	0.316779	0.283645	0.2512	0.336381	0.283237	4.29416	3.78536	3.25524	3.04071	2.97501	2.46313	2.26318	2.11169	2.0774
0	'F'	83	158	48	Left index finger'	74	96	-12	29	19	-36	-26	27	-3	-24	cbflecv2hadbnne3ir0g.txt	0.491489	0.839728	0.326697	0.140004	0.0548172	0.0549614	0.0364005	0.0154193	0.0121628	0.00994014	0.00586946	0.00410258	0.0192372	0.031299	0.032305	0.087047	0.121364	0.0875106	0.112238	0.383586	0.160803	0.171538	0.298799	0.357043	4.15859	3.40251	2.77948	2.91334	2.67938	1.98795	1.87575	2.01114	1.57863
15	'F'	63	158	70	Left index finger'	66	96	-11	23	29	-12	-19	13	31	8	cg7dvbsg0t8d04b7n29g.txt	0.504534	0.789105	0.341005	0.198943	0.0892532	0.0774457	0.0683877	0.0415044	0.0176294	0.0158858	0.012761	0.00765555	0.0281822	0.0694424	0.0507438	0.0710949	0.13496	0.111721	0.0911879	0.144028	0.137162	0.186436	0.213821	0.308039	4.29868	3.70875	3.22139	2.88315	3.04455	2.39827	1.67256	1.56664	1.59779
0	'F'	58	160	72	Left index finger'	68	96	-15	35	32	-35	-21	64	-18	-18	ch3r88n2had61ag7qjd0.txt	0.481276	0.878454	0.346996	0.142656	0.0705006	0.0843255	0.0409658	0.022466	0.0233399	0.0131737	0.00734836	0.0060999	0.0474011	0.0986453	0.143884	0.157862	0.20167	0.157185	0.223342	0.185889	0.170931	0.336761	0.425665	0.233483	4.26544	3.52285	2.84956	3.35105	2.74293	1.87981	2.12417	1.79563	1.12842
0	'F'	59	167	67	Left index finger'	64	94	0	11	2	-26	-7	-2	2	6	cck17t72hadcsjk3a7vg.txt	0.569654	0.713005	0.273908	0.134293	0.06748	0.0498142	0.0348486	0.0211107	0.01351	0.0102172	0.00696677	0.00430214	0.036894	0.0525111	0.0464164	0.101198	0.0766984	0.0675327	0.169475	0.216508	0.164091	0.148654	0.270845	0.461396	3.99826	3.56828	3.05897	2.89639	2.78751	2.41067	2.10768	1.99681	1.80864
0	'F'	58	165	68	Left index finger'	78	98	-18	4	38	42	-27	-38	28	16	cbtfmoivjtoqui5t4vvg.txt	0.484328	0.56109	0.347867	0.276857	0.165095	0.0622516	0.0812314	0.0349743	0.0479204	0.016917	0.0140041	0.0126964	0.0582374	0.352351	0.272901	0.392233	0.751344	0.246975	1.01169	0.457617	1.71266	1.82348	1.29681	2.34263	4.23705	3.99	3.21107	2.59614	2.53956	2.15085	1.60663	1.23813	1.52924
12	'F'	66	160	62	Left index finger'	76	94	-8	27	18	-59	100	-26	-44	99	cflle3avjtonbn3bpl6g.txt	0.522087	0.817954	0.314978	0.0831987	0.0986108	0.0520634	0.0210642	0.022601	0.0105836	0.00684094	0.00560002	0.00339319	0.0113721	0.0169376	0.0274154	0.0756041	0.0262785	0.109648	0.0898706	0.03365	0.137876	0.0876659	0.114144	0.164282	4.09952	3.33402	2.98379	3.02131	2.11423	2.31508	1.92882	1.43176	1.62332
0	'F'	79	158	61	Left index finger'	69	89	-1	8	12	-20	-32	-1	3	-3	cfi8ghqvjtonbn3avsj0.txt	0.549113	0.73461	0.289177	0.145623	0.053787	0.0424902	0.0281938	0.0149215	0.0108754	0.00816015	0.00617706	0.00423545	0.0672181	0.0600227	0.177547	0.184213	0.124311	0.300445	0.127721	0.243801	0.33489	0.240223	0.374849	0.551741	3.96362	3.50087	2.84249	2.69514	2.76833	2.3462	1.98625	2.07571	1.96647
18	'F'	67	160	75	Left index finger'	67	96	-17	28	43	-14	-28	-20	25	4	cfmsfuqvjtonbn3c06o0.txt	0.462631	0.836713	0.388499	0.220725	0.0840039	0.0530628	0.04498	0.0259378	0.0124272	0.00858657	0.00620742	0.00413697	0.0340294	0.0478211	0.05131	0.0681008	0.0978655	0.069083	0.0835431	0.100316	0.0980945	0.100336	0.122521	0.203366	4.31773	3.66734	2.9346	2.46579	2.6327	2.14576	1.58001	1.41744	1.40843
19	'F'	57	158	58	Left index finger'	63	94	-11	26	25	-31	-33	19	-1	-28	cgchvqqvjtopa61rt1f0.txt	0.497607	0.81864	0.337751	0.155029	0.0552585	0.0528277	0.0346907	0.0137299	0.0102223	0.00840501	0.0041426	0.00250711	0.0111471	0.019852	0.0149959	0.0277424	0.026773	0.0417011	0.054227	0.0815502	0.0765539	0.0743583	0.11358	0.136354	4.16152	3.50259	2.76352	2.68849	2.60765	1.96289	1.68914	1.90906	1.5162
9	'F'	77	154	69	Left index finger'	75	96	-11	7	63	-36	-16	5	-22	31	cg205gkg0t8d04b71emg.txt	0.50133	0.691605	0.43106	0.177418	0.081424	0.0656437	0.0336638	0.0254129	0.0171474	0.0107989	0.00768786	0.00523287	0.0105014	0.0234189	0.0215512	0.0315782	0.0307667	0.0451004	0.0390069	0.0542524	0.0616723	0.069948	0.0879863	0.116475	4.22421	3.76987	2.83827	3.01336	2.53601	2.20619	2.04465	1.66458	1.43446
15	'F'	69	160	60	Left index finger'	70	96	-10	26	10	-35	-41	13	32	-3	chgvqk72had9fa0ip75g.txt	0.502961	0.815937	0.293708	0.12039	0.034545	0.0359289	0.0298311	0.0146137	0.00792058	0.00700893	0.00476479	0.00271626	0.0167852	0.0267392	0.0363807	0.0875965	0.177463	0.231745	0.147104	0.209725	0.198818	0.303864	0.332032	0.322964	4.03069	3.27783	2.66429	2.66617	2.91057	2.24025	1.71794	1.95689	2.04633
11	'F'	69	158	75	Left index finger'	74	94	-3	14	-5	-45	-31	61	-21	-28	cgvsabkg0t889ug8sc9g.txt	0.548167	0.736925	0.254766	0.0945728	0.0344069	0.0432899	0.021965	0.00812197	0.0090589	0.00652985	0.00362802	0.00312457	0.0196667	0.0307402	0.0276082	0.0448103	0.0984319	0.0604962	0.11401	0.258651	0.302574	0.299609	0.33571	0.506312	3.84744	3.22086	2.62662	3.14635	2.82447	2.06838	2.38822	2.33818	1.82252
9	'F'	77	173	55	Left index finger'	59	98	-18	35	34	-18	-35	11	75	9	cgvqp9sg0t889ug8s72g.txt	0.465483	0.864266	0.31583	0.170326	0.0739929	0.0630776	0.0596884	0.0354694	0.017015	0.0128654	0.00986795	0.00538801	0.0912864	0.160167	0.295152	0.239931	0.608696	0.508903	0.438396	0.464628	0.641369	0.675408	0.556708	0.727944	4.26365	3.5199	2.97338	2.54675	3.33008	2.6103	1.83367	1.54946	1.69756
10	'F'	60	158	72	Left index finger'	66	92	-16	34	38	-32	-37	30	7	-17	cg81itf2had4qgoq6op0.txt	0.471247	0.861694	0.365095	0.160826	0.0562132	0.0553915	0.039116	0.018501	0.0122303	0.0104667	0.00666239	0.00360684	0.0203781	0.0255082	0.0444535	0.119742	0.0932128	0.0590851	0.131232	0.19167	0.106301	0.146131	0.24403	0.270053	4.24233	3.51132	2.76585	2.67226	2.76439	2.09028	1.56877	1.73659	1.49968
39	'F'	81	155	60	Left index finger'	64	96	-7	19	17	-37	-28	-19	18	19	cbgtesf2hadbnne3mu90.txt	0.53227	0.755252	0.29707	0.117473	0.0402774	0.0290073	0.0221119	0.0143204	0.00851457	0.00555425	0.00415187	0.00257892	0.0296309	0.0371222	0.0316359	0.0688361	0.0880781	0.0863836	0.0871079	0.121039	0.163377	0.118124	0.160035	0.219314	3.95994	3.33786	2.6713	2.5687	2.7449	2.4691	2.16478	1.9674	1.86641
0	'F'	58	160	80	Left index finger'	68	94	-14	30	21	-26	-47	56	22	-35	cgn77372had620d61ksg.txt	0.488669	0.836133	0.320755	0.156492	0.0449907	0.0545356	0.0444806	0.01613	0.00898686	0.00969574	0.0050308	0.00179083	0.0281361	0.0444793	0.0327498	0.0418299	0.0780019	0.0698611	0.0622073	0.203179	0.190841	0.132821	0.222598	0.396931	4.16286	3.41406	2.76929	2.70091	2.84948	1.91834	1.26405	2.12754	1.49339
0	'F'	64	158	78	Left index finger'	64	95	-9	18	26	-31	-28	-16	2	-5	cgvs5qsg0t889ug8sbu0.txt	0.510737	0.76092	0.340769	0.156194	0.0615289	0.0398983	0.02748	0.0146042	0.00975109	0.00846913	0.00557493	0.00376131	0.0219905	0.0329488	0.0239873	0.0485713	0.0624903	0.0583013	0.0678388	0.111098	0.0766416	0.103739	0.171381	0.206356	4.11854	3.54555	2.8098	2.51142	2.56566	2.2096	1.9983	2.1036	1.99396
3	'F'	46	148	72	Left index finger'	80	95	-12	27	28	-62	-3	-11	-35	14	chc61lcg0t889ug9rtn0.txt	0.493256	0.823899	0.34564	0.0851052	0.0462508	0.0312083	0.0133376	0.00857243	0.00622851	0.002568	0.00151806	0.00115792	0.0114542	0.0152252	0.0369529	0.155004	0.0706332	0.0829607	0.154163	0.136232	0.117838	0.243407	0.240136	0.346901	4.00853	3.09909	2.36058	2.71338	2.16732	1.95181	2.14319	1.60621	1.43416
9	'F'	64	155	65	Left index finger'	64	96	-6	23	-8	-46	-20	43	8	-6	cggld7kg0t8edo0ama80.txt	0.532313	0.785884	0.246774	0.0911956	0.0385243	0.0418794	0.0317002	0.0172952	0.0140571	0.0125733	0.00842574	0.00580339	0.0189684	0.0281171	0.0418979	0.100506	0.134486	0.0792591	0.147494	0.156053	0.146046	0.157891	0.228775	0.194269	3.98675	3.32227	2.86008	3.07527	3.1326	2.58841	2.33134	2.4501	2.17441
8	'F'	82	153	63	Left index finger'	63	96	-2	13	-3	-29	-15	34	0	-1	cbkt78sg0t87cj2okuqg.txt	0.553154	0.729204	0.255002	0.1166	0.0533265	0.0560947	0.0365089	0.0195032	0.0163942	0.0132472	0.00930856	0.00678065	0.0137742	0.0163509	0.030138	0.0701433	0.0758876	0.0508833	0.121292	0.129394	0.0911275	0.10673	0.144133	0.153726	3.99624	3.4558	3.01917	3.25529	3.00524	2.47526	2.3649	2.28823	1.96331
25	'F'	81	156	60	Left index finger'	110	97	-11	30	21	-64	39	-23	-49	36	cgvs6in2had61ag64n1g.txt	0.502758	0.850367	0.309055	0.0663356	0.0589237	0.0324779	0.0108565	0.0094114	0.00487249	0.00250551	0.0019869	0.00131445	0.0166538	0.0171663	0.066832	0.198954	0.0954222	0.122898	0.171693	0.126194	0.156829	0.298631	0.413867	0.449864	3.94682	3.01381	2.73024	2.66422	1.72483	1.84877	1.56132	1.1525	0.960294
30.5	'F'	57	165	63	Left index finger'	82	98	-11	17	38	-42	-34	12	-17	-12	cbab6tavjtoh3rj055r0.txt	0.496516	0.773511	0.383484	0.13876	0.0584231	0.0466833	0.0243149	0.0126254	0.00822673	0.00506024	0.00282472	0.00312574	0.0411158	0.0660909	0.084697	0.217347	0.186591	0.10297	0.228633	0.244312	0.189146	0.313842	0.50645	0.465564	4.11848	3.49169	2.58638	2.71273	2.4147	1.87861	1.55947	1.52844	1.21604
10	'F'	56	155	56	Left index finger'	63	97	-8	17	13	-36	-42	15	18	-5	ccde364g0t8e9qn4ssq0.txt	0.509958	0.75075	0.305705	0.138998	0.0382917	0.0361978	0.0303658	0.0137347	0.00736692	0.00836809	0.00485654	0.00290469	0.035074	0.218706	0.0971006	0.287385	0.988225	0.256251	0.438801	0.919612	0.179929	0.696172	0.741004	0.80925	3.99446	3.33545	2.50368	2.50581	2.90277	2.25044	1.93485	2.24837	1.93582
5	'F'	89	160	55	Left index finger'	79	96	-9	25	4	-41	-10	29	-22	-24	cc23n6ivjtoqui5tp280.txt	0.515129	0.816849	0.27433	0.109529	0.054373	0.0517835	0.0278847	0.0114069	0.0105594	0.00679757	0.00320319	0.00234648	0.0293833	0.0332145	0.0780008	0.103014	0.132148	0.0874522	0.135008	0.195369	0.194692	0.160942	0.369393	0.576071	4.01412	3.27106	2.72072	3.06518	2.55165	1.91121	1.89464	1.94971	1.52833
3	'F'	76	157	64	Left index finger'	74	92	-7	25	8	-36	-9	7	-28	-8	chgvnscg0t88crmjb2dg.txt	0.53179	0.787601	0.288892	0.106755	0.061423	0.0465628	0.0221389	0.0108524	0.0119488	0.00580591	0.00434822	0.00340337	0.0328972	0.0978871	0.115666	0.22017	0.297791	0.121318	0.378026	0.390983	0.539314	0.709081	0.935847	1.02892	4.00049	3.34682	2.70778	2.93459	2.35569	1.72022	2.2027	1.83067	1.44438
3	'F'	76	170	84	Left index finger'	75	94	-11	21	32	-14	-19	0	14	8	cgn29g4g0t8edo0cj0pg.txt	0.501899	0.770802	0.350027	0.200269	0.0882423	0.066102	0.051894	0.0312234	0.0226374	0.018238	0.0126218	0.00877961	0.0190442	0.0357528	0.0284324	0.108242	0.140255	0.0444276	0.111658	0.163082	0.0759761	0.113796	0.194324	0.252542	4.27577	3.83305	3.13594	2.83033	2.84383	2.40807	2.04875	1.96289	1.62417
0	'F'	74	155	55	Left index finger'	69	94	-6	18	14	-36	-34	15	-10	-32	cfe8v9ivjtonbn3a6660.txt	0.515963	0.79879	0.311844	0.138791	0.0595618	0.0403577	0.0233463	0.0106218	0.00803832	0.0100608	0.00555345	0.00467251	0.145473	0.184957	0.222356	0.380353	0.743653	0.542202	0.369515	0.684177	1.03711	1.43643	0.886577	0.700392	3.89727	3.30054	2.54968	2.55553	2.39891	1.74899	2.10482	2.3437	2.03431
0	'F'	80	158	60	Left index finger'	72	98	-8	23	10	-36	-31	1	1	-19	cgptqp72had7n67qvfu0.txt	0.516324	0.795564	0.295127	0.123586	0.0456656	0.0360365	0.0251029	0.0106104	0.00720302	0.00546587	0.00344763	0.00183487	0.0198383	0.0269899	0.0424217	0.0499719	0.0729916	0.159408	0.146713	0.192301	0.170334	0.190021	0.145262	0.379836	4.01174	3.28062	2.67849	2.71503	2.6464	2.07205	1.79122	2.05516	1.92033
0	'F'	66	162	74	Left index finger'	71	95	-3	16	4	-28	-37	24	-7	-23	cck1eikg0t85o6e3381g.txt	0.542509	0.757974	0.282224	0.133545	0.0453579	0.0423143	0.0263168	0.0109106	0.00671188	0.00451066	0.00242946	0.00143949	0.0212218	0.022948	0.0275506	0.0643571	0.0698952	0.0564314	0.0797887	0.129842	0.11362	0.139253	0.218291	0.299431	3.9455	3.43384	2.72325	2.72702	2.62141	1.92406	1.62199	1.70597	1.47147
0	'F'	66	163	58	Left index finger'	68	97	-7	21	-12	-54	-9	74	-34	-18	cfh1jpivjtonbn3an3sg.txt	0.517783	0.799407	0.229534	0.0679477	0.0359014	0.0482333	0.0194584	0.00881954	0.0122122	0.00661097	0.00387068	0.00297899	0.03246	0.0671885	0.0689144	0.120986	0.550437	0.170343	0.2046	0.245263	0.492918	0.586967	0.991805	0.497392	3.79196	3.0085	2.36914	3.78845	2.88474	2.09663	3.0393	2.32553	1.75724
10	'F'	80	150	62	Left index finger'	63	94	0	10	-5	-30	-16	0	49	20	chgvq0n2had9fa0ip6og.txt	0.562809	0.717481	0.248883	0.112463	0.0479211	0.0426709	0.0422834	0.0266332	0.0107656	0.00934041	0.00656855	0.00361157	0.0137665	0.0187007	0.0198184	0.0275781	0.0477061	0.0633208	0.0388721	0.0778655	0.185137	0.205684	0.153235	0.229155	3.92258	3.40325	3.06017	2.89293	3.19271	2.54009	1.92504	1.84706	1.94463
16	'F'	78	162	51	Left index finger'	58	94	-15	29	31	-34	-35	-9	14	5	cgchpoqvjtopa61rst50.txt	0.481397	0.826596	0.350361	0.156141	0.0567465	0.0371855	0.0285491	0.0175923	0.0118941	0.00879572	0.00595506	0.00435375	0.0105478	0.016498	0.0155329	0.0312786	0.0624732	0.0357598	0.0342575	0.0284489	0.0461136	0.0964474	0.0758449	0.121773	4.19533	3.48662	2.78332	2.46699	2.63164	2.36299	2.14253	2.03846	1.86029
29.5	'F'	65	165	60	Left index finger'	87	88	-24	36	73	-22	-17	0	-23	2	cflln6qvjtonbn3bpo70.txt	0.422075	0.9054	0.450826	0.238961	0.106819	0.0808861	0.0433189	0.022553	0.013912	0.008662	0.00581752	0.00465336	0.0717781	0.122717	0.223292	0.289045	0.290815	0.295554	0.428946	0.461696	0.503385	0.521367	0.689153	0.564151	4.34661	3.74135	2.6897	2.45952	2.08209	1.7144	1.66191	2.02532	2.09205
7	'F'	63	165	60	Left index finger'	52	93	-7	10	13	-17	-1	-53	3	100	cgn7604g0t8edo0cl14g.txt	0.528942	0.717971	0.303721	0.166184	0.0900293	0.0285876	0.0267154	0.0299289	0.0215916	0.0103407	0.00642103	0.0079608	0.0664506	0.056791	0.110657	0.0781079	0.198649	0.32288	0.321175	0.287826	0.35642	0.378675	0.603873	0.470902	4.06721	3.57227	3.05691	2.54369	2.39663	2.95542	2.51069	1.72937	2.17662
5	'F'	76	164	72	Left index finger'	78	95	-13	26	39	-24	-18	22	-7	-18	cg06adf2haddiqs1u6lg.txt	0.496113	0.794448	0.374818	0.188166	0.0923928	0.0857559	0.0424486	0.0204596	0.0171858	0.00983195	0.00531322	0.00409558	0.0906107	0.15689	0.166652	0.232718	0.233566	0.238179	0.278514	0.475412	0.281325	0.3181	0.468381	0.57197	4.22101	3.63133	2.89621	3.03993	2.44771	1.56684	1.83106	1.65685	1.76075
8	'F'	67	158	51	Left index finger'	71	93	-7	22	2	-40	-29	34	0	-19	chgvrpcg0t88crmjb3p0.txt	0.525678	0.782345	0.273352	0.109189	0.0405557	0.0422176	0.0289578	0.0127722	0.0105676	0.00871214	0.0035178	0.00170145	0.0253326	0.0318025	0.040661	0.0524623	0.0405874	0.0544207	0.0663753	0.102007	0.0844166	0.0978103	0.230503	0.331832	3.9732	3.29443	2.71179	2.90055	2.86576	2.21942	1.83382	2.12729	1.72748
2	'F'	69	150	50	Right index finger'	77	97	-14	25	33	-11	-19	-19	10	-8	cfmsd6qvjtonbn3c0590.txt	0.488795	0.798268	0.348755	0.209859	0.0958837	0.0547139	0.0411438	0.0215042	0.0114066	0.00932535	0.00604505	0.00388468	0.026201	0.0325715	0.0327908	0.090781	0.127559	0.0582713	0.089158	0.132824	0.162233	0.207372	0.205855	0.310573	4.25	3.65387	3.06613	2.55477	2.54048	2.13468	1.59765	1.48168	1.3384
2	'F'	57	165	60	Right index finger'	90	96	-6	17	35	-50	59	-21	-36	52	cg8nn4kg0t8d04b7s14g.txt	0.519341	0.764992	0.363756	0.121509	0.0973758	0.0585514	0.0231609	0.0185093	0.0107896	0.0062359	0.00428665	0.00299252	0.0341745	0.0235691	0.0972127	0.142279	0.129795	0.0804358	0.0985376	0.099685	0.0977395	0.137255	0.174947	0.177802	4.13319	3.44856	2.87986	2.98055	2.21057	2.0702	1.90825	1.52204	1.49027
11	'F'	73	170	60	Right index finger'	77	97	-9	19	9	-56	9	33	-26	24	cge0kuf2had620d2g3bg.txt	0.50709	0.806365	0.270403	0.0860453	0.0405811	0.0487688	0.0222478	0.0156257	0.0131896	0.008229	0.00599451	0.00455271	0.0172871	0.0245064	0.0273736	0.0836204	0.1717	0.0526267	0.10564	0.105359	0.0665455	0.0969402	0.103593	0.135752	3.98921	3.18227	2.55076	3.54109	2.81962	2.20444	2.43262	2.19779	2.00662
7	'F'	73	158	57	Right index finger'	77	93	-24	54	47	-38	-43	-43	9	-4	chmt63v2had5ptrsf790.txt	0.441367	0.986418	0.358829	0.144712	0.0455479	0.026358	0.0199756	0.0108069	0.00568903	0.00352538	0.00277987	0.00247636	0.0492994	0.0330909	0.125892	0.08133	0.0907265	0.253743	0.205709	0.131535	0.165698	0.227274	0.184824	0.108387	4.07174	2.97872	2.10524	1.5139	1.42788	0.61755	5.26565	4.0368	3.74136
0	'F'	51	160	72	Right index finger'	76	94	0	12	0	-39	10	2	-33	12	cgglekcg0t8edo0amat0.txt	0.56609	0.722981	0.26673	0.105725	0.0548264	0.0424187	0.0191613	0.0130248	0.0164398	0.00242423	0.00113854	0.000703611	0.0590259	0.0937794	0.167791	0.308868	0.251213	0.262374	0.353166	1.0726	0.828795	0.895449	0.823516	0.81559	3.82677	3.31462	2.66125	2.96777	2.25085	1.4477	1.86286	2.59802	3.03713
28	'F'	70	158	60	Right index finger'	76	98	-12	31	5	-42	-24	48	-23	-28	cgqi40v2had7n67r85hg.txt	0.492983	0.850665	0.2882	0.117619	0.0389785	0.0478224	0.0260996	0.00944076	0.0108869	0.0074888	0.00394851	0.00311845	0.00956059	0.0168481	0.0250771	0.0853422	0.121339	0.0480501	0.155807	0.166634	0.124727	0.184278	0.218313	0.158796	4.06666	3.26586	2.58563	3.10592	2.71904	1.91368	2.07842	2.1761	1.63989
13	'F'	64	160	65	Right index finger'	77	96	-7	17	16	-36	-19	18	-16	-14	cgglic4g0t8edo0amdi0.txt	0.524086	0.760186	0.308394	0.131476	0.0571279	0.0532499	0.030034	0.0141838	0.0117036	0.00911832	0.00556149	0.00331971	0.0320579	0.0531862	0.0503022	0.0788529	0.204956	0.0823701	0.109769	0.183448	0.146247	0.149703	0.210189	0.208902	4.08729	3.4339	2.83059	3.13253	2.77988	2.12034	2.00215	2.00438	1.70649
20	'F'	69	168	70	Right index finger'	75	93	-6	27	9	-38	18	3	-26	21	cck1aa72hadcsjk3a8ag.txt	0.532515	0.815725	0.286221	0.117476	0.0771779	0.0593293	0.0294798	0.0205442	0.0161587	0.00986287	0.00647395	0.004939	0.0143471	0.0200203	0.0318051	0.0529107	0.0383981	0.0456158	0.0761849	0.0741936	0.0939191	0.152248	0.200453	0.181731	4.0884	3.53339	2.93903	3.10211	2.54379	2.1213	2.12069	1.76516	1.44897
10	'F'	71	162	88	Right index finger'	85	96	-5	19	0	-35	-51	66	7	-30	ccqle372hadc9mvgpjag.txt	0.530644	0.779137	0.264991	0.111987	0.0291934	0.0390367	0.0274736	0.0104542	0.00771059	0.00576715	0.00355969	0.00253578	0.0113304	0.0124225	0.0267415	0.0737694	0.105706	0.102284	0.0884414	0.173835	0.168079	0.267691	0.256256	0.383447	3.92717	3.27344	2.71165	2.76185	2.91627	2.14796	1.84069	2.05037	1.68278
9	'F'	81	158	59	Right index finger'	67	94	-4	13	0	-33	-32	64	3	-8	ccqlfhsg0t8fak1n5jqg.txt	0.542742	0.727726	0.267709	0.118429	0.0439819	0.0570415	0.0383983	0.0193821	0.0163784	0.0127273	0.00806918	0.00633937	0.0158568	0.0246193	0.0205299	0.0437642	0.0673978	0.0304444	0.0429046	0.0769709	0.0447103	0.0785362	0.0719872	0.0845715	4.01788	3.44715	2.89607	3.2382	3.08044	2.47496	2.32264	2.36644	2.02491
15	'F'	61	153	58	Right index finger'	60	96	-4	14	-4	-31	-42	71	40	-23	cfh1hiivjtonbn3an320.txt	0.54208	0.73853	0.248691	0.113281	0.0365645	0.0431491	0.0438638	0.0190864	0.0110824	0.0141347	0.00941426	0.00445891	0.015564	0.0199319	0.0309568	0.0503677	0.123441	0.171007	0.113738	0.14426	0.158317	0.0830379	0.131609	0.215417	3.95789	3.37085	2.90755	2.84386	3.36089	2.68274	2.02466	2.62344	2.23195
0	'F'	65	158	80	Right index finger'	61	93	-9	17	10	-27	-20	-46	100	24	cg81k3cg0t8d04b7p780.txt	0.517134	0.754934	0.29689	0.142223	0.0629458	0.025736	0.0388681	0.02699	0.0146598	0.0077186	0.00750346	0.00559956	0.0540786	0.0654219	0.0774616	0.0720552	0.307296	0.371927	0.295022	0.256467	0.441785	0.326106	0.279013	0.359783	4.06458	3.44022	2.84386	2.51853	3.4415	2.75252	2.0375	1.35195	2.19008
5	'F'	69	155	60	Right index finger'	74	95	-11	29	18	-30	-35	11	0	-15	cgc2kn2vjtopa61rp1g0.txt	0.492035	0.842606	0.322391	0.153485	0.0533055	0.0444016	0.0267091	0.0131513	0.00952794	0.00871266	0.00492115	0.00275136	0.0257302	0.0413945	0.044041	0.0856559	0.11363	0.112101	0.191258	0.269386	0.218721	0.130527	0.287755	0.323546	4.15062	3.38044	2.72839	2.63329	2.57793	1.99227	1.74379	1.95596	1.56544
16	'F'	63	157	60	Right index finger'	72	97	-6	14	10	-24	-38	22	32	-17	cgvr85n2had61ag646c0.txt	0.528524	0.716453	0.307109	0.163748	0.0528375	0.050142	0.0452784	0.0205874	0.00791253	0.00947539	0.00642358	0.00375545	0.040728	0.0544663	0.0890048	0.11982	0.208373	0.139635	0.0810103	0.198918	0.315499	0.242174	0.271668	0.265897	4.06163	3.53577	2.88289	2.54311	3.13208	2.30489	1.6069	2.04618	1.88932
0	'F'	70	172	60	Right index finger'	95	96	-6	24	14	-27	6	-9	-35	33	chgvjdcg0t88crmjb0pg.txt	0.530561	0.804413	0.306213	0.143546	0.0850826	0.0596277	0.025314	0.019333	0.0120728	0.00619835	0.00452802	0.00313122	0.0127544	0.018054	0.0417887	0.116882	0.0373006	0.0448291	0.0720264	0.0828574	0.106586	0.14083	0.166599	0.257556	4.13023	3.55537	2.921	2.9354	2.33354	1.90268	1.87885	1.47563	1.35496
18	'F'	71	166	85	Right index finger'	73	95	2	16	-8	-19	-16	-36	0	18	cgqip0v2had7n67r8he0.txt	0.577581	0.757158	0.242665	0.130251	0.0571919	0.0281294	0.0194055	0.0121875	0.00663196	0.00392683	0.00255424	0.00147232	0.0391903	0.04664	0.0714002	0.115253	0.163119	0.176755	0.198322	0.217152	0.233888	0.249067	0.395649	0.398758	3.87984	3.38447	2.90527	2.52776	2.44005	2.16754	1.83397	1.71416	1.31105
12	'F'	61	170	60	Right index finger'	105	96	0	11	-3	-54	85	-43	3	13	cg4ltmv2had4qgopll10.txt	0.56381	0.724049	0.259504	0.0768808	0.0764553	0.0341641	0.023758	0.0160468	0.0111927	0.00776569	0.00645146	0.00494387	0.0356075	0.0654011	0.0937074	0.188505	0.141741	0.402139	0.329939	0.62288	0.901575	1.03813	1.18559	1.36295	3.85124	3.18264	3.51827	2.7919	2.47852	2.72411	2.05902	1.89332	2.04575
28	'F'	70	170	65	Right index finger'	69	97	-17	37	17	-55	-79	100	-33	-64	cg9caosg0t8d04b7u500.txt	0.460249	0.896777	0.318092	0.0921677	0.0117679	0.0227443	0.00953272	0.00218775	0.0031765	0.00190597	0.00102744	0.001103	0.0187975	0.0280137	0.0282067	0.145411	0.499999	0.09266	0.3309	0.568847	0.304617	0.319859	0.543215	0.408516	3.88075	2.80076	1.67678	4.11547	2.68298	1.50221	2.67563	2.87679	2.23755
17	'F'	79	167	70	Right index finger'	75	95	-12	27	28	-50	8	2	-29	28	cfu98kavjtonbn3d3svg.txt	0.507491	0.813924	0.316805	0.110345	0.0616818	0.0489971	0.02467	0.0164297	0.0125932	0.00824329	0.00635217	0.00445232	0.033727	0.0490041	0.087215	0.115069	0.17836	0.183121	0.199537	0.20448	0.241729	0.450845	0.618223	0.740109	4.11392	3.36837	2.69279	3.0033	2.52346	2.29188	2.42505	1.78354	1.73649
33	'F'	69	162	75	Right index finger'	70	95	-53	79	100	-2	12	-18	-4	23	cfpeohqvjtonbn3cc6j0.txt	0.281209	1.1414	0.787436	0.49419	0.284607	0.163734	0.10238	0.0806535	0.0688952	0.0531262	0.036676	0.0258083	0.0504374	0.0265085	0.0284847	0.0660408	0.129597	0.166017	0.0758902	0.0777046	0.0506832	0.0938384	0.17139	0.0944612	4.97954	4.24613	3.50317	2.95434	2.61039	2.45288	2.24599	1.85886	1.40824
12	'F'	55	150	80	Right index finger'	89	93	-7	21	25	-41	-4	3	-39	-6	chcbd2n2had1tg086f60.txt	0.525212	0.78501	0.336277	0.130664	0.0705429	0.0562142	0.0218902	0.0115661	0.00905507	0.00415755	0.00256129	0.00189207	0.00694968	0.0111219	0.0216795	0.0425183	0.0268835	0.034842	0.0792064	0.0998915	0.0817295	0.176737	0.163318	0.252473	4.07071	3.42454	2.69988	2.86979	2.12951	1.49219	1.74594	1.34822	0.917893
13	'F'	67	160	75	Right index finger'	66	98	-14	26	30	-22	-30	-33	41	18	cfmsfgqvjtonbn3c06j0.txt	0.49114	0.811624	0.33701	0.172558	0.0645149	0.0348478	0.0321982	0.020477	0.00920108	0.0057645	0.00462629	0.00290407	0.065066	0.107889	0.075481	0.129115	0.188376	0.153009	0.123738	0.153748	0.255178	0.251869	0.262101	0.266439	4.13639	3.51	2.83911	2.27807	2.64015	2.26324	1.69763	1.45472	1.70745
0	'F'	67	168	85	Right index finger'	80	97	-4	11	18	-54	-8	12	-33	25	cg0r35v2haddiqs2090g.txt	0.540208	0.719771	0.313892	0.095679	0.0480037	0.0418803	0.0185295	0.0128042	0.0093291	0.00494072	0.00277283	0.00200581	0.0169904	0.0278892	0.0215479	0.0558809	0.0442637	0.0513388	0.096025	0.076651	0.081033	0.146575	0.21819	0.268056	3.9351	3.3199	2.57522	3.15525	2.52834	2.08891	2.29115	2.00427	1.63783
0	'F'	67	160	60	Right index finger'	71	94	-6	11	29	-15	-10	-15	4	17	cg4m38sg0t8d04b7bq9g.txt	0.534995	0.664651	0.356425	0.173856	0.0980158	0.054825	0.0472011	0.0239545	0.0207749	0.011378	0.0104352	0.00551305	0.0427059	0.200254	0.166483	0.207687	0.670341	0.241683	0.724541	0.26001	0.886561	0.17211	1.18212	0.292034	4.1128	3.72882	3.04294	2.83407	2.65017	2.253	1.94609	1.70647	1.41183
25.5	'F'	58	170	57	Right index finger'	79	99	-2	8	20	-37	-34	18	-17	-3	cfusf672haddiqs1qmlg.txt	0.54907	0.711774	0.301279	0.121345	0.0487838	0.0414402	0.0220917	0.012895	0.00818269	0.00495278	0.00305987	0.00212516	0.0483779	0.110676	0.238196	0.152752	0.683662	0.143037	0.259679	0.703545	0.807241	1.43718	1.40554	1.99067	3.87971	3.41702	2.53279	3.0015	2.48731	1.81773	1.7719	1.50082	1.38426
10	'F'	69	160	65	Right index finger'	53	95	0	10	0	-21	-10	-7	31	38	chgvb3kg0t88crmjatu0.txt	0.580102	0.687457	0.26122	0.138932	0.071367	0.0503209	0.0434962	0.0344118	0.0227541	0.016634	0.0145989	0.0121616	0.018612	0.0431722	0.0198448	0.0540549	0.0991493	0.0755969	0.0487479	0.0724083	0.0934192	0.0882934	0.0604088	0.0914489	4.05042	3.70938	3.32073	3.04665	3.04411	2.87301	2.53448	2.25532	2.17778
10	'F'	71	158	60	Right index finger'	65	94	-11	26	30	-34	-13	14	-5	-10	cgvs7tf2had61ag64nf0.txt	0.501395	0.815858	0.353101	0.152499	0.0734062	0.0648723	0.0410634	0.0205158	0.0145003	0.0120255	0.00774651	0.00458422	0.0125276	0.0200805	0.0289272	0.0724455	0.0637291	0.0666615	0.087352	0.12193	0.0696058	0.0869994	0.130518	0.140792	4.23634	3.63015	2.93414	2.95855	2.64807	2.12631	1.82749	1.88001	1.60346
17	'F'	55	160	60	Right index finger'	73	97	0	12	-6	-8	-19	14	19	-2	cg82774g0t8d04b7pdl0.txt	0.570528	0.713283	0.25332	0.153537	0.0664907	0.0611681	0.0470834	0.0255002	0.0174168	0.0138359	0.00978749	0.00664379	0.028898	0.0455228	0.0650649	0.129791	0.16756	0.0956907	0.14556	0.279862	0.288059	0.258236	0.291527	0.428798	4.01736	3.62328	3.1136	3.0901	3.03052	2.3834	1.97737	2.0261	1.76769
0	'F'	56	164	75	Right index finger'	51	98	-10	24	12	-28	-31	-4	60	14	chmt1gkg0t8fl7e726rg.txt	0.501331	0.80488	0.310892	0.151997	0.0598029	0.0405114	0.044242	0.0295244	0.0127516	0.0101722	0.00959566	0.0060458	0.0291828	0.0442513	0.0370996	0.0448957	0.0866758	0.0469292	0.0367275	0.0731124	0.126076	0.0562347	0.0499852	0.130197	4.15905	3.55216	3.01935	2.57915	2.99822	2.58868	1.9653	1.75041	2.0159
0	'F'	68	169	60	Right index finger'	70	98	-1	12	3	-24	-31	29	-2	-15	cgptii72had7n67qvbf0.txt	0.558491	0.723648	0.265831	0.134254	0.0477827	0.0495989	0.0333351	0.0149561	0.0119883	0.00983822	0.00584699	0.00385126	0.0191675	0.0248334	0.0411071	0.0702434	0.0698652	0.0590054	0.114424	0.147833	0.0924878	0.112056	0.190305	0.135916	3.9605	3.52321	2.88277	2.87827	2.96503	2.32973	1.9718	2.2	1.87921
0	'F'	81	160	65	Right index finger'	80	96	-6	22	4	-40	16	16	-33	1	chgvif4g0t88crmjb0cg.txt	0.5376	0.760186	0.272795	0.121266	0.0657157	0.0630552	0.0309904	0.0157939	0.0146873	0.00882383	0.00523084	0.00459998	0.0544358	0.126292	0.0807779	0.394803	0.0927605	0.271767	0.364371	0.283837	0.477869	0.540428	0.694786	1.09303	4.05591	3.39158	2.82436	3.14407	2.6515	2.0577	2.16719	1.86335	1.46432
3	'F'	60	157	60	Right index finger'	69	94	-6	21	0	-40	-20	36	4	-12	cfs7vuqvjtonbn3cqb30.txt	0.535141	0.771448	0.262931	0.103965	0.0449941	0.0460022	0.0331207	0.0161727	0.0127586	0.0106182	0.00667756	0.00455161	0.0067771	0.0114165	0.0108491	0.0232129	0.0393611	0.0286543	0.0339767	0.0491221	0.0478467	0.0484711	0.0674026	0.0959095	3.99978	3.33882	2.93476	3.02737	2.98614	2.43531	2.15173	2.24006	1.93568
18	'F'	72	160	65	Right index finger'	76	91	-8	6	36	-6	-26	-14	6	-9	chb0j7sg0t889ug9ol3g.txt	0.493374	0.692954	0.392825	0.243131	0.105043	0.0676714	0.0455628	0.024074	0.0141597	0.008064	0.00457531	0.00296374	0.0458079	0.0494672	0.0874808	0.0777056	0.19137	0.223209	0.224511	0.329916	0.437317	0.545917	0.854076	0.750566	4.13515	3.7447	2.90688	2.47486	2.24665	1.59109	0.936764	0.660275	3.03964
7	'F'	78	166	71	Right index finger'	63	94	-19	48	43	10	-23	12	30	23	cca1ekn2hadcsjhio880.txt	0.477447	0.882412	0.332556	0.255264	0.104014	0.0903548	0.0817182	0.055433	0.0411269	0.0344021	0.0269925	0.0203516	0.046253	0.0528818	0.0717123	0.106108	0.0642516	0.0670272	0.0582179	0.110948	0.063408	0.0750583	0.113146	0.147415	4.4151	4.20089	3.42203	3.1853	3.16722	2.78415	2.35099	2.18602	1.9336
15	'F'	79	158	80	Right index finger'	59	88	-6	15	7	-25	-30	-10	56	12	chgveo4g0t88crmjav3g.txt	0.53095	0.739859	0.292645	0.142259	0.0573219	0.0388893	0.0359426	0.0230085	0.0128897	0.0102146	0.00830034	0.00588172	0.0736572	0.104618	0.0637457	0.167602	0.242056	0.130214	0.202406	0.192068	0.285293	0.317841	0.301179	0.355491	4.08908	3.51781	2.95702	2.54785	3.02028	2.64841	2.13755	2.01691	2.07205
31	'F'	83	160	58	Right index finger'	59	96	-30	47	100	-16	-16	-21	42	40	cc87034g0t8e9qh5f3tg.txt	0.404508	0.917316	0.531152	0.282695	0.129256	0.0838722	0.0809873	0.0612198	0.0371529	0.0259175	0.0231398	0.0190997	0.139231	0.116077	0.149532	0.185192	0.120868	0.219355	0.245109	0.201088	0.160098	0.291497	0.333147	0.276762	4.67596	3.96676	3.29427	2.88588	2.94584	2.71041	2.19487	1.81591	1.77156
21	'F'	73	168	66	Right index finger'	60	98	-7	19	-2	-38	-31	81	11	-25	chcb8esg0t87qvpjlglg.txt	0.529496	0.751309	0.267989	0.11247	0.0510779	0.050483	0.0376038	0.0192552	0.015316	0.0103586	0.00581098	0.00487621	0.0603643	0.115671	0.116589	0.21395	0.346732	0.302219	0.215111	0.634092	0.433143	0.369024	0.520338	0.605586	4.00005	3.34622	2.85685	3.14133	3.00556	2.24276	2.02466	2.15003	1.64625
9	'F'	57	156	71	Right index finger'	76	99	-4	19	11	-26	14	37	-27	-2	ccaqicn2hadcsjhir1b0.txt	0.541071	0.774722	0.299724	0.143911	0.0920987	0.0955513	0.0454432	0.0259647	0.026362	0.0142605	0.0102074	0.00821189	0.0433678	0.0806283	0.0631333	0.125688	0.0977015	0.109589	0.18688	0.165999	0.136828	0.187684	0.189006	0.203474	4.16993	3.70307	3.12753	3.40918	2.76193	2.07047	2.37138	1.8938	1.44515
32.5	'F'	83	158	50	Right index finger'	82	87	-6	17	15	-9	-37	-3	0	-26	ccaqfk72hadcsjhir0d0.txt	0.535062	0.749043	0.308803	0.175983	0.0613618	0.0478556	0.0309863	0.0134162	0.00793699	0.00511293	0.00281253	0.00192857	0.0448666	0.0644225	0.0996741	0.199839	0.122852	0.224275	0.145839	0.215513	0.235045	0.332077	0.463813	0.602952	4.03033	3.54495	2.76628	2.76483	2.52405	1.76178	1.45626	1.47808	1.13022
3	'F'	66	155	60	Right index finger'	57	93	-8	19	16	-22	-28	-24	43	11	chgvd2f2had9fa0ious0.txt	0.519504	0.768238	0.305802	0.156481	0.0625529	0.0334168	0.0328887	0.0215481	0.00903911	0.0065981	0.00627533	0.00388546	0.0254391	0.0346617	0.0337308	0.0287787	0.0697753	0.0596166	0.0977667	0.0908247	0.109282	0.184814	0.11944	0.147942	4.08469	3.50805	2.9359	2.44823	2.72395	2.4374	1.86463	1.56459	2.00677
0	'F'	53	165	75	Right index finger'	81	96	-5	20	1	-36	-50	36	-13	-15	cg4lqksg0t8d04b7bo90.txt	0.533338	0.777737	0.267985	0.110776	0.0270904	0.0312018	0.0184567	0.00776507	0.00855018	0.00643394	0.00336643	0.00244116	0.0131067	0.0178909	0.0417853	0.129849	0.194221	0.0809189	0.133873	0.252841	0.115309	0.143877	0.195725	0.275777	3.88144	3.24727	2.47907	2.88887	2.78898	2.09768	2.42991	2.2538	1.75268
6	'F'	60	160	75	Right index finger'	70	97	-3	8	21	-12	-17	14	8	17	chmsv2kg0t8fl7e725f0.txt	0.547892	0.688338	0.316759	0.185259	0.0793143	0.076899	0.0542501	0.034148	0.0269109	0.0191705	0.0154173	0.0114294	0.0485068	0.164735	0.0798187	0.171047	0.172235	0.368916	0.177137	0.156469	0.294525	0.0834708	0.464141	0.468794	4.21229	3.84525	3.21749	3.08058	3.056	2.58268	2.31853	2.1506	1.88331
2	'F'	74	149	75	Right index finger'	71	91	-2	19	-10	-39	-54	58	26	-26	cc7k0bf2hadcsjhigek0.txt	0.54595	0.773428	0.239694	0.0931985	0.0215625	0.0295081	0.0250277	0.01007	0.00473447	0.00458476	0.00268207	0.00115867	0.00864109	0.0134414	0.013719	0.0294797	0.0835191	0.0481036	0.0503586	0.109284	0.144391	0.119681	0.205534	0.395957	3.80975	3.11124	2.63225	2.58314	3.10986	2.34898	1.80316	2.1207	2.01428
13	'F'	81	150	67	Right index finger'	73	90	-5	19	4	-38	-40	-3	-8	-17	cg81v3n2had4qgoq6t80.txt	0.538853	0.76381	0.272331	0.104584	0.0350766	0.0297599	0.0167436	0.00712532	0.00456802	0.00325381	0.0019238	0.00123279	0.0121215	0.0184596	0.0345991	0.13	0.0715275	0.102541	0.10685	0.15311	0.276131	0.31802	0.461018	0.356063	3.8721	3.19698	2.55053	2.79113	2.59727	2.13263	2.18545	2.19012	1.92958
29	'F'	72	155	70	Right index finger'	89	100	-6	10	30	-29	-64	100	-13	-46	cghvkj4g0t8edo0b5nq0.txt	Inf	0.683768	0.406635	0.199086	0.0571909	0.0905096	0.0602211	0.0225692	0.0196994	0.018144	0.0204816	0.0327492	NaN	0.115399	0.172907	0.224334	0.644454	0.302423	0.360488	0.752386	0.98103	1.68257	3.34628	4.55604	4.02355	3.69867	2.70897	3.04339	2.37119	2.18749	2.13166	2.29563	1.85874
7	'F'	46	164	65	Right index finger'	102	97	1	9	11	-46	47	-10	-51	24	cg06cmqvjtonbn3dcnhg.txt	0.590343	0.685611	0.283168	0.103315	0.0849201	0.0613771	0.0204511	0.0140008	0.00948385	0.00545299	0.00428397	0.00280802	0.045808	0.0742229	0.119526	0.266037	0.148635	0.310467	0.463868	0.330674	0.393344	0.651682	0.397285	0.478109	3.844	3.51283	3.02023	3.05413	2.05029	1.99774	2.11792	1.68248	1.92314
32.5	'F'	69	156	65	Right index finger'	74	93	-7	21	29	-33	2	13	-21	-8	ccaqgh72hadcsjhir0ig.txt	0.524989	0.773474	0.343808	0.148249	0.0846419	0.0740547	0.0380496	0.0197265	0.0160818	0.0102747	0.00546865	0.00410369	0.00952935	0.0176244	0.0198872	0.0587923	0.0450807	0.0315946	0.0658499	0.0608937	0.0654972	0.10586	0.113026	0.110782	4.19368	3.61959	2.9492	3.04449	2.53702	1.95877	1.94506	1.74505	1.41088
13	'F'	77	160	64	Right index finger'	69	97	-13	29	22	-43	2	42	-28	-8	cgc2j2ivjtopa61rp0j0.txt	0.495201	0.807663	0.332883	0.135773	0.0642728	0.0830986	0.0424141	0.0193081	0.0244082	0.0148951	0.0100426	0.00846242	0.0494793	0.202361	0.100448	0.443141	0.269709	0.282661	0.611148	0.637468	0.50327	0.3627	1.25454	0.815857	4.16661	3.44591	2.81426	3.5067	2.66247	1.72751	2.32866	1.84421	1.29138
19	'F'	77	157	60	Right index finger'	60	91	-10	26	-1	-37	-37	39	23	-11	cbksr1sg0t87cj2oks9g.txt	0.513439	0.813097	0.269235	0.109313	0.0386677	0.0414562	0.0339198	0.0156018	0.00951777	0.00980696	0.00517776	0.00237203	0.0299556	0.0400646	0.0419944	0.0666296	0.0705442	0.0948796	0.0602105	0.15998	0.189997	0.15255	0.214175	0.407962	4.02213	3.29472	2.77747	2.75392	2.97924	2.38487	1.85539	2.1111	1.87224
16	'F'	68	170	60	Right index finger'	61	92	-14	28	36	-32	-27	0	-4	-14	chd0c1sg0t88crmijuj0.txt	0.487941	0.824097	0.361279	0.158653	0.0624344	0.0501736	0.0314283	0.0147805	0.011543	0.00818821	0.00435458	0.00280768	0.00907365	0.0159846	0.011299	0.0130081	0.0288867	0.0588792	0.0517119	0.0689193	0.105388	0.100499	0.119144	0.201691	4.1983	3.50934	2.78369	2.62429	2.49982	1.96681	1.82629	1.86829	1.46282
1	'F'	88	160	70	Right index finger'	89	99	-4	17	15	-29	-11	-12	-3	11	cfi910qvjtonbn3b05lg.txt	0.545857	0.757291	0.292732	0.134674	0.0663141	0.0433317	0.0279366	0.0175763	0.0118813	0.00895294	0.00628556	0.00433325	0.025895	0.0330173	0.0387724	0.176518	0.177007	0.148821	0.245855	0.245856	0.241917	0.266083	0.440956	0.495187	4.09798	3.60491	3.06476	2.79543	2.70242	2.35288	2.16408	2.11644	1.90464
26	'F'	60	162	56	Right index finger'	74	97	0	9	-7	-16	1	40	-6	-21	cbkt8dcg0t87cj2okv20.txt	0.566043	0.718322	0.251224	0.137247	0.0725653	0.0775489	0.0488685	0.0218034	0.0204625	0.0166485	0.00982795	0.0071841	0.0249177	0.0327599	0.0418421	0.0500553	0.0465686	0.0321966	0.0643522	0.0811783	0.0887742	0.09958	0.116605	0.116024	4.04839	3.643	3.16724	3.36385	3.00134	2.29527	2.10346	2.18012	1.75639
11	'F'	66	163	58	Right index finger'	63	96	-4	21	-16	-55	-79	100	-8	-49	cfh1k9qvjtonbn3an44g.txt	0.535932	0.79885	0.22921	0.0650261	0.00795281	0.0293991	0.0176388	0.0044263	0.00459762	0.0059502	0.00302891	0.0018061	0.015424	0.0164285	0.0315662	0.0833999	0.402961	0.097764	0.168156	0.344106	0.336794	0.256207	0.389898	0.48083	3.68797	2.83982	2.19296	3.58677	3.34658	2.35509	1.70197	3.01776	2.59063
9	'F'	43	170	50	Right index finger'	73	88	-9	19	18	-37	-56	94	-10	-28	chlhes4g0t8fl7e6m2f0.txt	0.512334	0.761937	0.319801	0.136463	0.033568	0.049055	0.0301186	0.0117127	0.0102648	0.00751297	0.00366342	0.00198458	0.00808036	0.0114419	0.0245535	0.0374625	0.0821643	0.0535313	0.0928218	0.11284	0.129191	0.148123	0.269307	0.45489	4.02787	3.42534	2.60059	2.89251	2.88449	2.03079	1.79287	1.92089	1.42933
0	'F'	69	160	52	Right index finger'	57	99	-10	24	3	-44	-61	75	69	-11	chmsvpn2had5ptrsf46g.txt	0.502145	0.807612	0.282789	0.10683	0.0238032	0.0274044	0.0318706	0.0161857	0.00711378	0.00951292	0.00653037	0.0028894	0.0187823	0.0213555	0.0344118	0.051933	0.11482	0.0616529	0.0401457	0.115471	0.0999786	0.0758879	0.126082	0.266634	3.97596	3.19649	2.53142	2.27418	3.48533	2.75112	1.98996	2.4232	2.23393
10	'F'	68	166	64	Right index finger'	61	97	-13	25	29	-22	-14	-46	42	18	cdgc6okg0t8bqalc59p0.txt	0.489442	0.808361	0.348066	0.177906	0.0817089	0.0352574	0.0339533	0.0216014	0.00966592	0.00639436	0.00485829	0.00261706	0.0208475	0.0312057	0.0305627	0.0403207	0.109843	0.070757	0.0686384	0.109611	0.172336	0.156249	0.164454	0.247912	4.20073	3.49339	2.96479	2.36667	2.43087	2.19792	1.5932	1.19676	1.31898
13	'F'	88	160	70	Right index finger'	94	94	-13	41	27	-27	-1	-11	6	17	cfga9iavjtonbn3ahckg.txt	0.51947	0.845786	0.298614	0.148142	0.0799558	0.0532216	0.0367957	0.0253657	0.0177282	0.0132789	0.00930745	0.0058222	0.0769479	0.0880472	0.0981114	0.212376	0.23858	0.126881	0.201406	0.31226	0.32652	0.335076	0.439857	0.773605	4.08091	3.58507	3.03108	2.84105	2.56468	2.17371	1.9275	1.69499	1.40903
0	'F'	52	163	85	Right index finger'	63	98	-14	27	29	-17	-20	-43	100	24	cfs814avjtonbn3cqbc0.txt	0.490565	0.781346	0.34513	0.189928	0.0865897	0.0416576	0.0481363	0.0356392	0.0152513	0.00893237	0.00868998	0.00600095	0.0625817	0.109423	0.0818471	0.130974	0.352668	0.260933	0.198998	0.185522	0.448985	0.345972	0.274109	0.384653	4.19218	3.56519	3.07469	2.40156	2.87596	2.47127	1.66259	1.13659	1.68022
8	'F'	70	158	58	Right index finger'	49	93	-14	24	29	-22	0	-46	76	75	cgchtd4g0t8d04b8gvm0.txt	0.480215	0.800445	0.347452	0.179713	0.0963726	0.0396283	0.047341	0.0470429	0.0288806	0.0110201	0.010213	0.0115817	0.0301923	0.048728	0.0327984	0.0308023	0.0269233	0.0311344	0.0303738	0.0363542	0.0490989	0.099032	0.0805867	0.0721651	4.29792	3.69074	3.2018	2.72701	2.74503	2.9702	2.35679	1.65557	1.39738
12	'F'	67	166	50	Right index finger'	58	96	-20	35	47	-22	-9	-30	45	61	cgptks72had7n67qvcqg.txt	0.456117	0.860133	0.385656	0.20081	0.100998	0.0523268	0.050138	0.0458178	0.0332095	0.0207435	0.0143033	0.0115389	0.0447999	0.0574861	0.0636454	0.0592386	0.0764776	0.0983039	0.0943741	0.0824177	0.0828482	0.109718	0.156508	0.200912	4.39518	3.74592	3.22703	2.79455	2.82067	2.79812	2.35094	1.84317	1.47444
18	'F'	78	150	55	Right index finger'	64	94	-15	34	12	-36	-58	29	37	-1	chb0n6f2had61aganqp0.txt	0.482357	0.876175	0.280332	0.117296	0.0199674	0.0258144	0.0256513	0.0132663	0.00328204	0.00442701	0.00373559	0.001996	0.0199466	0.0218985	0.0268549	0.0574361	0.332422	0.143459	0.0621635	0.174082	0.234797	0.160945	0.213846	0.371714	4.00086	3.15034	2.42205	1.83251	3.13014	2.38784	1.59039	1.56676	2.28674
1	'F'	72	160	70	Right index finger'	72	93	-8	22	7	-38	-52	55	2	-14	cfh1dpivjtonbn3an10g.txt	0.515803	0.788279	0.28275	0.110707	0.0256579	0.0378549	0.0245297	0.0116596	0.0101904	0.0079257	0.00508496	0.00359505	0.00998562	0.0174155	0.0215605	0.0581506	0.102199	0.0507053	0.101595	0.111525	0.0924967	0.0912748	0.148367	0.245805	3.9669	3.27409	2.55903	2.86367	2.9566	2.29264	2.20305	2.23939	1.90119
6	'F'	58	155	58	Right index finger'	57	96	-10	24	27	-7	-26	-8	35	14	chirjjv2had9fa0jbmsg.txt	0.523877	0.758248	0.334526	0.192661	0.0772176	0.0584185	0.0506694	0.0300768	0.0155547	0.0129338	0.0104968	0.00724555	0.0327871	0.0470812	0.0386725	0.0756128	0.123681	0.0878055	0.106537	0.204039	0.223638	0.171275	0.184765	0.262773	4.19513	3.8748	3.13408	2.77784	2.85133	2.4053	1.88028	1.76392	1.85944
8	'F'	64	160	70	Right index finger'	74	94	-6	19	8	-33	-29	52	-23	-27	cgj91hcg0t8edo0bitdg.txt	0.528812	0.771432	0.290777	0.125943	0.0513852	0.0593531	0.0286582	0.0121559	0.0134767	0.00747476	0.00377763	0.00296512	0.0102549	0.014989	0.0291986	0.0407665	0.0562736	0.0385049	0.062178	0.0914381	0.0517671	0.105689	0.168777	0.251955	4.03247	3.47291	2.68657	3.22131	2.66406	1.95257	2.19166	2.01266	1.53999
32	'F'	74	155	55	Right index finger'	68	94	0	15	-6	-41	-44	13	-7	-33	cfe8vpsg0t8desl5tgh0.txt	0.558588	0.744688	0.252584	0.0961347	0.0284309	0.025755	0.0156483	0.00593119	0.00418728	0.00370962	0.00226306	0.00106928	0.0120035	0.0145126	0.0203721	0.0463779	0.0559136	0.0565136	0.0658408	0.161553	0.208818	0.200114	0.2375	0.314266	3.775	3.1623	2.51429	2.80067	2.77733	2.23998	2.0591	2.36257	2.07827
10	'F'	73	161	80	Right index finger'	61	98	-7	21	12	-18	-9	-5	36	21	cfusdrv2haddiqs1qmeg.txt	0.528746	0.77268	0.294243	0.150547	0.0698352	0.0513567	0.0462959	0.0331428	0.0180954	0.0130776	0.0110754	0.00686125	0.0408875	0.0608617	0.0622471	0.0797899	0.119412	0.101165	0.1251	0.179253	0.139188	0.213725	0.245605	0.253713	4.13941	3.59098	3.20014	2.84616	3.06973	2.54236	1.97973	1.82074	1.8268
15	'F'	63	158	70	Right index finger'	67	96	-8	21	18	-12	-17	6	33	1	cg7dvqf2had4qgoq45ag.txt	0.514412	0.774161	0.33154	0.199357	0.0965012	0.0697647	0.0644353	0.0398525	0.0188528	0.0139802	0.0115231	0.00677692	0.0308638	0.0437506	0.0613978	0.0868245	0.121425	0.170506	0.153723	0.158184	0.166396	0.211168	0.168847	0.213922	4.26337	3.71185	3.2494	2.83805	2.91959	2.39843	1.73858	1.54184	1.53627
0	'F'	58	160	72	Right index finger'	68	92	-18	39	61	-33	-1	63	-6	-22	ch3r8o4g0t889ug97af0.txt	0.450218	0.961765	0.432556	0.18585	0.123369	0.113031	0.0779739	0.0466312	0.0377885	0.0270581	0.0194303	0.0155664	0.136519	0.24733	0.150344	0.254466	0.28649	0.270419	0.28916	0.399168	0.317141	0.262829	0.499937	0.676656	4.35018	3.47063	2.7208	3.25723	2.74921	2.28917	2.89513	3.02386	2.33858
12	'F'	58	164	76	Right index finger'	75	95	-18	15	59	-3	-28	32	-11	-10	cbpg3savjtoqui5skpt0.txt	0.454614	0.745363	0.431375	0.279675	0.10734	0.109817	0.0641296	0.032372	0.0267149	0.0186101	0.0128888	0.00913182	0.0211752	0.0304617	0.0239625	0.0588464	0.0280974	0.0220506	0.0600406	0.0375208	0.0395002	0.052408	0.0515694	0.0511092	4.44293	4.05562	3.08884	3.09839	2.86089	2.16645	2.02466	1.85914	1.58697
21	'F'	69	160	59	Right index finger'	70	97	-3	13	0	-21	-21	56	33	-7	cc23o6avjtoqui5tp2f0.txt	0.550812	0.715824	0.260765	0.135826	0.0600609	0.0695685	0.0618526	0.0323106	0.0201255	0.0226579	0.016272	0.0103426	0.051395	0.0626521	0.0557404	0.144739	0.276813	0.139681	0.159916	0.311065	0.28861	0.232419	0.342619	0.383741	4.10895	3.65262	3.42726	3.28437	3.38673	2.77255	2.18692	2.395	2.20943
0	'F'	89	160	55	Right index finger'	80	96	-8	22	5	-44	-1	47	-27	-16	cc23mlavjtoqui5tp230.txt	0.512958	0.792485	0.27927	0.101946	0.0516544	0.0608521	0.02945	0.0129984	0.0139857	0.00838845	0.00470489	0.00413345	0.00957288	0.0161987	0.0187398	0.0856058	0.088614	0.0374259	0.102982	0.107043	0.0813205	0.114774	0.162742	0.200563	4.03521	3.30027	2.74147	3.36429	2.77814	2.04905	2.2589	2.0416	1.61972
17	'F'	81	150	40	Right index finger'	58	99	-6	16	3	-31	-34	-15	87	25	cb7mmtqvjtoh3rj00db0.txt	0.528886	0.747749	0.27585	0.125688	0.0456332	0.0291363	0.0357806	0.0251933	0.0124598	0.0108299	0.00983226	0.00615895	0.0091848	0.0177021	0.0138397	0.030082	0.0616119	0.067011	0.0423618	0.0761902	0.089646	0.135385	0.119446	0.198444	4.02408	3.39822	2.87373	2.60581	3.27908	2.90987	2.31183	2.15587	2.33256
18	'F'	64	175	60	Right index finger'	70	95	-14	20	32	-1	-17	-44	23	21	cb7mo5cg0t87cj2nn1h0.txt	0.486431	0.784482	0.340204	0.229617	0.106341	0.0422178	0.0362225	0.025513	0.0139092	0.00707765	0.00569578	0.00321981	0.0421616	0.0696482	0.10583	0.10678	0.131717	0.147217	0.0806736	0.0860766	0.17856	0.258687	0.248758	0.379343	4.21765	3.72684	3.0798	2.42569	2.35458	2.18915	1.69987	1.40283	1.36441
19	'F'	57	158	58	Right index finger'	60	92	-11	25	21	-26	-38	39	23	-21	cgchvbsg0t8d04b8h0v0.txt	0.499832	0.808574	0.323609	0.157069	0.0531072	0.0569817	0.0473089	0.020738	0.0136007	0.0137339	0.00806852	0.00440133	0.0165777	0.0218452	0.0243449	0.0224911	0.0338566	0.0475894	0.0350333	0.0698395	0.0802655	0.0488868	0.0840029	0.122188	4.19365	3.55557	2.92737	2.73715	2.93996	2.25735	1.79451	2.14461	1.74934
9	'F'	77	154	69	Right index finger'	78	95	-28	51	91	-33	-8	-17	-8	6	cg2060cg0t8d04b71er0.txt	0.374509	1.04809	0.544055	0.2546	0.122094	0.0747771	0.0473064	0.0272767	0.014997	0.0087938	0.00647106	0.00557283	0.0294216	0.0550664	0.0443158	0.0812364	0.0795749	0.112118	0.121534	0.185111	0.201985	0.217426	0.227316	0.213149	4.56994	3.67812	2.91703	2.52172	2.18917	1.78986	1.41277	1.14583	1.05412
0	'F'	76	155	55	Right index finger'	71	97	-4	18	-8	-48	-19	29	-18	-19	cfi8ekavjtonbn3avrh0.txt	0.538211	0.761175	0.244171	0.0784516	0.0382541	0.0371832	0.0207576	0.0088859	0.00950116	0.00695585	0.00367298	0.00431008	0.0341436	0.0565412	0.0895632	0.209485	0.145163	0.169708	0.265671	0.363379	0.29671	0.389278	0.504162	0.608581	3.81859	3.05878	2.56216	3.18942	2.76215	2.14066	2.51404	2.4432	1.89957
15	'F'	69	160	60	Right index finger'	69	96	2	17	-19	-46	-49	26	31	3	chgvr1sg0t88crmjb3f0.txt	0.583257	0.759533	0.211265	0.0732316	0.0193656	0.0203852	0.0178057	0.0100985	0.00401431	0.00356228	0.00299347	0.00189749	0.0213245	0.0277807	0.0539619	0.118749	0.310586	0.228823	0.141173	0.154895	0.378421	0.219439	0.233376	0.465517	3.65678	3.01487	2.61302	2.60528	3.26606	2.74877	2.16474	2.39107	2.63016
11	'F'	69	158	75	Right index finger'	74	96	-5	20	-11	-50	-17	53	-36	2	cgvsapcg0t889ug8scag.txt	0.536027	0.778778	0.236159	0.0758662	0.0353733	0.0400386	0.0159027	0.0100383	0.00895721	0.00385154	0.0025652	0.0020603	0.0175893	0.0279413	0.0211937	0.0712075	0.0869977	0.0524231	0.156923	0.10915	0.0958676	0.159812	0.276574	0.331136	3.82496	3.09593	2.50632	3.33489	2.75132	2.00789	2.62019	2.06301	1.67152
9	'F'	77	173	55	Right index finger'	62	98	-8	19	2	-34	-40	53	57	-3	cgvqoqv2had61ag63sqg.txt	0.504833	0.78531	0.27606	0.113987	0.0349897	0.0437944	0.048023	0.0260251	0.0117542	0.0115704	0.00821084	0.00480314	0.0364199	0.0675934	0.0508528	0.143901	0.25803	0.233012	0.0502647	0.195458	0.250432	0.0948567	0.153173	0.244149	4.05526	3.3324	2.79754	2.58008	3.54558	2.6891	1.93299	2.10024	2.14928
10	'F'	60	158	72	Right index finger'	67	91	-6	24	7	-34	-25	-28	9	22	cg81jcsg0t8d04b7p720.txt	0.529042	0.806005	0.288308	0.128487	0.0547016	0.0293045	0.0216165	0.0155393	0.00960562	0.00557705	0.00329053	0.00200257	0.0184025	0.0194914	0.0164148	0.0371464	0.110635	0.0970883	0.0707919	0.0830383	0.135624	0.241649	0.23995	0.401866	3.9812	3.3576	2.74492	2.4089	2.37779	2.11589	1.70023	1.24228	0.739756
39	'F'	64	163	65	Right index finger'	78	97	-7	22	10	-31	-42	38	-25	-41	cc3cten2hadcsjhi2c00.txt	0.528633	0.782678	0.291965	0.130889	0.0422103	0.0450083	0.0222228	0.00736901	0.0063987	0.0036218	0.002892	0.00195381	0.0177504	0.0202205	0.0427955	0.100855	0.111303	0.0718923	0.143294	0.369779	0.448815	0.3835	0.573798	0.454513	3.97314	3.40513	2.56626	2.81682	2.40208	1.59113	1.84584	2.00606	1.53708
0	'F'	63	160	55	Right index finger'	90	93	-8	23	21	-44	1	11	-38	27	cfqo8javjtonbn3ci6c0.txt	0.518571	0.795025	0.32272	0.121024	0.0642304	0.057789	0.0239089	0.0165812	0.0140796	0.00781867	0.00529112	0.00390725	0.012119	0.0144169	0.0401425	0.0868472	0.050088	0.0537304	0.12799	0.0780898	0.0574162	0.0896835	0.159633	0.163744	4.10915	3.47001	2.75609	3.02595	2.49402	2.02441	2.20953	1.7529	1.4428
0	'F'	58	160	80	Right index finger'	69	95	-12	35	4	-38	-33	-10	37	31	cgn76k4g0t8edo0cl1d0.txt	0.502724	0.851172	0.275068	0.115829	0.0402959	0.0212728	0.0207427	0.0163789	0.0134042	0.0125723	0.0121351	0.0110599	0.0383853	0.0491275	0.0684143	0.0978024	0.23731	0.270312	0.322613	0.392938	0.463121	0.327626	0.205623	0.153241	4.07319	3.30671	2.76829	2.39858	2.858	2.81637	2.62522	2.56453	2.53389
0	'F'	64	158	78	Right index finger'	66	96	-19	28	53	-17	-3	-26	7	31	cgvs5csg0t889ug8sbt0.txt	0.45476	0.818007	0.408211	0.218206	0.108684	0.0599812	0.0451907	0.0349932	0.02504	0.0175787	0.0134776	0.0105624	0.0354331	0.0480211	0.050885	0.0735661	0.127594	0.0891162	0.100672	0.121029	0.114924	0.13108	0.154706	0.225624	4.43066	3.8146	3.21461	2.78969	2.6861	2.56241	2.25736	1.97069	1.76521
3	'F'	46	148	72	Right index finger'	80	96	-9	23	23	-53	15	-1	-29	18	chc61672had61agb7ol0.txt	0.505801	0.8138	0.332234	0.105111	0.0630426	0.0492054	0.0222587	0.014783	0.0107682	0.00542325	0.00294895	0.0019856	0.0140363	0.0157618	0.0504515	0.169151	0.0502849	0.106603	0.217716	0.126433	0.176192	0.357701	0.351845	0.416778	4.05805	3.28768	2.5502	2.92956	2.25136	1.95262	1.95104	1.46471	0.979804
9	'F'	64	155	65	Right index finger'	65	95	-6	18	0	-46	-28	79	6	-2	cgglcq72had620d3kse0.txt	0.531497	0.755417	0.263577	0.0943037	0.0353884	0.0495042	0.035802	0.019233	0.0183131	0.0141063	0.00818795	0.00657991	0.0204804	0.0184098	0.0740548	0.136911	0.125465	0.0500996	0.141451	0.0754854	0.0740637	0.157202	0.11462	0.210766	4.00899	3.3591	2.84914	3.19914	3.27528	2.62503	2.4939	2.50201	2.02383
25	'F'	81	156	60	Right index finger'	103	97	-13	32	31	-61	0	-8	-51	-5	cgvs72f2had61ag64n60.txt	Inf	0.64086	0.404256	0.0917247	0.223213	0.0995105	0.196554	0.227468	0.16213	0.0616689	0.0477366	0.120677	NaN	0.350082	0.493907	1.67468	1.70754	2.07334	2.15374	2.51806	2.65336	2.68615	1.86572	2.16839	3.47676	3.4719	3.00389	2.37714	2.88379	2.33497	3.78183	2.8233	4.2359
3	'F'	76	157	64	Right index finger'	73	92	-3	20	-5	-33	-5	27	-29	-24	chgvnccg0t88crmjb280.txt	Inf	0.773377	0.248806	0.111453	0.0564395	0.0509778	0.0279165	0.0109304	0.0126305	0.00843306	0.00545499	0.00137199	NaN	0.0993285	0.158701	0.249911	0.23107	0.268604	0.329547	0.383388	0.351736	0.341818	0.596887	0.739571	3.88665	3.35013	2.74129	2.9854	2.5949	1.80746	2.03068	1.97858	1.73385
3	'F'	76	170	84	Right index finger'	75	95	-10	21	31	-20	-16	1	10	-3	cgn290cg0t8edo0cj0gg.txt	0.504465	0.794592	0.33983	0.19125	0.0786022	0.0670204	0.0486947	0.0268651	0.0188594	0.0138121	0.00893702	0.00600956	0.0301512	0.0416528	0.0380465	0.115789	0.191757	0.0638361	0.127959	0.222249	0.108634	0.184252	0.26581	0.268678	4.23437	3.73868	3.06002	2.8217	2.80422	2.24573	1.87563	1.79109	1.46047
0	'F'	64	163	65	Right index finger'	70	93	-12	23	36	-16	-53	49	3	-28	cc5l05f2hadcsjhi9s10.txt	0.497731	0.795162	0.359596	0.201816	0.051227	0.057936	0.0410112	0.0165907	0.00723904	0.00505432	0.00263465	0.00137209	0.00827268	0.0116018	0.0271959	0.0323598	0.0899535	0.054405	0.0262894	0.0574487	0.136727	0.19833	0.273083	0.457315	4.11365	3.60506	2.66211	2.41747	2.40026	1.48218	0.925407	0.836501	0.426739
0	'F'	80	158	60	Right index finger'	75	97	-7	22	-1	-41	-24	29	-9	-18	cgptqb72had7n67qvfn0.txt	0.522731	0.797698	0.265434	0.106836	0.0394598	0.0392586	0.0256007	0.0111337	0.00754072	0.00678871	0.00395901	0.00223434	0.0117715	0.0213546	0.0214266	0.0556369	0.0611519	0.0607599	0.0926148	0.188198	0.112142	0.100829	0.17688	0.247094	3.96371	3.22048	2.7347	2.85391	2.85064	2.13426	1.75802	2.15433	1.86727
0	'F'	57	170	80	Right index finger'	75	96	-8	21	16	-38	-30	17	-16	-6	cfi8fjf2haddiqs0sq6g.txt	0.520408	0.780796	0.30731	0.125417	0.045603	0.042683	0.0242395	0.0121584	0.010974	0.00706647	0.0042307	0.003488	0.0129068	0.0156278	0.027313	0.0640899	0.0500338	0.0265967	0.0653496	0.0824315	0.0818662	0.146154	0.136598	0.18423	4.04097	3.37303	2.68484	2.79196	2.61772	2.0884	2.22973	2.09484	1.7881
10	'F'	80	150	62	Right index finger'	63	95	0	8	0	-17	0	-5	54	31	chgvpiv2had9fa0ip6fg.txt	0.562974	0.698244	0.268788	0.146342	0.0798782	0.0558417	0.0573467	0.042493	0.0215518	0.0151813	0.0123966	0.00859413	0.0215695	0.0266458	0.0660358	0.0479717	0.115999	0.0676131	0.0937385	0.133533	0.14645	0.0964885	0.149444	0.168237	4.08781	3.6614	3.36074	3.04872	3.21551	2.76469	2.14292	1.86664	1.93964
16	'F'	78	162	51	Right index finger'	59	95	-13	28	23	-39	-49	7	8	-6	cgchq8kg0t8d04b8gteg.txt	0.486416	0.83306	0.328523	0.129411	0.0346236	0.0294341	0.0208181	0.0105243	0.00760039	0.0053541	0.00397672	0.00328637	0.0117854	0.018299	0.0310383	0.0562534	0.12805	0.0716651	0.0887334	0.087596	0.120416	0.153164	0.14492	0.142292	4.0724	3.27192	2.50054	2.29109	2.6207	2.19881	2.10353	2.06868	1.97211
29.5	'F'	76	165	39	Right index finger'	90	94	-11	31	14	-61	0	-28	-16	20	cc6s8nf2hadcsjhidpmg.txt	0.503447	0.842933	0.303589	0.0790737	0.0441833	0.0240516	0.0129042	0.00905767	0.00357552	0.00193834	0.00213502	0.00176994	0.016954	0.0324257	0.0273322	0.055409	0.0948858	0.0878195	0.152652	0.204843	0.446344	0.498526	0.342523	0.533788	3.94612	3.02708	2.36077	2.54663	2.09434	2.13508	2.31733	2.0483	1.50536
8	'F'	83	147	57	Right index finger'	77	95	0	12	-4	-34	5	14	-17	19	cbork2avjtoqui5si180.txt	0.56932	0.708671	0.257246	0.111053	0.0674933	0.0574316	0.0314412	0.0216194	0.0169983	0.0106692	0.00803817	0.00625185	0.0196245	0.0306756	0.0587602	0.134515	0.127208	0.0605185	0.13274	0.127949	0.0992594	0.126762	0.118597	0.147948	3.9798	3.47936	3.03813	3.23149	2.85501	2.45926	2.45196	2.22064	1.97395
7	'F'	63	165	60	Right index finger'	52	97	-8	9	15	-20	1	-56	50	100	cgn75g4g0t8edo0cl0p0.txt	0.500381	0.741789	0.328583	0.176743	0.0930188	0.0313368	0.0256948	0.0340221	0.03778	0.0202564	0.0149167	0.00731704	0.0703741	0.12262	0.099331	0.0726737	0.0972321	0.235435	0.420803	0.477745	0.467906	0.436561	0.427434	0.747563	4.15209	3.58583	3.04936	2.38101	2.28292	2.73487	2.32697	2.53175	2.09637
5	'F'	76	164	72	Right index finger'	77	96	-4	11	24	-34	29	-10	1	19	cg06arf2haddiqs1u6u0.txt	0.505847	0.800342	0.297946	0.174982	0.0853311	0.0787357	0.0430939	0.0278977	0.0233746	0.0160182	0.00883512	0.00588835	0.102615	0.183044	0.290723	0.444588	0.438516	0.435878	0.519377	0.574628	0.635411	0.736112	0.807645	0.801789	3.76353	3.0826	3.12625	3.0707	2.35583	1.62773	2.46321	2.16252	1.97338
8	'F'	67	158	51	Right index finger'	71	94	-8	20	10	-38	-32	33	8	-31	chgvs772had9fa0ip870.txt	0.516383	0.776686	0.298453	0.122417	0.0449356	0.0441059	0.0356384	0.0123103	0.01073	0.00821534	0.00370171	0.00240209	0.0177454	0.0281427	0.0259056	0.0420978	0.0907422	0.159719	0.371045	0.318931	0.238745	0.300972	0.402808	0.5066	4.04724	3.36483	2.70459	2.84117	2.81141	2.32555	2.12865	2.18899	2.08197
[truncated: 25 more columns]
